# Supplementary material for: Mosquito bacterial communities show stage-specific patterns relevant for vector ecology and AMR surveillance
Source: Research Square preprint supplement (doi:10.21203/rs.3.rs-7544775/v1), 2025-10-09
Supplement: Supplementary file 1 [file 1a67039f5b29cca3fd515929.xlsx]

## Sheet: Sheet1
In-county location	Althofen	Althofen	Althofen	Althofen	Althofen	Althofen	Althofen	Althofen	Althofen	Althofen	Althofen	Althofen	Althofen	Althofen	Althofen	Althofen	Althofen	Althofen	Althofen	Althofen	Althofen	Althofen	Althofen	Althofen	Althofen	Althofen	Althofen	Althofen	Alava	Alava	Alava	Alava	Alava	Alava	Alava	Alava	Alava	Alava	Alava	Alava	Alava	Alava	Alava	Alava	Alava	Alava	Alava	Alava	Alava
Aedes species	Aedes japonicus	Aedes japonicus	Aedes japonicus	Aedes japonicus	Aedes japonicus	Aedes japonicus	Aedes japonicus	Aedes japonicus	Aedes japonicus	Aedes japonicus	Aedes japonicus	Aedes japonicus	Aedes japonicus	Aedes japonicus	Aedes japonicus	Aedes japonicus	Aedes japonicus	Aedes japonicus	Aedes japonicus	Aedes japonicus	Aedes japonicus	Aedes japonicus	Aedes japonicus	Aedes japonicus	Aedes japonicus	Aedes japonicus	Aedes japonicus	Aedes japonicus	Aedes japonicus	Aedes japonicus	Aedes japonicus	Aedes japonicus	Aedes japonicus	Aedes japonicus	Aedes japonicus	Aedes japonicus	Aedes japonicus	Aedes japonicus	Aedes japonicus	Aedes japonicus	Aedes japonicus	Aedes japonicus	Aedes japonicus	Aedes japonicus	Aedes japonicus	Aedes japonicus	Aedes japonicus	Aedes japonicus	Aedes japonicus
Developmental stage	Larvae	Larvae	Larvae	Larvae	Larvae	Larvae	Larvae	Larvae	Larvae	Larvae	Larvae	Larvae	Larvae	Larvae	Larvae	Larvae	Larvae	Larvae	Larvae	Larvae	Larvae	Larvae	Larvae	Larvae	Larvae	Larvae	Larvae	Larvae	Adult	Adult	Adult	Adult	Adult	Adult	Adult	Adult	Adult	Adult	Adult	Adult	Adult	Adult	Adult	Adult	Adult	Adult	Adult	Adult	Adult
Bacterial genera - Country	AUT_Austria_1	AUT_Austria_2	AUT_Austria_3	AUT_Austria_4	AUT_Austria_5	AUT_Austria_6	AUT_Austria_7	AUT_Austria_8	AUT_Austria_9	AUT_Austria_10	AUT_Austria_11	AUT_Austria_12	AUT_Austria_13	AUT_Austria_14	AUT_Austria_15	AUT_Austria_16	AUT_Austria_17	AUT_Austria_18	AUT_Austria_19	AUT_Austria_20	AUT_Austria_21	AUT_Austria_22	AUT_Austria_23	AUT_Austria_24	AUT_Austria_25	AUT_Austria_26	AUT_Austria_27	AUT_Austria_28	ESP_Spain_29	ESP_Spain_30	ESP_Spain_31	ESP_Spain_32	ESP_Spain_33	ESP_Spain_34	ESP_Spain_35	ESP_Spain_36	ESP_Spain_37	ESP_Spain_38	ESP_Spain_39	ESP_Spain_40	ESP_Spain_41	ESP_Spain_42	ESP_Spain_43	ESP_Spain_44	ESP_Spain_45	ESP_Spain_46	ESP_Spain_47	ESP_Spain_48	ESP_Spain_49
Unassigned	10.872	16.2266	12.5943	9.76092	14.6394	15.8286	16.6971	13.7125	9.44062	11.1693	15.9888	21.3665	12.6926	13.2146	20.5158	14.0366	11.0241	12.1842	19.3707	11.3055	1.88514	1.54834	1.05085	7.88425	6.25805	1.78675	2.32577	6.55238	38.0424	6.70354	0.562527	11.2219	4.1707	5.00849	7.48802	8.56619	1.42005	2.46386	0.275426	2.22248	5.70148	1.79165	0.207808	5.62486	14.483	19.7757	26.1308	19.6818	22.9664
Wolbachia	0	0	0	0	0	0	0	0	0	0	0	0	0	0	0	0	0	0	0	0	0	0	0	0	0	0	0	0	0	0	0	0	0	0	0	0	0	0	0	0	0	0	0	0	0	0	0	0	0
Acinetobacter	0	0	0	1.26289	0.241558	0	0.121845	0	0	0	0.525758	0.153684	0	0	0	0	0	0	0.432726	0	0	0.142704	0	0	0	0	0	0.214292	0.585742	0	0	4.31722	3.64796	0.882852	0	2.86005	12.7327	6.046	2.51964	2.34008	11.7367	0	0	3.3336	2.26782	2.51386	0	0	4.09408
Flavobacterium	10.4265	5.12295	5.35802	7.4424	7.95632	9.38146	3.73803	7.2955	8.78954	3.711	0.713238	6.4196	8.38609	7.32923	0.790267	5.71978	7.15555	8.25348	5.48326	4.89076	5.36112	2.16197	3.27454	3.80455	0	4.2047	0	1.0591	3.29094	3.61178	16.5056	1.58322	7.99911	10.3905	0	9.331	0	0	0	4.8683	0	0	0	2.30746	3.96982	1.84994	2.6158	3.16735	4.98913
uncultured	2.92891	0.0667175	1.178	0.327774	0.714609	3.80906	0.291558	0.771697	4.72031	1.87623	3.41947	0.67621	1.17071	0	0	0.891311	0.177677	0.163328	0.840726	0	0	0.221192	0	0	0	0	0	0	0	0.397107	0	0.92735	4.65808	0	0.182167	4.25023	0	0.790981	0	0	0	0	0	0	4.08998	0.399639	0.430518	0	3.0155
Aeromonas	0	0	0	0	0	0	0	0	0	0	0	0	0	0	0	0	0	0	0	0	0	0	0	0	0	0	0	0	0.131021	4.9402	11.1159	0	0	0	0	0.942062	10.185	19.6381	14.2609	17.9915	2.17381	6.55975	0	1.90781	1.3689	15.6697	0	0	0
Limnobacter	0	0	0	0	0	0	0	0	0	0	0	0	0	0	0	0	0	0	0	0	0	0	0	0	0	0	0	0	0	16.201	7.28881	0	0	0	0	0	0	0	0	0.105833	0	0	0	0	26.6663	0	0	0	0
Pseudomonas	1.08531	0.438429	0.754574	0.510942	0.603895	0.371952	0.483029	0.391784	0.67278	1.17653	1.50799	0.162466	0.710787	1.08773	0	0.737416	0.589565	1.20862	0	5.96985	0	1.1559	0	2.01613	2.46746	3.38901	1.82446	4.40946	5.92678	8.55671	3.66364	2.60427	5.58077	0	3.16395	0.47601	5.62649	10.2828	9.81332	11.5828	4.78143	5.0065	11.9489	4.87416	0	3.96416	5.84741	4.55276	0
Hydrogenophaga	0	0	0	0	0	0	0	0	0	0	0	0	0	0	0	0	0	0	0	0	0	0	0	0	0	0	0	0	0	1.22441	2.96649	0.0408418	1.05849	0	0	0	0	0	0	0	0	0	0	0.634586	0.49889	0	0	0	0
Nevskia	3.54028	3.46931	2.69258	1.10865	2.90876	9.09905	4.44735	3.42515	3.02751	1.40976	2.65324	0	5.5967	0	0	0	0	2.00893	3.41854	0	0	0	0.300244	0.336812	0.436275	0	0	0	0	11.0717	0	2.41207	1.91234	10.2971	11.3615	2.50154	0	0	0	0	0	0	2.18198	0	4.09759	1.93374	2.34877	0	0
Chloroplast	0	0	0	0	0	0	0	0	0	0	0.126345	1.01431	0	0	0	0	0	0	0.111273	0	0	0	0	0	0	0	0	0	0	0	1.8222	1.39823	1.92351	0	0	1.9857	0	0	10.1194	1.38758	0.400439	0	0	1.42444	2.65263	0	0	0	1.24799
Novosphingobium	0.781991	1.54403	1.52	0	0	0	2.0235	0	0	0.792993	1.34496	1.08018	0	0	0.613497	0	0	0	1.47436	4.90072	0	2.31181	2.82417	2.96015	1.60921	0	0	6.57298	0	0	0.471176	0	0	0	0	1.23086	0	0	0	0	0	0	1.94449	0.843865	0	0.328735	0	0	1.53881
Rheinheimera	0	0	0	0	0	0	0	0	0	0	0	0	0	0	0	0	0	0	0	0	0	0	0	0	0	0	0	0	0	0.676027	4.86081	4.11782	4.2265	1.12054	0	2.8939	0	0	0	0	0	0	0	3.00956	2.51726	0.425422	0.561308	0	0.324703
Chryseobacterium	8.22749	7.44853	6.22659	4.46351	5.65648	6.65381	3.96867	6.5891	7.19983	6.87779	0	4.97497	5.94911	6.54581	10.3359	4.34113	14.6826	6.77809	2.86836	0.12617	0	0	0	0	0	0	0	0	0	0.832033	0.408673	2.62589	1.05477	0	0	0.388377	9.18258	0.927357	3.34591	1.48166	6.59294	7.79512	1.0613	1.0761	0	0	0.239782	0.582271	0
Stenotrophomonas	0	0	0	0	0	0	0	0	0	0	0	0	0	0	0	0	0	0	0	0	0	0	0	0	0	0	0	0	0	6.21188	0	0	0	0	0	0	10.6086	16.0105	32.1432	32.3848	15.2596	35.0816	19.5191	24.7543	2.79561	1.50187	4.65395	5.36091	0
Acidovorax	0.483412	0.486085	0.477716	0.520582	2.58668	1.21229	1.58834	3.48451	1.82844	1.91769	7.56032	0.469834	2.04874	1.78699	3.18187	1.76339	6.02487	3.20666	2.31818	6.18567	1.56697	7.74171	9.11053	6.84061	9.66242	9.39988	13.3383	6.93151	17.9961	1.77753	0	5.41515	2.8555	19.652	19.0125	1.44994	5.28043	2.44568	1.72396	2.31656	5.58707	3.92284	0.356242	0.561676	0	0.373856	0.708447	0.582271	0
Sphingomonas	0	0	0	0	0	0	0	0	0	0	0	0	0	0	0	0	0	0.560758	0	0	0	0	0	0	0	0	0	0.62227	5.59538	0	0	2.36162	1.6054	4.55857	7.09492	1.98769	2.47613	6.22784	0	3.58655	1.57792	6.94986	6.24165	1.1031	0.358957	0	6.58311	5.72734	1.39763
Comamonas	0	0	0	0	0	0	0	0	0	0	0	0	0	0	0	0	0	0	0	2.73591	1.24881	1.47699	3.03997	1.20019	3.2971	1.22354	3.13938	2.52205	2.22736	6.25916	6.77917	0	0	0	0	0	0	0	0.0918086	0	0	0.5924	0	0	0	5.69163	0	0	0
AllorhizobiumNeorhizobiumPararhizobiumRhizobium	3.20853	4.76077	2.86087	3.18134	5.38473	0	2.78503	3.50825	1.73621	0.430186	1.82996	4.06165	1.78593	1.34671	1.59093	0	2.22097	0.925523	1.49291	2.95836	3.64302	0	0	3.48672	3.96224	3.61235	0	3.20201	0	0	0	0	0	0	0	0	0	0	0	0	0	0	0	0	0	5.8979	0.316076	6.70113	0
Xanthobacter	0	0	0	0	0	0	0	0	0	0	0	0	0	0	0	0	0	0	0	0	0	0	0	0	0	0	0	0	0	0	0	0	0	0	0	0	0	0	0	0	0	0	0	0	0	0	0	0	0
Aquabacterium	2.17062	6.15707	4.27773	8.46428	0	0	3.7859	8.5777	5.12723	6.60309	20.1907	0	2.57436	7.61411	7.35156	5.68772	5.71798	3.75653	1.99363	0.554486	0.795418	0	1.87652	0.702087	0	1.06817	4.33103	1.18272	11.5915	0	2.92803	2.08053	6.49974	2.60611	8.79195	5.08475	0	8.82808	0	0	0	0	0.898026	0	0	0.315844	2.87193	0	0
Corynebacterium	0	0	0	0	0	0	0	0	0	0	0	0	0	0	0	0	0	0	0.327636	0.292184	0	0	0	0	0	0	0	0	0	0	0	2.55382	3.95863	0	0	1.53558	0	0	0	0.270461	0	0	0	1.1382	0	0.283615	0	0	0
Flectobacillus	0	0	0	0	0	0	0	0	0	0	0	0	0	0	0	0	0	0	0	0	0	0	0	0	0	0	0	0	0	0	0	0	0	0	0	0	2.4642	5.29139	7.72213	0.388053	7.02674	6.4586	1.75894	0.356448	0	0	0	0	0
Rhodobacter	3.91943	4.9085	3.29515	2.96443	4.30275	2.98939	2.09748	0	4.37307	3.03721	2.98337	3.54791	4.58727	5.15377	5.18873	4.22571	7.08286	6.15745	4.94854	0	0.222717	0.16411	0	1.91651	0.307538	0.427267	0	0	0	2.96412	3.10111	0	0	0	0	0	0	0.527321	0	0	0	0	0	1.17466	0.12168	0	0	0.416625	0
Saccharimonadales	0	0	0	0	0	0	0	0	0	0	0.22416	0	0	0	0	0	0	0	0	0	0	0	0	0	0	0	0	0	0	0	0	1.81626	0.926408	0	0	1.62521	0	0.490954	0	0	0	0	0	0	0.625133	0.135362	0.27248	0	0
Variovorax	0	0	0	0	0	0	0	0	0	0	0	0	0	0	0	0	0	0	0.213272	0	0	0	0	0	0.48634	0	0	0	0	0	0	0	0	0	0	0	0	0	0	0	0	0	0	1.22462	0	0.889519	0	0	3.76655
Rhizobacter	3.8673	2.37324	3.25172	2.59809	3.20568	0	2.77633	0	3.55922	3.36892	3.11379	0	2.29363	2.93946	3.47302	3.15486	4.25618	3.82186	0	0.152733	2.5692	2.93257	0	0	1.93821	0.0194212	0	0	0	1.94299	1.35583	0	0.833395	0	0	0	0	0	0	0	0	0	0	0	0.731603	4.30579	7.3842	6.8467	0
Pseudorhodobacter	0	0	0	0	0.88068	0	0	0	0	0	0	0	0	0	0	0	0	0	0	0	0	0	0	0	0	0	0	0.329679	0	0	3.2165	0	0	0	0	0	4.32578	0	0.448842	0	1.86395	0.541829	0	0	1.2746	0	0	0	0
Roseococcus	0	0	0	0	0	0	0	0.344295	0	0	0	4.1846	0	0	4.68961	0	0	0	2.78799	2.80563	0	0.770603	0	0.422201	0.936919	0	0	3.74598	0	0	0	0	0	0	0	0	0	0	0	0	0	0	0	0	0	0	0	0	0
Massilia	0	0	0	0	0	0	0	0	0	0	0	0	0	0	0	0.00641231	0	0	0	0	0	0	0	0	0	0	0	0	0.88632	0	0	0.713531	0	0	0	0.705053	0	0.00909174	0	0.246943	0	0	0	0	0.863931	0	0	0	0
Delftia	0.312796	0.686237	0.510287	5.28295	0.895778	0.385728	4.14273	0.575804	0	0.829273	3.99821	1.46658	2.07263	0.0258983	1.2166	0.262905	0.920691	0	0	0.341988	0	0	0	0.303605	0.679445	0	1.10947	0	0	1.02586	1.78855	0.850471	1.61284	2.92869	0	0	5.0716	5.41867	11.6291	8.86642	3.88521	10.5332	12.654	4.27468	0.442612	0	0	0	0
Hydrocarboniphaga	0	0	0	0	0	0	0	0	0	0	0	0	0	0	0	0	0	0	0	0	0	0	0	0	0	0	0	0	0	0	0	0	0	0	0	0	0	0	0	0	0	0	0	0	0	0.960423	2.53951	1.96265	0
Limnohabitans	0	0.638582	0.477716	0	0	0.247968	0.639687	0	0.179046	0	0	0.728901	0	0	0	0.365502	0	0	1.17454	3.71871	0.851098	1.66964	1.7264	1.97818	0.858246	0.0971062	0.66568	4.07978	0	0	1.56258	0.281088	0.163703	0	0	0	0	0	0	0	0.123945	0	0	0.746652	0	0	0	0	0
Pantoea	0	0	0	0	0	0	0	0	0	0	0	0	0	0	0	0	0	0	0	0	0	0	0	0	0	0	0	0	0	0	0	1.10033	1.55704	0	0.306807	0	0	0	0	0	0	0	0	0	0	0	0	0	0
PeM15	0	0	0	0	0	0	0	0	0	0	0	0	0	0	0	0	0	0	0	0	0	0	0	0	0	0	0	0	0	0	0	0	0	0	0	0	0	0	0	0	0	0	0	0	0	0	0	0	0
Bacillus	0	0	0	0	0	0	0	0	0	0	0	0	0.322542	0	0	0	0	0	0	1.26834	0	2.48305	0	0.227704	0	0	0	0	0	0	0	0	2.09837	0	0	2.22072	0	0	0	0	0	0	0	0.344297	0	0	0	0	0
Staphylococcus	0	0	0	0	0	0	0	0	0	0	0	0	0	0	0	0	0	0	0	0	0	0	0	0	0	0	0	0	0	0	0	3.15924	1.53471	3.82852	0	0	0	0	0	0	1.60652	0	0	1.03019	0.904998	0	0.365123	0	0.511054
Brevundimonas	0	0	0	0	0	0	0	0	0	0	0	0	0	0	0	0	0	0	0	0	0	0	0	0	0	0	0	0	0	1.30951	1.5193	0	0	0	0	0	3.94988	1.00009	1.64235	0	4.61934	3.26542	0.141012	2.50054	0.856326	0	0	0	0
Asaia	0	0	0	0	0	0	0	0	0	0	0	0	0	0	0	0	0	0	0	0	0	0	0	0	0	0	0	0	0	0	0	0	0	0	0	0	0	0	0	0	0	0	0	0	0	0	0	0	0
Pedobacter	0	6.10465	4.23973	1.58585	1.15747	2.25926	4.96519	0.486762	0	2.02135	2.48207	3.44252	1.36184	1.20427	3.48341	3.34723	2.72977	4.12674	2.69836	5.73743	2.23513	0	2.02665	3.7334	0	0	0.969757	3.48636	0	3.41795	3.7598	0	0	1.3073	0.786194	0.601486	1.15155	0	0	0	0.548219	0	0.207808	1.17466	0	0	0	0	27.803
Bosea	0.587678	0	0.933717	1.93772	0.946102	0	0	0	1.66025	0.922567	0	0	0.764544	0	1.99646	0	0.702633	0.47365	0	0.743741	3.8021	1.2772	3.17133	0	3.28994	0.650612	1.87377	0	0	0.416017	0.182701	0	0	0	0	0	1.14558	0	0.581455	0.235183	0.834247	1.06921	0	1.04774	2.22219	0	0	0	3.4955
Methylophilus	0	0	0	0	0	0	0	0	0	0	0	0	0	0	0	0.128246	0	0	0	0	0	0	0	0	0	0	0	0	0	0	0	1.61686	1.67237	9.31239	0	0	0	2.37294	1.49954	1.12888	2.7983	0	0	1.15441	3.16521	0.560784	0.446866	0.647525	0
Fluviicola	0	0	0	0	0	1.67378	1.30983	0	0	0.554577	0	0	0	0.194238	0	0	0	0	0	0	0	0	0	0	0	0	0	0	0	5.00165	1.85586	0	0	0	0	2.06736	0	0	0	0	0.109644	0	0	0	0.10647	0	0	0	0
MethylobacteriumMethylorubrum	0	0	0	0	0	0	0	0	0	0	0	0	0	0	0	0	0	0	0	0.793545	0	0.841955	0	0	0	0	0	0	5.00193	0	0	3.93042	3.24429	4.44822	10.4986	0.079667	0	0	0	0	0	0	0	0	1.29438	2.94573	3.297	6.85172	0.99952
Paracoccus	0	0	0	0	0	0	0	0	0	0	0	0	1.08111	0	0	0	0	0	0	0	0	0	0	0	0	0	0	0	0.508671	0	0	0	0	0	0.824545	1.9379	0	0	0	0	0	0	0.489832	1.18546	0	0.818615	0	0	0
Emticicia	0	0	0	0	0	0	0	0	0	0	0	0	0	0	0	0	0	0	0	0	0	0	0	0	0	0	0	0	0.246628	0	0	0	0	0	0	0	0.405728	0	0	0	0	0	0	0	0	0	0	0	0
Sphingobium	0	0	0	0	0	0	0	0	0	0	0	0	0	0	0	0	0	0	0	0	0	0	0	0	0	0	0	0	0	0	0	0	0	0	0	0	0	0	0	0	0	0	0	0	0	0	0	0	0
Enterobacter	0	0	0	0	0	0	0	0	0	0	0	0	0	0	0	0	0	0	0	0	0	0	0	0	0	0	0	0	0	0	0	0	0	0	0	0	0	0	0	0	0	0	0	0	0	0	0	0	0
Caulobacter	0	0	0	0	0	0	0	0.213701	0	0.440551	0	0.351278	0	0	0	0	0	0	0.404908	2.52673	4.74865	3.45344	4.38169	2.58539	5.42126	6.23422	0	2.82288	0	0	0	0.554968	0	0	0	0.987871	0	0	0	0	0	0	0	0	1.02972	0	0.310627	0	0
Bdellovibrio	0	0	0	0	0	0	0	0	0	0	0	0	0	0	0	0	0	0	0	0	0	0	0	0	0	0	0	0	0	1.64516	0	0	1.12732	0	0	1.5316	0	0	0	0	0	0	0	0	2.38189	0	0	0.873406	0
Serratia	0	0	0	0	0.201298	0	0	0	0	0	0	0	0	0	0	0	0	0	0	0	0	0	0	0	0	0	0	0	0	0	0	0	0	0	0	0	0	0	0	0	0	0	0	0	0	0	0	0	0
Phreatobacter	1.39336	2.10637	0	1.51354	1.01656	0	0.905135	0.985397	0.499159	0.855188	0	0.601563	0.525624	0.569764	4.29448	0.788714	0	0	2.64272	0.498041	0.755647	0.906172	0.516044	0	0	0	0	0.490398	0	0	0	0	0	0	0	0	0	0	0	0	0	0	0	0	0	0	0	0	0
Sphingorhabdus	0	0	0	0	0	0	0	0	0	0	0	0	0	0	0	0	0	0	0	0	0	0	0	0	0	0	0	0	0	0	0	0	0.386934	0	0	0	0	0	0	0	0	0	0	0	0.311806	0	0	0	0
Azospirillum	0	0	0	0	0	0	0	0	0	0	0	0	0	0	0	0	0	0	0	0	0	0	0	0	0	0	0	0	0	0	0	0	0	0	0	0	0	0	0	0	0	0	0	0	0	0	0	0	0
Sphingopyxis	0	0	0	0	0	0	0	0	0	0	0	0	0	0	0	0	0	0	0	0	0	0	0	0	0	0	0	0	0	0	0	0.884105	0	0	0	0	0	0	0	0	0	0	0	0	0	0	0	0	0
Elizabethkingia	0	0	0	0	0	0	0	0	0	0	0	0	0	0	0	0	0	0	0	0	0	0	0	0	0	0	0	0	0	0	0	0	0	0	0	0	2.00477	0	0	0.376294	2.58855	5.51943	7.39201	1.4663	0	0	0	0	0
Cloacibacterium	0	0	0	0	0	0	0	0	0	0	0	0	0	0	0	0	0	0	0	0	0	0	0	0	0	0	0	0	0	0	0	0	0	0	0	0.567627	0	0	0	0	0	0	0	0	1.03885	0	0	0	0
Erwinia	0	0	0	0	0	0	0	0	0	0	0	0	0	0	0	0	0	0	0	0	0	0	0	0	0	0	0	0	0	0	0	0	0	0	0	0	0	0	0	0	0	0	0	0	0	0	0	0	0
Vogesella	0	0	0	0	0	0	0	0	0	0	0	0	0	0	0	0	0	0	0	0	0	0	0	0	0	0	0	0	0	0	0	0	0	0	0	0	0	0	0	0	0	0	0	0	0	0	0	0	0
Sphingobacterium	0	0	0	0	0	0	0	0	0	0	0	0	0	0	0	0	0	0	0	0	0	0	0	0	0	0	0	0	0	1.04004	0.110582	0	0	0	0	0	0.674224	0	0	0	0.572055	0	0	0	0	0	0	0	0
IMCC26207	0	0	0	0	0	0	0	0	0	0	0	0	0	0	0	0	0	0	0	0	0	0	0	0	0	0	0	0	0	0	0	0	0	0	0	0	0	0	0	0	0	0	0	0	0	0	0	0	0
Spirosoma	0.374408	0	0	0	0	0	0	0	0	0	0	0	0	0	0	0	0	0	0	0.381831	0	0	0	0	0	0	0	0	0	0	0	0	0	0	0	0	0	0	0	0	0	0	0	0	0	0.315844	0.741144	0.376468	0
Methylotenera	0	0	0	0	0	0	0	0	0	0	0.489077	0	0	0	0	0	0	0	0	0	0	0	0	0	0	0	0	0	0	1.76334	0	0	0	0	0	0	0	0	0	0	0	0	0	0	1.17878	0	0	0	0
Nocardioides	0	0	0	0	0	0	0	0	0	0	0	0	0	0	0	0	0	0	0	0	0	0	0	0	0	0	0	0	0	0	0	0	0.812933	0	0	0	0	0	0	0	0	0	0	0	0	0	0	0	0
Yokenella	0	0	0	0	0	0	0	0	0	0	0	0	0	0	0	0	0	0	0	0	0	0	0	0	0	0	0	0	0	0	0	0	0	0	0	0	0	0	0	0	0	0	0	0	0	0	0	0	0
Devosia	2.17536	2.64011	2.49172	4.81539	0	1.52225	2.88077	3.50232	3.98242	3.02166	0	1.97155	3.32696	0	2.93231	3.21898	1.6314	0	2.96418	2.92184	2.95896	1.99072	3.5091	3.0408	4.16249	2.30142	3.71466	4.3394	0	0	0	0	0	0	0	0	0	0	0	0	0	0	0	0	0	0	0	0	0
C39	0	0	0	0	0	0	0	0	0	0	0	0	0	0	0	0	0	0	0	0	0	0	0	0	0	0	0	0	0	0	0	0	0	0	0	0	0	0.972816	0	0	0	0	0	1.34208	0	0	0	0	0
Edaphobaculum	0	0	0	0	0	0	0	0	0	0	0	0	0	0	0	0	0	0	0	0	0	0	0	0	0	0	0	0	0	0	0	0	0	0	0	0	0	0	0	0	0	0	0	0	0	0	0	0	0
Enhydrobacter	0	0	0	0	0	0	0	0	0	0	1.36534	0	0	1.37261	0	0	0	0	0	0	0	0	0	0	0	0	0	0	0	0	0	0	0	0	0	0	0	0	0	0.752587	0	0	0	0	0	0	0	0	0
Mitochondria	0	0	0	0	0	0	0	0	0	0	0	0	0	0	0	0	0	0	0	0	0	0	0	0	0	0	0	0	0.16185	0	2.50012	1.91236	0	0	0	0.292776	0	0	0	0	2.53134	0	0	1.37044	0	0	0.316076	5.2555	0
Ancylobacter	0	0	0	0	0	0	0	0	0	0	0	0	0	0	0	0	0	0	0	0	0	0	0	0	0	0	0	0	0	0	0	0	0	0	0	0	0	0	0	0	0	0	0	0	0.100386	0	0	0	0
Ideonella	0	0	0	0	0	0	0	0	0	0	0	0	0	0	0	0	0	0	0	0	0	0	0	0	0	0	0	0	0	2.90739	1.05774	0	0	0	0	0	0	0	0	0	0	0	0	1.17061	0	0	0	0	0
Micrococcus	0	0	0	0	0	0	0	0	0	0	0	0	0	0	0	0	0	0	0	0	0	0	0	0	0	0	0	0	0	0	0	0	1.30218	0	0	0	0	0	0	0	0	0	0	1.27457	0	0	0	0	0
Roseomonas	0	0.905452	0	0	0	0	0.430809	0	0.320113	0	0	0	0.370326	0	0	0.262905	0	0	0.982907	0	0.477251	0	0	1.10057	0	0.252476	0	2.95063	0	0	0.0769268	0	0	0	0	0	0	0	0	0	0	0	0	0	0	0	0	0	0
Lacihabitans	0	0	0	0	0	0	0	0	0	0	0	0	0	0	0	0	0	0	0	0	0	0	0	0	0	0	0	0	0	1.1535	1.42315	0	0	0	0	0	0	0	0	0	0	0	0	0	0	0	0.26158	0	0
Legionella	0	0.671941	1.46029	0.337414	4.89658	1.17096	0	1.03882	0.287559	0	0	4.01774	3.6495	3.03658	0	0.275729	0	1.51895	3.68745	0	0.0715877	0	0	0	0	0	0	0.185445	0	0	0	0	0	0	0	3.82202	0	0	0	0	0	0	0	0.487416	0	0	0	0	0
Undibacterium	0.492891	0	0.608002	3.1958	2.88863	0.971208	0.339426	2.28541	0.727036	0.554577	4.16123	1.08896	1.23641	0.615086	0	0	1.75254	2.24303	0.936544	2.98825	5.18613	6.90689	6.2113	5.65465	5.24961	7.45776	7.59369	4.41358	0	0	2.20684	0.739958	0.760845	0	0	0	2.38067	2.87299	0	3.09266	4.58121	0.570727	8.34941	2.77058	0.477596	1.34072	4.41962	3.95543	2.76421
Paucibacter	0	0	0	0.0289212	0	0	0	0	0	0	0	0	0	0	0	0	0	0	0	0	0	0	0	0	0	0	0	0	0	0	0	0.718336	0	0	0	0	0.274463	0	0	0	0	0	0	0	0	0	0	0	0
Sediminibacterium	1.23697	3.42165	1.46029	0.544683	0.659252	0.75768	2.33681	1.60275	0.623949	1.50306	0.130421	5.12866	0.436029	2.08482	1.43496	1.39788	0	0.103441	4.05836	1.65018	0.898823	0.335355	0.53481	1.23814	0	0.670033	0	2.63331	0	0	0	0.365174	0	0	0	0	0	0	0	0	0	0	0	0	0	0	0	0	0
Blastomonas	0	0	0	0	0	0	0	0	0	0	0	0	0	0	0	0	0	0	0	0	0	0	0	0	0	0	0	0	0	0	0	0	0	0	0	0	0	0	0	0	0	0	0	0	0	0	0	0	2.32939
Lawsonella	0	0	0	0	0	0	0	0	0	0	0	0	0	0	0	0	0	0	0	0	0	0	0	0	0	0	0	0	0	0	0	2.36162	2.11883	0	0	0	0	0	0	0	0	0	0	0	0	0	0	0	0
117490112	0	0	0	0	0	0	0	0	0	0	0	0	0	0	0	0	0	0	0	0	0	0	0	0	0	0	0	0	0	0	0	0	0	0	0	0	0	0	0	0	0	0	0	0	0	0	0	0	0
Polynucleobacter	2.99052	5.69005	2.71972	0	2.18912	0	2.698	2.75436	2.17568	2.25459	5.8567	4.03091	3.56588	2.35028	1.42456	3.68067	1.67178	2.21037	2.78799	3.09449	2.90328	1.74813	3.70614	2.70398	2.01688	2.3791	1.91486	4.26111	0.508671	0	0	2.3472	1.19615	0	0	1.60927	0	0	0	0.399812	0	0	0	0.329445	0	0	0	0	0
Streptococcus	0	0	0	0	0	0	0	0	0	0	0	0	0	0	0.447125	0	0	0	0	0	0	0	0	0	0	0	0	0	0	0	0	0	0	0	0	0	0	0	0	0	0	0	0	0	0.652511	0.560784	0	0	0
Gluconacetobacter	0	0	0	0	0	0	0	0	0	0	0	0	0	0	0	0	0	0	0	0	0	0	0	0	0	0	0	0	0	0	0	0	0	0	0	0	0	0	0	0	0	0	0	0	0	0	0	0	0
Mycobacterium	0	0	0	0	0	0	0	0	0	0	0	0	0	0	0	0	0	0	0	0	0	0	0	0	0	0	0	0	0	0	0	0.485297	0	0	0	0	0	0	0	0	0	0	0	1.64317	0	0	0	0	0
Pectobacterium	0	0	0	0	0	0	0	0	0	0	0	0	0	0	0	0	0	0	0	0	0	0	0	0	0	0	0	0	0	0	0	0	0	0	0	0	0	0	0	0	0	0	0	0	0	0	0	0	0
Gracilibacteria	0	0	0	0	0	0	0	0	0	0	0	0	0	0	0	0	0	0	0	0	0	0	0	0	0	0	0	0	0	0	0	0.749568	0	0	0	0.79667	0	0	0	0.270461	0	0	0	0.29434	0.28747	0	0	0	0.948697
Arcicella	13.7109	7.84884	13.0992	8.00636	7.43294	14.0033	8.03742	9.40876	9.9669	10.6458	3.65585	6.38886	13.2302	10.1522	7.7571	14.9984	8.6335	9.34778	2.59018	3.03805	20.5138	24.7592	26.3183	17.3008	23.0511	24.7621	24.5398	6.5565	0	0	2.35107	3.9064	2.30114	6.39219	11.0067	3.4934	0	0	0	0	2.97945	2.25401	0	1.10445	2.1507	3.38404	5.53134	5.48138	0
Leucobacter	0	0	0	0	0	0	0	0	0	0	0	0	0	0	0	0	0	0	0	0	0	0	0	0	0	0	0	0	0	0	0	0	0	0.365025	0	0	0	0	0	0	0	0	0	0	0	0	0	0	0
Cutibacterium	0	0	0	0	0	0	0	0	0	0	0	0	0	0	0	0	0	0	0	0	0	0	0	0	0	0	0	0	0.423892	0	0	1.44628	0.978495	0.398981	0.29722	0	0	0	0	0	0	0	0	0	0.0577982	0	0	0	0.381173
Pseudarcobacter	0	0	0	0	0	0	0	0	0	0	0	0	0	0	0	0	0	0	0	0	0	0	0	0	0	0	0	0	0	0	0	0	0	0	0	0	0	0	0	0	0	0	0	0	0	0	0	0	0
Perlucidibaca	0	0	0	0	0	0	0	0	0	0	0	0	0	0	0	0	0	0	0	0	0	0	0	0	0	0	0	0	0	3.81033	3.97134	0	0	0	0	2.0813	0	0	0	0	0	0	0	0	0.579503	0.754158	0	0.883445	0
Shinella	0	0	0	0	0	0	0	0	0	0	0	0	0	0	0	0	0	0	0	0	0	0	0	0	0	0	0	0	0	0	0	0	0	0	0	0	0	0	0	0	0	0	0	0	0	0	0	0	0
Zoogloea	0	0	0	0	0	0	0	0	0	0	0	0	0	0	0	0	0	0	0	0	0	0	0	0.175522	0	0	0	0	0.339114	0	0	2.58745	0	2.8438	7.40173	0	0	0	0	0	0	0	0	0	0	0.360964	0	0	0
Pajaroellobacter	0.113744	0	0.684002	0.216909	0	0	0.221932	0.967589	0.282133	0.678968	0	0	0.376299	0.647459	0	0.320616	0.371507	0.234103	0	0	3.19758	3.29647	1.58566	2.14896	2.93234	1.07788	3.36949	0	3.39884	0	0	0	0.0892924	0	0.143816	0	0	0	0	0	0	0	0	0	0	0	0	0	0
Hymenobacter	0	0	0	0	0	0	0	0	0	0	0	0	0	0	0	0	0	0	0	0	0	0	0	0	0	0	0	0	0	0	0	0	0	0	0	0	0	0	0	0	0	0	0	0	0	0	0	0	0
Clostridiumsensustricto1	0.241706	0.366946	0	0	0	0	0.37859	0	0	0	0	0.36006	0	0	0	0.352677	0.549184	0.272213	0.543999	0	0	0	0	0	0	0	0	0	0	0	0	0	0	0	0.469799	0	0	0	0	0	0	0	0	0	0	0	0	0	0
Bordetella	0	0	0	0	0	0	0	0	0	0	0	0	0	0	0	0	0	0	0	0	0	0	0	0	0	0	0	0	0	0	0	0	0	0	0	0	0	0	0	0	0	0	0	0	0	0	0	0	0
Pseudoxanthomonas	0	0	0	0	0	0	0	0	0	0	0	0	0	0	0	0	0	0	0	0	0	0	0	0	0	0	0	0	0	0	0	0	0	0	0	1.70089	0	0	0	0	0	0	0	0	0	0	0	0	0
Rhodoferax	0	0	0	0	0	0	0.395997	0	0	0	0	0	0	0	0	0	0	0	0	0	0	0	0	0	0	0	0	0	0.200385	0	6.91379	5.38632	1.54587	4.19355	2.81879	2.97556	5.18496	0.83644	0	0	5.22	0	6.22681	0.51442	0	13.5168	14.267	12.6443	0
Alkanibacter	0	0	0	0	0	0	0	0	0	0	0	0	0	0	0	0	0	0	0	0	0	0	0	0	0	0	0	0	0	0	0	0	0	0	0	0	0	0	0	0	0	0	0	0	0	0	0	0	0
Rhodococcus	0	0	0	0	0	0	0	0	0	0	0	0	0	0	0	0	0	0	0	0	0	0	0	0	0	0	0	0	0	0	0	0	0	0	0	0	0	0	0	0	0	0	0	0	0	0	0	0	1.62634
Rhodoblastus	0	0	0	0	0	0	0	0	0	0	0	0	0	0	0	0	0	0	0	0	0	0	0	0	0	0	0	0	0	0	0	0	0	0	0	0	0	0	0	0	0	0	0	0	0	0	0	0	0
03196G20	0	0	0	0	0	0	0	0	0	0	0	0	0	0	0	0	0	0	0	0	0	0	0	0	0	0	0	0	0	0	0	0	0	0.322581	0	3.00544	0	0	0	0	0	0	0	0	0.57494	0.219157	0.53951	0	0
Dyadobacter	0	0	0	0	0	0	0	0	0	0	0	0	0	0	0	0	0	0	0	0	0	0	0	0	0	0	0	0	0	0	0	0	0	0.755518	0	0	0	0	0	0	0	0	0	0	0	0	0	0	0
Pseudarcicella	1.43602	0	1.56343	0.641087	0	0.433944	1.6275	0.783569	0	1.23354	0.277144	2.99903	0.901923	1.26902	1.11261	1.50689	0.767243	0.751307	2.33672	3.32691	1.05791	0.65644	0	2.23909	0	0.854535	0.608153	4.64848	0	0	0	0	0.757125	0	0	0	0	0	0	0	0	0	0	0	0	0	0	0	0
Lactobacillus	0	0	0	0	0	0	0	0.296806	0	0	0	0	0	0	0	0	0	0	0	0	0	0	0	0	0	0	0	0	0	0	0	0	0	0	0	0	0	0	0	0	0	0	0	0	0	0	0.288828	0	0
Cellulomonas	0	0	0	0	0	0	0	0	0	0	0	0	0	0	0	0	0	0	0	0	0	0	0	0	0	0	0	0	0	0	0	0	0	0	0	0	0	0	0	0	0	0	0	0	0	0	0	0	0
Pseudonocardia	0	0	0	0	0	0	0	0	0	0	0	0	0	0	0	0	0	0	0	0	0	0	0	0	0	0	0	0	0	0	0	0	0	0	0	0	0	0	0	0	0	0	0	0	0	0	0	0	0
Iamia	0	0	0	0	0	0	0	0	0	0	0	0.417142	0	0	0	0	0	0	0	0	0	0	0	0	0	0	0	0	0	0	0	1.59043	0	0	0	0	0	0	0	0	0	0	0	0	0	0	0	0	0
env.OPS17	1.88626	0	3.33858	1.31592	2.10357	1.52914	3.40296	1.73929	0.862677	1.21281	0.676557	0.210767	0.674949	0.841696	0	2.05194	0.371507	2.51524	0	2.8654	2.15558	2.61149	1.68887	1.87856	1.93105	1.02933	3.48455	0.898376	0	1.11568	0	0	0	0	0	0	0	0	0	0	0	0	0	0	0	0	0	0	0
Haematobacter	0	0	0	0	0	0	0	0	0	0	0	0	0	0	0	0	0	0	0	0	0	0	0	0	0	0	0	0	0	0	0	0	0	0	0	0	0	0	0	0	0	0	0	0	0	0	0	0	0
Reyranella	0	0	0	0	0	0	0	0	0	0	0	0	0	0	0	0	0	0	0	0	0	0	0	0	0	0	0	0	0	0	0	0	0	0	0	0	0	0	0	0	0	0	0	0	0	0	0	0	0
Ferruginibacter	0	0	0	0	0	0	0	0	0	0	0	0	0	0	0	0	0	0	0	0	0	0	0	0	0	0	0	0	1.1869	0	0	0	0	0	0	0	0	0	0	0	0	0	0	0	0	0.32229	0	0	1.20846
Chromobacterium	0	0	0	0	0	0	0	0	0	0	0	0	0	0	0	0	0	0	0	0	0	0	0	0	0	0	0	0	0	0	0	0	0	0	0	0	0	0	0	0	0	0	0	0	0	0	0	0	0
Mesorhizobium	0.620853	0	0	0	1.35876	0	0	0	0.954913	0	0	1.08457	0.507705	0	1.42456	0	0	1.14329	0.976725	0	0	0	0	0	0	0	0	0	0	0	0	0	0	0	0	0	0	0	0	0	0	0	0	0	0	0	0	0	0
NS1112marinegroup	0.819905	0	0	0.187988	0	0	0	0.439273	0.238728	1.0936	0	2.7707	0.453948	0.589187	1.06062	0	0.298821	0.577091	3.48036	2.81227	2.35444	0	0	3.12144	1.60921	2.03923	0.780736	2.17588	0.369942	0.486929	0	0	0	0	0	0	0	0	0	0	0	0	0	0	0.371125	0	0	0	0
Aurantimicrobium	0	0	0	0	0	0	0	0	0	0	0	0	0	0	0	0	0	0	0	0	0	0	0	0	0	0	0	0	0	0	0	0	0	0	0	0	0	0	0	0	0	0	0	0	0	0	0	0	0
Lysobacter	0	0	0	0	0	0	0	0	0	0	0	0	0	0	0	0	0	0	0	0	0	0	0	0	0	0	0	0	0	0	0	0	0	0	0	0	0	0	0	0	0	0	0	0	0	0	0	0	0
LWQ8	0	0	0	0	0	0	0	0	0	0	0	0	0	0	0	0	0	0	0	0	0	0	0	0	0	0	0	0	0	0	0	0	0	0	0	0	0	0	0	0	0	0	0	0	0	0	0	0	1.68563
Anaerococcus	0	0	0	0	0	0	0	0	0	0	0.0978155	0	0	0	0	0	0	0	0	0	0	0	0	0	0	0	0	0	0	0	0	0.571786	0	0	0	0	0	0	0	0	0	0	0	0	0	0	0	0	0
Aurantisolimonas	0	0	0	0	0	0	0	0	0	0	0	0	0	0	0	0	0	0	0	0	0	0	0	0	0	0	0	0	0	0	0	0	0	0	0	0	0	0	0	0	0	0	0	0	0	0	0	0	0
SJA15	0	0	0	0	0	0	0	0	0	0	0	0	0	0	0	0	0	0	0	0	0	0	0	0	0	0	0	0	0	0	0	0	0	0	0	0	0	0	0	0	0	0	0	0	0	0	0	0	0
Lacibacter	0	0	0	0	0	0	0	0	0	0	0	0	0	0	0	0	0	0	0	0	0	0	0	0	0	0	0	0	0	0	0	0	0	0	0	0	0	0	0	0	0	0	0	0	0	0	0	0	0
Sandaracinus	0	0	0	0	0	0	0	0	0	0	0	0	0	0	0	0	0	0	0	0	0	0	0	0	0	0	0	0	0	0	0	0	0	0	0	0	0	0	0	0	0	0	0	0	0	0	0	0	0
Duganella	0	0	0	4.23214	0	0	0	0	0	0	0	0	0	0	0	0	0	0	0	0	0	0	0	0	0	0	0	0	0	0	0.778884	0	0	0.254669	0	0	5.42959	1.14556	0	0.517404	3.41803	0	3.51046	0.868168	0.895872	0	0	1.23984	0
Methylocystis	0	0	0	0	0	0	0	0	0	0	0	0	0	0	0	0	0	0	0	0	0	0	0	0	0	0	0	0	0	0	0	0	0	0	0	0	0	0	0	0	0	0	0	0	0	0	0	0	0
JG30KFCM45	0	0	0	0	0	0	0	0	0	0	0	0	0	0	0	0	0	0	0	0	0	0	0	0	0	0	0	0	0	0	0	0	0	0	0	0	0	0	0	0	0	0	0	0	0	0	0	0	0
Dechloromonas	0	0	0	0	0	0	0	0	0	0	0	0	0	0	0	0	0	0	0	0	0	0	0	0	0	0	0.0164366	0	0	0	0	0	0	0	0	0	0	0	0	0	0	0	0	0	0	0	0.288828	0.496938	0
Actinomycetospora	0	0	0	0	0	0	0	0	0	0	0	0	0	0	0	0	0	0	0	0	0	0	0	0	0	0	0	0	0	0	0	0	0	0	0	0	0	0	0	0	0	0	0	0	0	0	0	0	0
Cellvibrio	0	0	0	0	0	0	0	0	0	0	0	0	0	0	0	0	0	0	0	0	0	0	0	0	0	0	0	0	0	0.0992767	0	0	0.997098	0	0	0	0	0	0	0	0	0	0	0	0	0	0	0	0
Kaistia	0	0	0	0	0	0	0	0	0	0	0	0	0	0	0	0	0	0	0	0	0	0	0	0	0	0	0	0	0	0	0	0	0	0	0	0	0	0	0	0	0	0	0	0	0	0	0	0	0
Sandaracinobacter	0	0	0	0	0	0	0	0	0	0	0	0	0	0	0	0	0	0	0	0	0	0	0	0	0	0	0	0	0	0	0	0	0	0	0	0	0	0	0	0	0	0	0	0	0	0	0	0	0
T34	0	0	0	0	0	0	0	0	0	0	0	0	0	0	0	0	0	0	0	0	0	0	0	0	0	0	0	0	0	0	0	0	0	0	0	0	0	0	0	0	0	0	0	0	0	0	0	0	0
Peredibacter	0	0	0	0	0	0	0	0	0	0	0.452396	0	0	0	0	0	0	0	0	0	0	0	0	0	0	0	0	0	0	0	0	0.0912935	0	0	0	0	0	0	0	0	0	0	0	0	0.889788	0	0	0	0.350114
AbsconditabacterialesSR1	0	0	0	0	0	0	0	0	0	0	0	0	0	0	0	0	0	0	0	0	0	0	0	0	0	0	0	0	0.169557	0	0	0	0	0.203735	0	1.83832	0	0	0	0	0	0	0	0	0	0	0	0	0
Rosenbergiella	0	0	0	0	0	0	0	0	0	0	0	0	0	0	0	0	0	0	0	0	0	0	0	0	0	0	0	0	0	0	0	0	0	0	0	0	0	0	0	0	0	0	0	0	0	0	0	0	0
Gluconobacter	0	0	0	0	0	0	0	0	0	0	0	0	0	0	0	0	0	0	0	0	0	0	0	0	0	0	0	0	0	0	0	0	0	0	0	0	0	0	0	0	0	0	0	0	0	0	0	0	0
Runella	0	0	0	0	0	0	0	0	0	0	0	0	0	0	0	0	0	0	0	0	0	0	0	0	0	0	0	0	0	0	0	0	0	0	0	0	0	0	0	0	0	0	0	0	0	0	0	0	0
Ochrobactrum	0	0	0	0	0	0	0	0	0	0	0	0	0	0	0	0	0	0	0	0	0	0	0	0	0	0	0	0	0	0	0	0	0	0	0	0	0	0	0	0	0	0	0	1.08825	0	0	0	0	0
Alkanindiges	0	0	0	0	0	0	0	0	0	0	0	0	0	0	0	0	0	0	0.537817	0	0	0	0	0	0	0	0	0	0	0	0.543295	0	0	0	0	0	0	0	0	0	0	0	0	0	0.979527	0	0	0	0
Thiothrix	0	0	0	0	0	0	0	0	0	0	0	0	0	0	0	0	0	0	0	0	0	0	0	0	0	0	0	0	0	0	0	0	0	0	0	0	0	0	0	0	0	0	0	0	0	0	0	0	0
Blfdi19	0	0	0	0	0	0	0	0	0	0	0	0	0	0	0	0	0	0	0	0	0	0	0	0	0	0	0	0	0	0	0	0	0	0	0	0	0	0	0	0	0	0	0	0	0	0	0	0	0
Prevotella	0	0	0	0	0	0	0	0	0	0	0	0	0	0	0	0	0	0	0	0	0	0	0	0	0	0	0	0	0	0	0	0	0	0	0	0	0	0	0	0	0	0	0	0	0	0	0	0	0
Altererythrobacter	0	0	0	0	0	0	0	0	0	0	0	0	0	0	0	0	0	0	0	0	0	0	0	0	0	0	0	0	0	0	0	0	0	0	0	0	0	0	0	0	0	0	0	0	0	0	0	0	0
Rubellimicrobium	0	0	0	0	0	0	0	0	0	0	0	0.197594	0	0	0	0	0	0	0	0	0	0	0	0	0	0	0	0	0	0	0	0	0	0	0	0	0	0	0	0	0	0	0	0	0	0	0	0	0
Gemmatimonas	0.478673	0	0.200858	0.265111	0.221428	0.185976	0	0.249317	0.51001	0.212501	0	0	0.376299	0.233085	0	0	0.209982	0	0.398727	0	0	0	0	0	0	0	0	0	0	0	0	0	0	0	0	0	0	0	0	0	0	0	0	0	0.381772	0	0.103542	0	0
Taibaiella	0	0	0	0	0	0	0	0	0	0	0	0	0	0	0	0	0	0	0	0	0	0	0	0	0	0	0	0	0	0	0	0	0	0	0	0	0.113365	0	0	0	0.157315	0	0	0	0	0	0	0	0
Rickettsiella	0	0	0	0	0	0	0	0	0	0	0	0	0	0	0	0	0	0	0	0	0	0	0	0	0	0	0	0	0	0	0	0	0.902225	0	0	0	0.149165	0.590963	0	0	0	1.67606	0	0.986984	0.480638	0	0	0	0
Kocuria	0	0	0	0	0	0	0	0	0	0	0	0	0	0	0	0	0	0	0	0	0	0	0	0	0	0	0	0	0	0	0	0	0.712479	0	0	0	0	0	0	0	0	0	0	0	0	0	0	0	0
Porphyrobacter	0	0	0	0	0	0	0	0	0	0	0	0	0	0	0	0	0	0	0	0	0	0	0	0	0	0	0	0	0	0.26001	0	0	0	0	0	0	0	0	0	0	0	0	0	1.03964	0	0	0	0	0
Bacteriovorax	0	0	0	0	0	0	0	0	0	0	0	0	0	0	0	0	0	0	0	0	0	0	0	0	0	0	0	0	0	0	0	0	0	0	0	0	0	0	0	0	0	0	0	0	0	0	0	0	0
Bradyrhizobium	0	0	0	0	0	0	0	0	0	0	0	0	0	0	0	0	0	0	0	0	0	0	0	0	0	0	0	0	0	0	0	0	1.01012	0	0	0.810612	0	0	0	0	0	0	2.6347	1.41229	0	0	1.3188	0	0
Exiguobacterium	0	0	0	0	0	0	0	0	0	0	0.611347	0	0	0	0	0	0	0	0	0	0	0	0	0	0	0	0	0	0	0	0	0	0	0	0	0	0	0.600055	0	0	0	0	0	0	0	0	0	0	0
OPB41	0	0	0	0	0	0	0	0	0	0	0	0	0	0	0	0	0	0	0	0	0	0	0	0	0	0	0	0	0	0	0	0	0	0	0	0	0	0	0	0	0	0	0	0	0	0	0	0	0
Rhodopseudomonas	0	0	0	0	0	0	0	0	0	0	0	0	0	0	0	0	0	0	0	0	0	0	0	0	0	0	0	0	0	0	0	0	0.457623	0	0	0	0	0	0	0	0	0	0	0	0	0	0	0	0
Romboutsia	0	0	0	0	0.563635	0	0	0	0.271282	0	0	0	0	0	0	0.436037	0	0	0	0	0	0	0	0.275142	0	0	0	0.20605	0	0	0	0	0	0.806452	0	0	0	0	0	0	0	0	0	0	0	0	0	0	0
Lonsdalea	0	0	0	0	0	0	0	0	0	0	0	0	0	0	0	0	0	0	0	0	0	0	0	0	0	0	0	0	0	0	0	0	0	0	0	0	0	0	0	0	0	0	0	0	0	0	0	0	0
Phenylobacterium	0	0	0	0	0	0	0	0	0	0	0	0	0	0.459696	0	0	0	0	0	0	0	0	0	0	0	0	4.19954	0	0	0	0	0	0	0	0	0	0	0	0	0	0	0	0	0	0	0	0	0	0
Rhodoplanes	0	0	0	0	0	0	0	0	0	0	0	0	0	0	0	0	0	0	0	0	0	0	0	0	0	0	0	0	0	0	0	0	0	0	0	0	0	0	0	0	0	0	0	0	0	0	0	0	0
3713	0	0	0	0	0	0	0	0	0	0	0	0	0	0	0	0	0	0	0	0	0	0	0	0	0	0	0	0	0	0	0	0	0	0	0	0	0	0	0	0	0	0	0	0	0	0	0	0	0
Finegoldia	0	0	0	0	0	0	0	0	0	0	0	0	0	0	0	0	0	0	0	0	0	0	0	0	0	0	0	0	0	0	0	0	0	0	0	0	0	0	0	0	0	0	0	0	0	0	0	0	0
Patulibacter	0	0	0	0	0	0	0	0	0	0	0	0	0	0	0	0	0	0	0	0	0	0	0	0	0	0	0	0	0	0	0	0	0	0	0	0	0	0	0	0	0	0	0	0	0	0	1.11172	0.250979	0
Terrimonas	0	0	0	0	0	0	0	0	0	0	0	0	0	0	0	0	0	0	0	0	0	0	0	0	0	0	0	0	0	0	0	0	0	0	0	4.02916	0	0	0	0	0	0	0	0	0	0	0	0	0
Xanthomonas	0	0	0	0	0	0	0	0	0	0	0	0	0	0	0	0	0	0	0	0	0	0	0	0	0	0	0	0	0	0	0	0	0	0	0	0	0	0	0	0	0	0	0	0	0	0	0	0	0
Rhodoluna	0	0	0	0	0	0	0	0	0	0	0	0	0	0	0	0	0	0	0	0	0	0	0	0	0	0	0	0	0	0	0	0	0	0	0	0	0	0	0	0	0	0	0	0	0.740729	0	0	0	0
Vicinamibacteraceae	0	0	0.146572	0	0.322077	0	0	0	0	0	0	0	0	0	0	0	0	0	0	0	0	0	0	0	0	0	0	0	0	0	0	0	0	0	0	1.54753	0	0	0	0	0	0	0	0	0	0	0	0	0
Blastocatella	0	0	0	0	0	0	0	0	0	0	0	0	0	0	0	0	0	0	0	0	0	0	0	0	0	0	0	0	0	0	0	0.499712	0	0	0	0	0	0	0	0	0	0	0	0	0	0	0	0	0
Paludibacter	0	0	0	0	0	0	0	0	0	0	0	0	0	0	0	0	0	0	0	0	0	0	0	0	0	0	0	0	0	0	0	0	0	0	0	0	0	0	0	0	0	0	0	0	0	0	0	0	0
Ornithinibacter	0	0	0	0	0	0	0	0	0	0	0	0	0	0	0	0	0	0	0	0	0	0	0	0	0	0	0	0	0	0	0	0	0	0	0	0	0	0	0	0	0	0	0	0	0	0	0	0	0
Acidiphilium	0	0	0	0	0	0	0	0	0	0	0	0	0	0	0	0	0	0	0	0	0	0	0	0	0	0	0	0	0	0	0	0	0	0	0	0	0	0	0	0	0	0	0	0	0	0	0	0	0
Aureimonas	0	0	0	0	0	0	0	0	0	0	0	0	0	0	0	0	0	0	0	0	0	0	0	0	0	0	0	0	0	0	0	0	0	0	0	0	0	0	0	0	0	0	0	0	0	0	0	0	0
UKL131	0	0	0	0	0	0	0	0	0	0	0	0	0	0	0	0	0	0	0	0	0	0	0	0	0	0	0	0	0	0	0	0	0	0	0	0	0	0	0	0	0	0	0	0	0	0	0	0	0
Diaphorobacter	0	0	0	0	0	0	0	0	0	0	0	0	0	0	0	0	0	0	0	0	0	0	0	0	0	0	0	0	0	0	0	0	0	0	0	0	0	0	0	0	0	0	0	0	0	0	0	0	0
Streptomyces	0	0	0	0	0	0	0	0	0	0	0	0	0	0	0	0	0	0	0.383272	0	0	0	0	0	0	0	0	0	0	0	0	0.872093	0	0	0	0	0	0	0	0	0	0	0	0	0	0	0	0	0
Beijerinckia	0	0	0	0	0	0	0	0	0	0	0	0	0	0	0	0	0	0	0	0	0	0	0	0	0	0	0	0	0	0	0	0	0	0	0	0	0	0	0	0	0	0	0	0	0	0	0	0	0
Bacteroides	0	0	0	0	0	0	0	0	0	0	0	0	0	0	0	0	0	0	0	0	0	0	0	0	0	0	0	0	0	0	0	0	0	0	0	0	0	0	0	0	0	0	0	0	0	0	0	0	0
Nubsella	0	0	0	0	0	0	0	0	0	0	0	0	0	0	0	0	0	0	0	0	0	0	0	0	0	0	0	0	0	0	0	0	0	0	0	0	0	0	0	0	0	0	0	0	0	0	0	0	0
Deinococcus	0	0	0	0	0	0	0	0	0	0	0	0.373233	0	0	0	0	0	0	0.0803635	0.989442	0.692014	0.606493	0	0.237192	0	0	0.353386	0.638754	0	0	0	0	0	0	0	0	0	0	0	0	0	0	0	0	0	0	0	0	0
Asticcacaulis	0	0	0	0	0	0	0	0	0	0	0	0	0	0	0	0	0	0	0	0	0	0	0	0	0	0	0	0	0	0	0	0	0	0	0	0	0	0	0	0	0	0	0	0	0	0	0	0	0
Paenibacillus	0	0	0	0	0	0	0	0	0	0	0	0	0	0	0	0	0	0	0	0	0	0	0	0	0	0	0	0	0	0	0	1.10994	0.989657	0	0	0	0	0	0	0	0	0	0	0	0	0	0	0	0
Sanguibacter	0	0	0	0	0	0	0	0	0	0	0	0	0	0	0	0	0	0	0	0	0	0	0	0	0	0	0	0	0	0	0	0	0	0	0	0	0	0	0	0	0	0	0	0	0	0	0	0	0
Clostridiumsensustricto13	0	0	0	0	0	0	0	0	0	0	0	0	0	0	0	0	0	0	0.315272	0.800186	0	0	0	0	0	0	0	0.597544	0	0	0	0	0	0	0	0	0	0	0	0	0	0	0	0	0	0	0	0	0
SM2D12	0	0	0	0	0	0	0	0	0	0	0	0	0	0	0	0	0	0	0	0	0	0	0	0	0	0	0	0	0	0	0	0	0	0	0	0	0	0	0	0	0	0	0	0	0	0	0	0.461801	0
Kluyvera	0	0	0	0	0	0	0	0	0	0	0	0	0	0	0	0	0	0	0	0	0	0	0	0	0	0	0	0	0	0	0	0	0	0	0	0	0	0	0	0	0	0	0	0	0	0	0	0	0
Gastranaerophilales	0	0	0	0	0	0	0	0	0	0	0	0	0	0	0	0	0	0	0	0	0	0	0	0	0	0	0	0	0	0	0	0	0	0	0	0	0	0	0	0	0	0	0	0.81146	0.209899	0	0	0	0
Pelomonas	0.28436	0.814907	0	3.20062	0.714609	0	0	0.641102	0.54799	0.658236	6.59439	0	0.155298	3.45096	0.811064	0.282142	0	0.522648	0.482181	2.11833	1.16927	4.81627	3.53725	1.78368	2.00257	1.06817	5.06246	1.32284	0.138728	0	0	0	0	0.916808	0	0	0	0	0	0	0	0	0	0	0	0	0	0	0
Sericytochromatia	0	0	0	0	0	0	0	0	0	0	0	0	0	0	0	0	0	0	0	0	0	0	0	0	0	0	0	0	0	0	0	0	0	0	0	0	0	0	0	0	0	0	0	0	0	0	0	0	0
Curvibacter	4.30332	0	5.80859	7.55326	4.13165	6.40584	5.19582	7.4261	7.56334	6.53053	0	0	4.98148	11.6089	0	5.01443	7.14747	5.76546	1.54236	4.31968	12.4085	8.76918	16.0349	5.61195	12.745	14.6048	11.6946	6.04137	0	0	0	0	0	0	0	0	1.67064	0	0	0	0.724603	0	3.27297	1.22327	0	0	0.485014	1.21976	0
Mucilaginibacter	0	0	0	0	0	0	0	0	0	0	0	0	0	0	0	0	0	0	0	0	0	0	0	0	0	0	0	0	0	0	0	0	0	0	0	0	0	0	0	0	0	0	0	0	0	0	0	0	0
Longivirga	0	0	0.124857	0	0	0	0	0	0	0	0	0.184421	0	0	0	0	0	0	0	0	0	0	0	0	0	0	0	0	0	0	0	0	0	0	0	0	0	0	0	0	0	0	0	0	0	0	0	0	0
Bryobacter	0	0	0	0	0	0	0	0	0.265856	0	0	0	0	0	0	0	0	0	0	0	0	0	0	0	0	0	0	0	0	0	0	0	0	0	0	0	0	0	0	0	0	0	0	0	0.293554	0	0	0	0
Fibrella	0	0	0	0	0	0	0	0	0	0	0	0	0	0	0	0	0	0	0	0	0	0	0	0	0	0	0	0	0	0	0	0	0	0	0	0	0	0	0	0	0	0	0	0	0	0	0	0	0
Blastococcus	0	0	0	0	0	0	0	0	0	0	0	0	0	0	0	0	0	0	0	0	0	0	0	0	0	0	0	0	0	0	0	0	0	0	0	0	0	0	0	0	0	0	0	0	0	0	0	0	0
Inhella	0	0	0	0	0	0	0	0	0	0	0	0	0	0	0	0	0	0	0	0	0	0	0	0	0	0	0	0	0	0	0	0	0	0	0	0	0	0	0	0	0	0	0	0	0	0	0	0	0
A4b	0	0	0	0	0	0	0	0	0	0	0	0	0	0	0	0	0	0	0	0	0	0	0	0	0	0	0	0	0	0	0	0	1.69842	0	0	0	0	0	0	0	0	0	0	0	0	0	0	0	0
Hirschia	1.36493	0	0.369144	0.351875	0	0	0.591819	0	0	0.839639	1.17379	0.36006	0.722733	0	0	0.52581	0	0.593423	0.352363	0	0	0	0	0	0	0	0	0	0	0	0	0	0	0	0	0	0	0	0	0	0	0	0	0	0.247924	0	0	0	0
Haemophilus	0	0	0	0	0	0	0	0	0	0	0	0	0	0	0	0	0	0	0	0	0	0	0	0	0.457731	0	0	0	0	0	0	1.38862	0	0	0	0	0	0	0	0	0	0	0	0	0	0	0	0	0
Prosthecobacter	0.227488	0.133435	0.456001	0	0.261688	0.475272	0.317668	0.385848	0.184472	0.383539	0	0	0	0.375526	0	0.359089	0.250363	0.391986	0	0	0	0	0	0	0	0	0	0	0	0	0	0	0	0	0	0	0	0	0	0	0	0	0	0	0	0	0	0	0
Hyphomicrobium	0	0	0	0	0	0	0	0	0	0	0	0	0	0	0	0	0	0	0	0	0	0	0	0	0	0	0	0	0	0	0	0	0	0	0	0	0	0	0	0	0	0	0	0	0	0	0	0	0
BurkholderiaCaballeroniaParaburkholderia	0	0	0	0	0	0	0	0	0	0	0	0	0	0	0	0	0	0	0	0	0	0	0	0	0	0	0	0	0	0	0	0	0	0	0	0	0	0	0	0	0	0	0	1.30428	0	0	0	0	0
Lactococcus	0	0	0	0	0	0	0	0	0	0	0	0	0	0	0	0	0	0	0	0	0	0	0	0	0	0	0	0	0	0	0	1.39343	0	0	0	0	0	0	0	0	0	0	0	0	0	0	0	0	0
P3OB42	0	0	0	0	0	0	0	0	0	0	0	0	0	0	0	0	0	0	0	0	0	0	0	0	0	0	0	0	0	0	0	0	0	0	0	0	0	0	0	0	0	0	0	0	0	0	0	0	0
Arthrobacter	0	0	0	0	0	0	0	0	0	0	0	0	0	0	0	0	0	0	0	0	0	0.499465	0.131357	0	0	0	0.657462	0	0	0	0	0	0	0	0	0	0	0	0	0	0	0	0	0	0	0	0	0	0
Trichococcus	0	0	0	0	0	0	0	0	0	0	0	0	0	0	0	0	0	0	0	0	0	0	0	0	0	0	0	0	0	0	0	0	0	0	0	0	0	0	0	0	0	0	0	0	0	0	0	0	0
Niveispirillum	0	0	0	0	0	0	0	0	0	0	0	0	0	0	0	0	0	0	0	0	0	0	0	0	0	0	0	0	0	0	0	0.569383	0	0	0	0	0	0	0	0	0	0	0	0	0	0	0	0	0
Peptoclostridium	0	0	0	0	0	0	0	0	0	0	0	0	0	0	0	0	0	0	0.262727	0	0	0	0	0	0	0	0	0	0	0	0	0	0	0	0	0	0	0	0	0	0	0	0	0	0	0	0	0	0
CandidatusMegaira	0	0	0	0	0	0	0	0	0	0	0	0	0	0	0	0	0	0	0	0	0	0	0	0	0	0	0	0	0	0	0	0	0	0	0	2.0574	0	0	0	0	0	0	0	0	0	0	0	0	0
Ralstonia	0	0	0	0	0	0	0	0	0	0	0	0	0	0	0	0	0	0	0	0	0	0	0	0	0	0	0	0	0	0	0	0	0	0	0.0191755	0	0	0	0	0	0	0	0	0	0	0	0	0	0
Acetobacter	0	0	0	0	0	0	0	0	0	0	0	0	0	0	0	0	0	0	0	0	0	0	0	0	0	0	0	0	0	0	0	0	0	0	0	0	0	0	0	0	0	0	0	0	0	0	0	0	0
Turicibacter	0	0	0	0	0	0	0	0	0	0	0	0	0	0	0	0	0	0	0	0	0	0	0	0	0	0	0	0	0	0	0	0	0	0	0	0	0	0	0	0	0	0	0	0	0	0	0	0	0
Brachybacterium	0	0	0	0	0	0	0	0	0	0	0	0	0	0	0	0	0	0	0	0	0	0	0	0	0	0	0	0	0	0	0	1.9508	0	0	0	0	0	0	0	0	0	0	0	0	0	0	0	0	0
Alcanivorax	0	0	0	0	0	0	0	0	0	0	0	0	0	0	0	0	0	0	0	0	0	0	0	0	0	0	0	0	0	0	0	0	0.768286	0	0	0	0	0	0	0	0	0	0	1.36504	0	0	0	0	3.24138
Arcticibacter	0	0	0	0	0	0	0	0	0	0	0	0	0	0	0	0	0	0	0	0	0	0	0	0	0	0	0	0	0	0	0	0	0	0	0	0	0	0	0	0	0	0	0	0	0	0	0	0	0
Alloprevotella	0	0	0	0	0	0	0	0	0	0	0	0	0	0	0	0	0	0	0	0	0	0	0	0.109108	0	0	0	0	0	0	0	0	0	0.398981	0	0	0	0	0	0	0	0	0	0	0	0	0	0	0
Azonexus	0	0	0	0	0	0	0	0	0	0	0	0	0	0	0	0	0	0	0	0	0	0	0	0	0	0	0	0	0	0	0	0	0	0	0	0	0	0	0	0	0	0	0	0	0	0	0	0	0
Blautia	0	0	0	0	0	0	0	0	0	0	0	0	0	0	0	0	0	0	0	0	0	0	0	0	0	0	0	0	0	0	0	0	0	0	0	0	0	0	0	0	0	0	0	0	0	0	0	0	0
Moraxella	0	0	0	0	0	0	0	0	0	0	0	0	0	0	0	0	0	0	0	0	0	0	0	0	0	0	0	0	0	0	0	0	0	0	0	0	0	0	0	0	0	0	0	0.874919	0	0	0	0	0
Achromobacter	0	0	0	0	0	0	0	0	0	0	0	0	0	0	0	0	0	0	0	0	0	0	0	0	0	0	0	0.560455	0.26975	0	0	0	0.050227	0	0	4.07098	0	0	0	0	0	0.122815	0	0	0	0	0	0	0
Muribaculaceae	0	0	0	0	0	0	0	0	0	0	0	0	0	0	0	0	0	0	0	0	0	0	0	0	0	0	0	0	0	0	0	0	0	0	0	0	0	0	0	0	0	0	0	0	0	0	0	0	0
Aeromicrobium	0	0	0	0	0	0	0	0	0	0	0	0	0	0	0	0	0	0	0	0	0	0	0	0	0	0	0	0	0	0	0	0	0	0	0	0	0	0	0	0	0	0	0	0	0	0	0	0	0
Turicella	0	0	0	0	0	0	0	0	0	0	0	0	0	0	0	0	0	0	0	0	0	0	0	0	0	0	0	0	0	0	0	0	0	0	0	0	0	0	0	0	0	0	0	0	0	0	0	0	0
Paraclostridium	0	0	0	0	0	0	0	0	0	0	0	0	0	0	0	0	0	0	0	0	0	0	0	0	0	0	0	0	0	0	0	0	0	0	0	0	0	0	0	0	0	0	0	0	0	0	0	0	0
Microbacterium	0	0	0	0	0	0	0	0	0	0	0	0	0	0	0	0	0	0	0	0	0	0	0	0	0	0	0	0	0	0	0	0	0	0	0	0.0956004	0	0	0	0	0	0	0	0	0	0	0	0	0
CandidatusMidichloria	0	0	0	0	0	0	0	0	0	0	0	0	0	0	0	0	0	0	0	0	0	0	0	0	0	0	0	0	0	0	0	0	0	0	0	0	0	0	0	0	0	0	0	0	0	0	0	0	0
Phaselicystis	0	0	0	0	0	0	0	0	0	0	0	0	0	0	0	0	0	0	0	0	0	0	0	0	0	0	0	0	0	0	0	0	0	0	0	0	0	0	0	0	0	0	0	0	0	1.34717	0.93733	2.8712	0
UnknownFamily	0	0	0	0	0	0	0	0	0	0	0	0	0	0	0	0	0	0	0	0	0	0	0	0	0	0	0	0	0	0	0	0.655872	0	0	0	0	0	0	0	0	0	0	0	0	0.238798	0	0	0	0
6714	0	0	0	0	0	0	0	0	0	0	0	0	0	0	0	0	0	0	0	0	0	0	0	0	0	0	0	0	0	0	0	0	0	0	0	0	0	0	0	0	0	0	0	0	0	0	0	0	0
Peptoniphilus	0	0	0	0	0	0	0	0	0	0	0	0.13612	0	0	0	0	0	0	0.160727	0	0	0	0	0	0	0	0	0	0	0	0	0	0	0	0	0	0	0	0	0	0	0	0	0	0	0	0	0	0
Silanimonas	0	0	0	0	0	0	0	0	0	0	0.395337	0	0	0	0	0	0	0	0	0	0	0	0	0	0	0	0	0	0	0	0	0	0	0	0.162991	0	0	0	0	0	0	0	0	0	0	0	0	0	0
Luteimonas	0	0	0	0	0	0	0	0	0	0	0	0	0	0	0	0	0	0	0	0	0	0	0	0	0	0	0	0	0	0	0	0	0	0	0	0	0	0	0	0	0	0	0	0	0	0	0	0	0
ClostridiaUCG014	0	0.0905452	0	0	0	0	0	0	0.151918	0	0	0.0746465	0	0	0	0	0	0	0	0.454877	0	0	0	0	0	0	0	0	0	0	0	0	0	0	0	0	0	0	0	0	0	0	0	0	0	0	0	0	0
Fusobacterium	0	0	0	0	0	0	0	0	0	0	0	0	0	0	0	0	0	0	0	0	0	0	0	0	0	0	0	0	0	0	0	0	0	0	0	0	0	0	0	0	0	0	0	0	0	0	0	0	0
Phaeospirillum	0	0	0	0	0	0	0	0	0	0	0	0	0	0	0	0	0	0	0	0	0	0	0	0	0	0	0	0	0	0	0	0	0	0	0	0	0	0	0	0	0	0	0	0	0	0	0	0	0
Acetobacterium	0	0	0	0	0	0	0	0	0	0	0	0	0	0	0	0	0	0	0	0	0	0	0	0	0	0	0	0	0	0	0	0	0	0	0	0	0	0	0	0	0	0	0	0	0	0	0	0	0
Tepidimonas	0	0	0	0	0	0	0	0	0	0	0	0	0	0	0	0	0	0	0	0	0	0	0	0	0	0	0	0	0	0	0	0	0	0	0	0	0	0	0	0	0	0	0	0	0	0	0	0	0
Paeniclostridium	0	0	0	0	0	0	0	0	0	0	0	0	0	0	0	0	0	0	0	0	0	0.442383	0	0	0	0	0	0	0	0	0	0	0	0	0	0	0	0	0	0	0	0	0	0	0	0	0	0	0
Filimonas	0	0	0	0	0	0	0	0	0	0	0	0	0	0	0	0	0	0	0	0	0	0	0	0	0	0	0	0	0	0	0	0	0	0	0	0	0	0	0	0	0	0	0	0	0	0	0	0	0
Williamsia	0	0	0	0	0	0	0	0	0	0	0	0	0	0	0	0	0	0	0	0	0	0	0	0	0	0	0	0	0	0	0	0	0	0	0	1.88612	0	0	0	0	0	0	0	0	0	0	0	0	0
Piscinibacter	0	0	0	0	0	0	0	0	0	0	0	0	0	0	0	0	0	0	0	0	0	0	0	0	0	0	0	0	0	0	0	0	0	0	0	0	0	0	0	0	0	0	0	0	0	0	0	0	0
mle127	0	0	0	0	0	0	0	0	0	0	0	0	0	0	0	0	0	0	0	0	0	0	0	0	0	0	0	0	0	0	0	0	0	0	0	0	0	0.227293	0	0	0	0	0	0	0	0	0	0	0
Conexibacter	0	0	0	0	0	0	0	0	0	0	0	0	0	0	0	0	0	0	0	0	0	0	0	0	0	0	0	0	0	0	0	0	0	0	0	0	0	0	0	0	0	0	0	0	0	0	0	0	0
Kineococcus	0	0	0	0	0	0	0	0	0	0	0	0	0	0	0	0	0	0	0	0	0	0	0	0	0	0	0	0	0	0	0	0	0	0	0	0	0	0	0	0	0	0	0	0	0	0	0	0	0
Neisseria	0	0	0	0	0	0	0	0	0	0	0	0	0	0	0	0	0	0	0	0	0	0	0	0	0.128737	0	0	0	0	0	0	0	0	0	0	0	0	0	0	0	0	0	0	0	0	0	0	0	0.186351
Gemella	0	0	0	0	0	0	0	0	0	0	0	0	0	0	0	0	0	0	0	0	0	0	0	0	0	0	0	0	0	0	0	0	0	0.263158	0	0	0	0	0	0	0	0	0	0	0	0	0	0	0
Bifidobacterium	0	0	0	0	0	0	0	0	0	0	0	0	0	0	0	0	0	0	0	0	0	0	0	0	0	0	0	0	0	0	0	0	0	0	0	0	0	0	0	0	0	0	0	0	1.39932	0	0	0	0
Aquicella	0	0	0	0	0	0	0	0	0	0	0	0	0	0	0	0	0	0	0	0	0	0	0	0	0	0	0	0	0	0	0	0	0	0	0	0	0	0	0	0	0	0	0	0	0	0	0	0	0
Haliangium	0	0	0	0	0	0	0	0	0	0	0	0	0	0	0	0	0	0	0	0	0	0	0	0	0	0	0	0	0	0	0	0	0.883622	0	0	0	0	0	0	0	0	0	0	0	0	0	0	0	0
Veillonella	0	0	0	0	0	0	0	0	0	0	0	0	0	0	0	0	0	0	0	0	0	0	0	0	0	0	0	0	0	0	0	0	1.28916	0	0	0	0	0	0	0	0	0	0	0	0	0	0	0	0
Granulicatella	0	0	0	0	0	0	0	0	0	0	0	0	0	0	0	0	0	0	0	0	0	0	0	0	0	0	0	0	0	0	0	0.206612	0	0	0	0	0	0	0	0	0	0	0	0	0	0	0	0	0
Allobaculum	0	0	0	0	0	0	0	0	0	0	0	0	0	0	0	0	0	0	0	0	0	0	0	0	0	0	0	0	0	0	0	0	0	0	0	0	0	0	0	0	0	0	0	0	0	0	0	0	0
Rothia	0	0	0	0	0	0	0	0	0	0	0	0	0	0	0	0	0	0	0	0	0	0	0	0	0	0	0	0	0	0	0	0	0	0	0	0	0	0	0	0	0	0	0	0	0	0	0	0	0
Dechlorobacter	0	0	0	0	0	0	0	0	0	0	0	0	0	0	0	0	0	0	0	0	0	0	0	0	0	0	0	0	0	0	0	0	0	0	0	0	0	0	0	0	0	0	0	0	0	0	0	0	0
CandidatusPeribacteria	0	0	0	0	0	0	0	0	0	0	0	0	0	0	0	0	0	0	0	0	0	0	0	0	0	0	0	0	0	0	0	0.144148	0	0	0	0	0	0	0	0	0	0	0	0	0	0	0	0	0
Crocinitomix	0	0	0	0	0	0	0	0	0	0	0	0	0	0	0	0	0	0	0	0	0	0	0	0	0	0	0	0	0	0	0	0	0	0	0	0	0	0	0	0	0	0	0	0	0	0	0	0	0
Dialister	0	0	0	0	0	0	0	0	0	0	0	0	0	0	0	0	0	0	0	0	0	0	0	0	0	0	0	0	0	0	0	0	0	0	0	0	0	0	0	0	0	0	0	0.261936	0	0	0	0	0
Arenimonas	0	0	0	0	0	0	0	0	0	0	0	0	0	0	0	0	0	0	0	0	0	0	0	0	0	0	0	0	0	0	0	0	0	0	0	0	0	0	0	0	0	0	0	0	0	0	0	0	0
Gemmobacter	0	0	0	0	0	0	0	0	0	0	0	0	0	0	0	0	0	0	0	0	0	0	0	0	0	0	0	0	0	0	0	0	0	0	0	0	0	0	0	0	0	0	0	0	0	0	0	0	0
Endobacter	0	0	0	0	0	0	0	0	0	0	0	0	0	0	0	0	0	0	0	0	0	0	0	0	0	0	0	0	0	0	0	0	0	0	0	0	0	0	0	0	0	0	0	0	0	0	0	0	0
Polaromonas	5.81991	3.60274	3.84887	4.55992	4.76071	7.14286	4.29504	2.8256	5.30628	4.72168	0	1.42707	1.06917	4.80414	0	5.97627	3.39202	5.09582	1.38782	0	5.61565	0	1.97035	2.46679	0	0	1.78337	0	0	0	0	0	0	0	0	0	0	0	0	0	0	0	0	0	0	0	0	0	0
Aquitalea	0	0	0	0	0	0	0	0	0	0	0	0	0	0	0	0	0	0	0	0	0	0	0	0	0	0	0	0	0	0	0	0	0	0	0	0	6.09189	0.727339	0	0	0	0	7.39201	1.51086	0	0	0	0	0
Silvanigrella	0	0	0	0	0	0	0	0	0	0	0	0	0	0	0	0	0	0	0	0	0	0	0	0	0	0	0	0	0	0	0	0	0	0	0	0	0	0	0	0	0	0	0	0	0	0	0	0	0
Alteromonas	0	0	0	0	0	0	0	0	0	0	0	0	0	0	0	0	0	0	0	0	0	0	0	0	0	0	0	0	0	0	0	0	0	0	0	0	0	0	0	0	0	0	0	0	0	0	0	0	0
Actinomyces	0	0	0	0	0	0	0	0	0	0	0	0	0	0	0	0	0	0	0	0	0	0	0	0	0	0	0	0	0	0	0	0.775995	0	0	0	0	0	0	0	0	0	0	0	0	0	0	0	0	0
Brevibacterium	0	0	0	0	0	0	0	0	0	0	0	0	0	0	0	0	0	0	0	0	0	0	0	0	0	0	0	0	0	0	0	0	0	0	0	0	0	0	0	0	0	0	0	0	0	0	0	0	0
Granulicella	0	0	0	0	0	0	0	0	0	0	0	0	0	0	0	0	0	0	0	0	0	0	0	0	0	0	0	0	0	0	0	0	0	0	0	0	0	0	0	0	0	0	0	0	0	0	0	0	0
Janthinobacterium	0	0	0	0	0	0	0	0	0	0	0	0	0	0	0	0	0	0	0	0	0	0	0	0	0	0	0	0	0	0	0	0	1.77097	0	0	0	0	0	0	0	0	0	0	0	0	0	0	0	0
Gordonia	0	0	0	0	0	0	0	0	0	0	0	0	0	0	0	0	0	0	0	0	0	0	0	0	0	0	0	0	0	0	0	0	0	0	0	0	0	0	0	0	0	0	0	0	0	0	0	0	0
Mycoplasma	0	0	0	0	0	0	0	0	0	0	0	0	0	0	0	0	0	0	0	0	0	0	0	0	0	0	0	0	0	0	0	0.557371	0	0	0	0	0	0	0	0	0	0	0	0	0	0	0	0	0
Providencia	0	0	0	0	0	0	0	0	0	0	0	0	0	0	0	0	0	0	0	0	0	0	0	0	0	0	0	0	0	0	0	0	0	0	0	0	0	0	0	0	0	0	0	0	0	0	0	0	0
Methyloversatilis	0	0	0	0	0	0	0	0	0	0	0	0	0	0	0	0	0	0	0	0	0	0	0	0	0	0	0	0	0	0	0	0	0	0	0	0	0	0	0	0	0	0	0	0	0	0	0	0	0
Ilumatobacter	0	0	0	0	0	0	0	0	0	0	0	0	0	0	0	0	0	0	0	0	0	0	0	0	0	0	0	0	0	0	0	0	0	0	0	0	0	0	0	0	0	0	0	0	0	0	0	0	0
Marinomonas	0	0	0	0	0	0	0	0	0	0	0	0	0	0	0	0	0	0	0	0	0	0	0	0	0	0	0	0	0	0	0	0	0	0	0	0	0	0	0	0	0	0	0	0	0	0	0	0	0
GittGS136	0	0	0	0	0	0	0	0	0	0	0	0	0	0	0	0	0	0	0	0	0	0	0	0	0	0	0	0	0	0	0	0	0	0	0	0	0	0	0	0	0	0	0	0	0	0	0	0	0
Bradymonadales	0	0	0	0	0	0	0	0	0	0	0	0	0	0	0	0	0	0	0	0	0	0	0	0	0	0	0	0	0	0	0	0	0	0	0	0	0	0	0	0	0	0	0	0	0.596234	0	0	0	0
Turneriella	0	0	0	0	0	0	0	0	0	0	0	0	0	0	0	0	0	0	0	0	0	0	0	0	0	0	0	0	0	0	0	0	0.972915	0	0	0	0	0	0	0	0	0	0	0	0	0	0.13079	0	0
Malikia	0	0	0	0	0	0	0	0	0	0	0	0	0	0	0	0	0	0	0	0	0	0	0	0	0	0	0	0	0	0	0	0	0	0	0	0	0	0	0	0	0	0	0	0	0	0	0	0	0
Pelosinus	0	0	0	0	0	0	0	0	0	0	0	0	0.11946	0	0	0	0	0	0	0	0	0	0	0	0	0	0	0	0	0	0	0	0	0	0	0	0	0	0	0	0	0	0	0	0	0	0	0	0
Gardnerella	0	0	0	0	0	0	0	0	0	0	0	0	0	0	0	0	0	0	0	0	0	0	0	0	0	0	0	0	0	0	0	0	0	0	0	0	0	0	0	0	0	0	0	0	0	0	0	0	0
1124	0	0	0	0	0	0	0	0	0	0	0	0	0	0	0	0	0	0	0	0	0	0	0	0	0	0	0	0	0	0	0	1.73217	0	0	0	0	0	0	0	0	0	0	0	0	0	0	0	0	1.10117
Sulfitobacter	0	0	0	0	0	0	0	0	0	0	0	0	0	0	0	0	0	0	0	0	0	0	0	0	0	0	0	0	0	0	0	0	0	0	0	0	0	0	0	0	0	0	0	0	0	0	0	0	0
Enterococcus	0	0	0	0	0	0	0	0	0	0	0	0	0	0	0	0	0	0	0	0	0	0	0	0	0	0	0	0	0	0	0	0	0	0	0	0	0	0	0	0	0	0	0	0	0	0.309398	0	0	0
Dolosigranulum	0	0	0	0	0	0	0	0	0	0	0	0	0	0	0	0	0	0	0	0	0	0	0	0	0	0	0	0	0	0	0	0	0	0	0	0	0	0	0	0	0	0	0	0	0	0	0	0	0
UBA12409	0.123223	0.519443	0	0.23619	0	0.675024	0.339426	0	0.24958	0.373173	0.358657	2.34478	0.824274	0.220136	0	0.436037	0.468422	0.506315	3.04763	0.222458	0	0	0	0	0	0	0	0	0	0	0	0	0	0.24618	0	0	0	0	0	0	0	0	0	0	0	0	0	0	0
Amycolatopsis	0	0	0	0	0	0	0	0	0	0	0	0	0	0	0	0	0	0	0	0	0	0	0	0	0	0	0	0	0	0	0	0	0	0	0	0	0	0	0	0	0	0	0	0	0	0	0	0	0
Solirubrobacter	0	0	0	0	0	0	0	0	0	0	0	0	0	0	0	0	0	0	0	0	0	0	0	0	0	0	0	0	0	0	0	0	0	0	0	0	0	0	0	0	0	0	0	0	0	0	0	0	0
hgcIclade	0	0	0	0	0	0	0	0	0	0	0	0	0	0	0	0	0	0	0	0	0	0	0	0	0	0	0	0	0	0	0	0	0	0	0	0	0	0	0	0	0	0	0	0	0	0	0	0	0
Hyphomonas	0	0	0	0	0	0	0	0	0	0	0	0	0	0	0	0	0	0	0	0	0	0	0	0	0	0	0	0	0	0	0	0	0	0.339559	0	0	0	0	0	0	0	0	0	0	0	0	0	0	0
Psychrobacter	0	0	0	0	0	0	0	0	0	0	0	0	0	0	0	0	0	0	0	0	0	0	0	0	0	0	0	0	0	0	0	0	0	0	0	0	0	0	0	0	0	0	0	0	0	0	0	0	0
Pseudorhodoferax	0	0	0	0	0	0	0	0	0	0	0	0	0	0	0	0	0	0	0	0	0	0	0	0	0	0	0	0	0	0	0	0	0	0	0	0	0	0	0	0	0	0	0	0	0	0	0	0	0
Lentimicrobium	0	0	0	0	0	0	0	0	0	0	0	0	0	0	0	0	0	0	0	0	0	0	0	0	0	0	0	0	0	0	0	0	0	0	0	0	0	0	0	0	0	0	0	0	0	0	0	0	0
Terrimicrobium	0	0	0	0	0	0	0	0	0	0	0	0	0	0	0	0	0	0	0	0	0	0	0	0	0	0	0	0	0	0	0	0	0	0	0	0	0	0	0	0	0	0	0	0	0	0	0	0	0
Nannocystis	0	0	0	0	0	0	0	0	0	0	0	0	0	0	0	0	0	0	0	0	0	0	0	0	0	0	0	0	0	0	0	0	0	0	0	0	0	0	0	0	0	0	0	0	0	0	0	0	0
Rurimicrobium	0	0	0	0	0	0	0	0	0	0	0	0	0	0	0	0	0	0	0	0	0	0	0	0	0	0	0	0	0	0.307285	0	0	0	0	0	0	0	0	0	0	0	0	0	0	0	0	0	0	0
Microvirga	0	0	0	0	0	0	0	0	0	0	0	0	0	0	0	0	0	0	0	0	0	0	0	0	0	0	0	0	0	0	0	0	0	0	0	0	0	0	0	0	0	0	0	0	0	0	0	0	0
Ornithinimicrobium	0	0	0	0	0	0	0	0	0	0	0	0	0	0	0	0	0	0	0	0	0	0	0	0	0	0	0	0	0	0	0	0	0	0	0	0	0	0	0	0	0	0	0	0	0	0	0	0	0
Oligoflexus	0	0	0	0	0	0	0	0	0	0	0	0	0	0	0	0	0	0	0	0	0	0	0	0	0	0	0	0	0	0	0	0	0	0	0	0	0	0	0	0	0	0	0	0	0	0	0	0	0
KD496	0	0	0	0	0	0	0	0	0	0	0	0	0	0	0	0	0	0	0	0	0	0	0	0	0	0	0	0	0	0	0	0	0	0	0	0	0	0	0	0	0	0	0	0	0	0.309398	0	0	0
GKS98freshwatergroup	0	0	0	0	0	0	0	0	0	0	0	0	0	0	0	0	0	0	0	0.35859	0	0	0	0	0	0	0	0	0	0	0	0	0	0	0	0	0	0	0	0	0	0	0	0	0	0.393193	0	0.165646	0
Aerococcus	0	0	0	0	0	0	0	0	0	0	0	0	0	0	0	0	0	0	0	0	0	0	0	0	0	0	0	0	0	0	0	0	0	0	0	0	0	0	0	0	0	0	0	0	0	0	0	0	0
Babeliales	0	0	0	0	0	0	0	0	0	0	0	0	0	0	0	0	0	0	0	0	0	0	0	0	0	0	0	0	0	0	0	0	0	0	0	0	0	0	0	0	0	0	0	0	0	0.186928	0.196185	0	0
Citrobacter	0	0	0	0	0	0	0	0	0	0	0	0	0	0	0	0	0	0	0	0	0	0	0	0	0	0	0	0	0	0	0	0	0	0	0	0	0	0.645513	0	1.6698	0	0	0	0	0	0	0	0	0
Nakamurella	0	0	0	0	0	0	0	0	0	0	0	0	0	0	0	0	0	0	0	0	0	0	0	0	0	0	0	0	0	0	0	0	0	0	0	0	0	0	0	0	0	0	0	0	0	0	0	0	0
CL50029marinegroup	0	0	0	0	0	0	0	0	0	0	0	0	0	0	0	0	0	0	0	0	0	0	0	0	0	0	0	0	0	0	0	0	0	0	0	0	0	0	0	0	0	0	0	0	0	0	0	0	0
Klebsiella	0	0	0	0	0	0	0	0	0	0	0	0	0	0	0	0	0	0	0	0	0	0	0	0	0	0	0	0	0	0	0	0	0	0	0	0	0	1.09101	0	0	0	0	0	0	0	0	0	0	0
Jatrophihabitans	0	0	0	0	0	0	0	0	0	0	0	0	0	0	0	0	0	0	0	0	0	0	0	0	0	0	0	0	0	0	0	0	1.42124	0	0	0	0	0	0	0	0	0	0	0	0	0	0	0	0
Dysgonomonas	0	0	0	0	0	0	0	0	0	0	0	0	0	0	0	0	0	0	0	0	0	0	0	0	0	0	0	0	0	0	0	0	0	0	0	0	0	0	0	0	0	0	0	0	0	0	0	0	0
WPS2	0	0	0	0	0	0	0	0	0	0	0	0	0	0	0	0	0	0	0	0	0	0	0	0	0	0	0	0	0	0	0	0	0	0	0	1.0994	0	0	0	0	0	0	0	0	0	0	0	0.155607	0
Azohydromonas	0	0	0	0	0	0	0	0	0	0	0	0	0	0	0	0	0	0	0	0	0	0	0	0	0	0	0	0	0	0	0	0	0	0	0	0	0	0	0	0	0	0	0	0	0	0	0	0	0
Ferribacterium	0	0	0	0	0	0	0	0	0	0	0	0	0	0	0	0	0	0	0	0	0	0	0	0	0	0	0	0	0	0	0	1.08591	0	3.8455	8.0441	0	0	0	0	0	0	0	0	0	0	0	0	0	0
Rudanella	0	0.314525	0	0	0	0	0	0	0	0	0	0	0	0	0	0	0	0	0	0	0	0	0	0	0	0	0	0	0	0	0	0	0	0	0	0	0	0	0	0	0	0	0	0	0	0	0	0	0
Sphaerotilus	0	0	0	0	0	0	0	0	0	0	0	0	0	0	0	0	0	0	0	0	0	0	0	0	0	0	0	0	0	0	0	0	0	0	0	0	0	0	0	0	0	0	0	0	0	0	0	0	0
R7C24	0	0	0	0	0	0	0	0	0	0	0	0	0	0	0	0	0	0	0	0	0	0	0	0	0	0	0	0	0	0	0	0	0	0	0	0	0	0	0	0	0	0	0	0	0	0	0	0	0
Jeotgalicoccus	0	0	0	0	0	0	0	0	0	0	0	0	0	0	0	0	0	0	0	0	0	0	0	0	0	0	0	0	0	0	0	0	0	0	0	0	0	0	0	0	0	0	0	0	0	0	0	0	0
Methylobacillus	0	0	0	0	0	0	0	0	0	0	0	0	0	0	0	0	0	0	0	0	0	0	0	0	0	0	0	0	0	0	0	0	0	0	0	0	0	0	0	0	0	0	0	0	0	0	0	0	0
Skermanella	0	0	0	0	0	0	0	0	0	0	0	0	0	0	0	0	0	0	0	0	0	0	0	0	0	0	0	0	0	0	0	0	0	0	0	0	0	0	0	0	0	0	0	0	0.731603	0	0	0	0
Tabrizicola	0	0	0	0	0	0	0	0	0	0	0	0	0	0	0	0	0	0	0	0	0	0	0	0	0	0	0	0	0	0	0	0.300308	0	0	0	0	0	0	0	0	0	0	0	1.23137	0.404587	0	0	0	0
Novispirillum	0	0	0	0	0	0	0	0	0	0	0	0	0	0	0	0	0	0	0	0	0	0	0	0	0	0	0	0	0	0	0	0	0	0	0	0	0	0	0	0	0	0	0	0	0	0	0	0	0
Vermiphilaceae	0	0	0	0	0	0	0	0	0	0	0	0	0	0	0	0	0	0	0	0	0	0	0	0	0	0	0	0	0	0	0	0	0	0	0	0	0	0	0	0	0	0	0	0	0	0	0	0	0
Ramlibacter	0	0	0	0	0	0	0	0	0	0	0	0	0	0	0	0	0	0	0	0	0	0	0	0	0	0	0	0	0	0	0	0	0	0	0	0	0	0	0	0	0	0	0	0	0	0	0	0	0
Tetragenococcus	0	0	0	0	0	0	0	0	0	0	0	0	0	0	0	0	0	0	0	0	0	0	0	0	0	0	0	0	0	0	0	0	0	0	0	0	0	0	0	0	0	0	0	0	0	0	0	0	0
Porphyromonas	0	0	0	0	0	0	0	0	0	0	0.403489	0	0	0	0	0	0	0	0	0	0	0	0	0	0	0	0	0	0	0	0	0	0	0	0	0	0	0	0	0	0	0	0	0	0	0	0	0	0
Curtobacterium	0	0	0	0	0	0	0	0	0	0	0	0	0	0	0	0	0	0	0	0	0	0	0	0	0	0	0	0	0	0	0	0	0	0	0	0	0	0	0	0	0	0	0	0	0	0	0	0	0
Fusibacter	0	0	0	0	0	0	0	0	0	0	0	0	0	0	0	0	0	0	0	0	0	0	0	0	0	0	0	0	0	0	0	0	0	0	0	0	0	0	0	0	0	0	0	0	0	0	0	0	0
Eubacteriumcoprostanoligenesgroup	0	0	0	0	0	0	0	0	0	0	0	0	0	0	0	0	0	0	0	0	0	0	0	0	0	0	0	0	0	0	0	0	0	0	0	0	0	0	0	0	0	0	0	0	0	0	0	0	0
Lautropia	0	0	0	1.56657	0	2.24549	0	2.45756	2.84846	2.26495	0	0	0	0	0	2.51363	2.1079	0	0	0	5.57588	6.42169	0	2.90797	0	5.77782	0	0	0	0	0	0	0	0	0	0	0	0	0	1.12888	0	0	0	0	0	0	0	0	0
Chitinibacter	0	0	0	0	0	0	0	0	0	0	0	0	0	0	0	0	0	0	0	0	0	0	0	0	0	0	0	0	0	0	0	0	0	0	0	0	0	0	0	0	0	0	0	0	0	0	0	0	0
Kapabacteriales	0.156398	0	0	0	0	0	0	0	0	0	0	0	0	0	0	0	0	0	0	0	0	0	0	0	0	0	0	0	0	0	0	0	0	0	0	0	0	0	0	0	0	0	0	0	0.760503	0	0	0	0
Acidibacter	0	0	0	0	0	0	0	0	0	0	0	0	0	0	0	0	0	0	0	0	0	0	0	0	0	0	0	0	0	0	0	0	0	0	0	0	0	0	0	0	0	0	0	0.896522	0	0.605904	0	0	2.61174
Gaiella	0	0	0	0	0	0	0	0	0	0	0	0	0	0	0	0	0	0	0	0	0	0	0	0	0	0	0	0	0	0	0	0	0	0	0	0	0	0	0	0	0	0	0	0	0	0	0	0	0
Anoxybacillus	0	0	0	0	0	0	0	0	0	0	0	0	0	0	0	0	0	0	0	0	0	0	0	0	0	0	0	0	0	0	0	0	0	0	0	0	0	0	0	0	0	0	0	0	0	0	0	0	0
OM27clade	0	0	0	0	0	0	0	0	0	0	0	0	0	0	0	0	0	0	0	0	0	0	0	0	0	0	0	0	0	0	0	0.264271	0	0	0	0	0	0	0	0	0	0	0	0	0	0	0	0	0
alphaIcluster	0	0	0	0	0	0	0	0	0	0	0	0	0	0	0	0	0	0	0	0	0	0	0	0	0	0	0	0	0	0	0	0	0	0	0	0	0	0	0	0	0	0	0	0	0	0	0.316076	0	0
Chthoniobacter	0	0	0	0	0	0	0	0	0	0	0	0	0	0	0	0	0	0	0	0	0	0	0	0	0	0	0	0	0	0	0	0	0	0	0	0	0	0	0	0	0	0	0	0	0	0	0	0	0
Planomicrobium	0	0	0	0	0	0	0	0	0	0	0	0	0	0	0	0	0	0	0	0	0	0	0	0	0	0	0	0	0	0	0	0	0	0	0	0	0	0	0	0	0	0	0	0	0	0	0	0	0
Alkalispirochaeta	0	0	0	0	0	0	0	0	0	0	0	0	0	0	0	0	0	0	0	0	0	0	0	0	0	0	0	0	0	0	0	0	0	0	0	0	0	0	0	0	0	0	0	0	0	0	0	0	0
JGI0001001H03	0	0	0	0	0	0	0	0	0	0	0	0	0	0	0	0	0	0	0	0	0	0	0	0	0	0	0	0	0	0	0	0	0	0	0	0	0	0	0	0	0	0	0	0	0	0	0	0	0
Thermicanus	0	0	0	0	0	0	0	0	0	0	0	0	0	0	0	0	0	0	0	0	0	0	0	0	0	0	0	0	0	0	0	0	0	0	0	0	0	0	0	0	0	0	0	0	0	0	0	0	0
CandidatusAccumulibacter	0	0	0	0	0	0	0	0	0	0	0	0	0	0	0	0	0	0	0	0	0	0	0	0	0	0	0	0	0	0	0	0	0	0	0	0	0	0	0	0	0	0	0	0	0	0	0	0	0
Desulfomicrobium	0	0	0	0	0	0	0	0	0	0	0	0	0	0	0	0	0	0	0	0	0	0	0	0	0	0	0	0	0	0	0	0	0	0	0	0	0	0	0	0	0	0	0	0	0	0	0	0	0
Methylocella	0	0	0	0	0	0	0	0	0	0	0	0	0	0	0	0	0	0	0	0	0	0	0	0	0	0	0	0	0	0	0	0	0	0	0	0	0	0	0	0	0	0	0	0	0	0	0	0	0
Sulfuricurvum	0	0	0	0	0	0	0	0	0	0	0	0	0	0	0	0	0	0	0	0	0	0	0	0	0	0	0	0	0	0	0	0	0	0	0	0	0	0	0	0	0	0	0	0	0	0	0	0	0
Amaricoccus	0	0	0	0	0	0	0	0	0	0	0	0	0	0	0	0	0	0	0	0	0	0	0	0	0	0	0	0	0	0	0	0	0	0	0	0	0	0	0	0	0	0	0	0	0	0	0	0	0
NK4A214group	0	0	0	0	0	0	0	0	0	0	0	0	0	0	0	0	0	0	0.234909	0	0	0	0	0	0	0	0	0	0	0	0	0	0	0	0	0	0	0	0	0	0	0	0	0	0	0	0	0	0
Rathayibacter	0	0	0	0	0	0	0	0	0	0	0	0	0	0	0	0	0	0	0	0	0	0	0	0	0	0	0	0	0	0	0	0	0	0	0	0	0	0	0	0	0	0	0	0	0	0	0	0	0
Sporosarcina	0	0	0	0	0	0	0	0	0	0	0	0	0	0	0	0	0	0	0	0	0	0	0	0	0	0	0	0	0	0	0	0	0	0	0	0	0	0	0	0	0	0	0	0	0	0	0	0	0
Rhizorhapis	1.81991	0	1.89458	1.59549	3.0849	0	1.6101	1.70367	2.1377	1.58599	0.778448	0.649864	2.16223	2.07187	0	2.90478	1.75254	3.50065	1.31363	0	0	0	0	0	0	0	0	0	0	0	0	0.934557	0	0	0	0	0	0	0	0	0	0	0	0	0	0	0	0	0
Pleomorphomonas	0	0	0	0	0	0	0	0	0	0	0	0	0	0	0	0	0	0	0	0	0	0	0	0	0	0	0	0	0	0	0	0	0	0	0	0	0	0	0	0	0	0	0	0	0	0	0	0	0
Bryocella	0	0	0	0	0	0	0	0	0	0	0	0	0	0	0	0	0	0	0	0	0	0	0	0	0	0	0	0	0	0	0	0	0	0	0	0	0	0	0	0	0	0	0	0	0	0	0	0	0
oc32	0	0	0	0	0	0	0	0	0	0	0	0	0	0	0	0	0	0	0	0	0	0	0	0	0	0	0	0	0	0	0	0	0	0	0	0	0	0	0	0	0	0	0	0	0	0	0	0	0
Advenella	0	0	0	0	0	0	0	0	0	0	0	0	0	0	0	0	0	0	0	0	0	0	0	0	0	0	0	0	0	0	0	0	0	0	0	0	0	0	0	0	0	0	0	0	0	0	0	0	0
Knoellia	0	0	0	0	0	0	0	0	0	0	0	0	0	0	0	0	0	0	0	0	0	0	0	0	0	0	0	0	0	0	0	0	0	0	0	0	0	0	0	0	0	0	0	0	0	0	0	0	0
Empedobacter	0	0	0	0	0	0	0	0	0	0	0	0	0	0	0	0	0	0	0	0	0	0	0	0	0	0	0	0	0	0	0	0	0	0	0	0	0	0	0	0	0	0	0	0	0	0	0	0	0
Azospira	0	0	0	0	0	0	0	0	0	0	0	0	0	0	0	0	0	0	0	0	0	0	0	0	0	0	0	0	0	0	0	0	0	0	0	0	0	0	0	0	0	0	0	0	0	0	0	0	0
PrevotellaceaeUCG001	0	0	0	0	0	0	0	0	0	0	0	0	0	0	0	0	0	0	0	0	0	0	0	0	0	0	0	0	0	0	0	0	0	0	0	0	0	0	0	0	0	0	0	0	0	0	0	0	0
OLB8	0	0	0	0	0	0	0	0	0	0	0	0	0	0	0	0	0	0	0	0	0	0	0	0	0	0	0	0	0	0	0	0	0	0	0	0	0	0	0	0	0	0	0	0	0	0	0	0	0
Janibacter	0	0	0	0	0	0	0	0	0	0	0	0	0	0	0	0	0	0	0	0	0	0	0	0	0	0	0	0	0	0	0	0	0	0	0	0	0	0	0	0	0	0	0	0	0	0	0	0	0
Nitrospira	0	0	0	0	0	0	0	0	0	0	0	0	0	0	0	0	0	0	0	0	0	0	0	0	0	0	0	0	0	0	0	0	0	0	0	0.318668	0	0	0	0	0	0	0	0	0	0	0	0	0
Solitalea	0	0	0	0	0	0	0	0	0	0	0	0	0	0	0	0	0	0	0	0	0	0	0	0	0	0	0	0	0	0	0	0	0	0	0	0	0	0	0	0	0	0	0	0	0	0	0	0	0
Agromyces	0	0	0	0	0	0	0	0	0	0	0	0	0	0	0	0	0	0	0	0	0	0	0	0	0	0	0	0	0	0	0	0.341149	0	0	0	0	0	0	0	0	0	0	0	0	0	0	0	0	0
Marmoricola	0	0	0	0	0	0	0	0	0	0	0	0	0	0	0	0	0	0	0	0	0	0	0	0	0	0	0	0	0	0	0	0	0	0	0	0	0	0	0	0	0	0	0	0	0	0	0	0	0
Geobacillus	0	0	0	0	0	0	0	0	0	0	0	0	0	0	0	0	0	0	0	0	0	0	0	0	0	0	0	0	0	0	0	0	0	0	0	0	0	0	0	0	0	0	0	0	0	0	0	0	0
Weissella	0	0	0	0	0	0	0	0	0	0	0	0	0	0	0	0	0	0	0	0	0	0	0	0	0	0	0	0	0	0	0	0	0	0	0	0	0	0	0	0	0	0	0	0	0	0	0.196185	0	0
Cytophaga	0.194313	4.0793	1.43315	0.0626627	2.46087	0.599256	2.54569	0.528315	0.33639	3.39484	0.3179	2.60824	0.453948	0.291356	0.447125	1.71209	0	2.21037	4.14799	1.43104	0.278396	0	0	0.63093	0.386211	0	0	0	0	0	0	0	0	0	0	0	0	0	0	0	0	0	0	0	0	0	0	0	0
Buchnera	0	0	0	0	0	0	0	0	0	0	0	0	0	0	0	0	0	0	0	0	0	0	0	0	0	0	0	0	0	0	0	0	0	0	0	0	0	0	0	0	0	0	0	0	0	0	0	0	0
Pandoraea	0	0	0	0	0	0	0	0	0	0	0	0	0	0	0	0	0	0	0	0	0	0	0	0	0	0	0	0	0	0	0	0	0	0	0	0	0	0	0	0	0	0	1.35075	0	0	0	0	0	0
Yersinia	0	0	0	0	0	0	0	0	0	0	0	0	0	0	0	0	0	0	0	0	0	0	0	0	0	0	0	0	0	0	0	0	0	0	0	0	0	0	0	0	0	0	0	0	0	0	0	0	0
Aliihoeflea	0	0	0	0	0	0	0	0	0	0	0	0	0	0	0	0	0	0	0	0	0	0	0	0	0	0	0	0	0	0	0	0	0	0	0	0	0	0	0	0	0	0	0	0	0	0	0	0	0
Luteibacter	0	0	0	0	0	0	0	0	0	0	0	0	0	0	0	0	0	0	0	0	0	0	0	0	0	0	0	0	0	0	0	0	0	0	0	0	0	0	0	0	0	0	0	0	0	0	0	0	0
Terriglobus	0	0	0	0	0	0	0	0	0	0	0	0	0	0	0	0	0	0	0	0	0	0	0	0	0	0	0	0	0	0	0	0	0	0	0	0	0	0	0	0	0	0	0	0	0	0	0	0	0
NS9marinegroup	0	0	0	0	0	0	0	0	0	0	0	0	0	0	0	0	0	0	0	0	0	0	0	0	0	0	0	0	0	0	0	0	0	0	0	0	0	0	0	0	0	0	0	0.332145	0	0	0	0	0
Limimaricola	0	0	0	0	0	0	0	0	0	0	0	0	0	0	0	0	0	0	0	0	0	0	0	0	0	0	0	0	0	0	0	0	0	0	0	0	0	0	0	0	0	0	0	0	0	0	0	0	0
CCD24	0	0	0	0	0	0	0	0	0	0	0	0	0	0	0	0	0	0	0	0	0	0	0	0	0	0	0	0	0	0	0	0	0	0	0	0	0	0	0	0	0	0	0	0	0	0	0	0	0
Giesbergeria	0	0	0	0	0	0	0	0	0	0	0	0	0	0	0	0	0	0	0	0	0	0	0	0	0	0	0	0	0	0	0	0	0	0	0	1.0775	0	0	0	0	0	0	0	0	0	0	0	0	0
OM60NOR5clade	0	0	0	0	0	0	0	0	0	0	0	0	0	0	0	0	0	0	0	0	0	0	0	0	0	0	0	0	0	0	0	0	0	0	0.12464	0	0	0	0	0	0	0	0	0	0	0	0.179837	0	0
Sulfurospirillum	0	0	0	0	0	0	0	0	0	0	0	0	0	0	0	0	0	0	0	0	0	0	0	0	0	0	0	0	0	0	0	0	0	0	0	0	0	0	0	0	0	0	0	0	0	0	0	0	0
Methylomonas	0	0	0	0	0	0	0	0	0	0	0	0	0	0	0	0	0	0	0	0	0	0	0	0	0	0	0	0	0	0	0	0	0	0	0	0	0	0	0	0	0	0	0	0	0	0	0	0	0
Pedomicrobium	0.587678	0	0.776288	0.501301	0.951135	0.633696	0.417755	1.09225	1.06343	0.492381	0	0	0	0.407899	0	0	0	0.577091	0	0	0.747693	0.813414	1.00394	0.768501	0.565012	0.805982	0	0	0	0	0	0	0	0	0	0	0	0	0	0	0	0	0	0	0	0	0	0	0
Ignatzschineria	0	0	0	0	0	0	0	0	0	0	0	0	0	0	0	0	0	0	0	0	0	0	0	0	0	0	0	0	0	0	0	0	0	0	0	0	0	0	0	0	0	0	0	0	0	0	0	0	0
Alistipes	0	0	0	0	0	0	0	0	0	0	0	0	0	0	0	0	0	0	0	0	0	0	0	0	0	0	0	0	0	0	0	0	0	0	0	0	0	0	0	0	0	0	0	0	0	0	0	0	0
Erysipelothrix	0	0	0	0	0	0	0	0	0	0	0	0	0	0	0	0	0	0	0	0	0	0	0	0	0	0	0	0	0	0	0	0	0	0	0	0.189209	0	0	0	0	0	0	0	0	0	0	0	0	0
A0839	0	0	0	0	0	0	0	0	0	0	0	0	0	0	0	0	0	0	0	0	0	0	0	0	0	0	0	0	0	0	0	0	0	0	0	0	0	0	0	0	0	0	0.118747	0	0	0	0	0	0
Sandarakinorhabdus	3.20853	5.70911	5.02144	3.36932	3.16542	4.51853	4.78677	6.26261	4.06381	6.9659	3.54173	4.63687	5.38765	2.55746	12.4259	5.1555	3.97351	4.74194	3.14654	3.40328	1.9965	3.41063	0	3.00285	1.0299	2.52476	0	4.44655	0	0	0	0	0	0	0	0	0	0	0	0	0	0	0	0	0	0	0	0	0
Campylobacter	0	0	0	0	0	0	0	0	0	0	0	0	0	0	0	0	0	0	0	0	0	0	0	0	0	0	0	0	0	0	0	0	0	0	0	0	0	0	0	0	0	0	0	0	0	0	0	0	0
Truepera	0	0	0	0	0	0	0	0	0	0	0	0	0	0	0	0	0	0	0	0	0	0	0	0	0	0	0	0	0	0	0	0	0	0	0	0	0	0	0	0	0	0	0	0	0	0	0	0	0
Collimonas	0	0	0	0	0	0	0	0	0	0	0	0	0	0	0	0	0	0	0	0	0	0	0	0	0	0	0	0	0	0	0	0	0	0	0	0	0	0	0	0	0	0	0	0	0	0	0	0	0
Panacagrimonas	0	0	0	0	0	0	0	0	0	0	0	0	0	0	0	0	0	0	0	0	0	0	0	0	0	0	0	0	0	0	0	0	0	0	0	0	0	0	0	0	0	0	0	0	0	0	0	0	0
LeptolyngbyaPCC6306	0	0	0	0	0	0	0	0	0	0	0	0	0	0	0	0	0	0	0	0	0	0	0	0	0	0	0	0	0	0	0	0	0	0	0	0	0	0	0	0	0	0	0	0	0	0	0	0	0
Aggregatibacter	0	0	0	0	0	0	0	0	0	0	0	0	0	0	0	0	0	0	0	0	0	0	0	0	0	0	0	0	0	0	0	0	0	0	0	0	0	0	0	0	0	0	0	0	0	0	0	0	0
SAR324cladeMarinegroupB	0	0	0	0	0	0	0	0	0	0	0	0	0	0	0	0	0	0	0	0	0	0	0	0	0	0	0	0	0	0	0	0.153757	0	0	0	0	0	0	0	0	0	0	0	0	0	0	0	0	0
Halomonas	0	0	0	0	0	0	0	0	0	0	0	0	0	0	0	0	0	0	0	0	0	0	0	0	0	0	0	0	0	0	0	0	0	0	0	0	0	0	0	0	0	0	0	0	0	0	0	0	0
SWB02	0	0	0	0	0	0	0	0	0	0	0	0	0	0	0	0	0	0	0	0	0	0	0	0	0	0	0	0	0	0	0	0	0	0	0	0	0	0	0	0	0	0	0	0	0	0	0	0	0
Morganella	0	0	0	0	0	0	0	0	0	0	0	0	0	0	0	0	0	0	0	0	0	0	0	0	0	0	0	0	0	0	0	0	0	0	0	0	0	0	0	0	0	0	0	0	0	0	0	0	0
Tardiphaga	0	0	0	0	0	0	0	0	0	0	0	0	0	0	0	0	0	0	0	0	0	0	0	0	0	0	0	0	0	0	0	0	0	0	0	0	0	0	0	0	0	0	0	0	0	0	0	0	0
Abiotrophia	0	0.252573	0	0	0	0	0	0	0	0	0	0	0	0	0	0	0	0	0	0	0	0	0	0	0	0	0	0	0	0	0	0	0	0	0	0	0	0	0	0	0	0	0	0	0	0	0	0	0
Geodermatophilus	0	0	0	0	0	0	0	0	0	0	0	0	0	0	0	0	0	0	0	0	0	0	0	0	0	0	0	0	0	0	0	0	0	0	0	0	0	0	0	0	0	0	0	0	0	0	0	0	0
Vulcaniibacterium	0	0	0	0	0	0	0	0	0	0	0	0	0	0	0	0	0	0	0	0	0	0	0	0	0	0	0	0	0	0	0	0	0	0	0	0	0	0	0	0	0	0	0	0	0	0	0	0	0
Polymorphobacter	0	0	0	0	0	0	0	0	0	0	0	0	0	0	0	0	0	0	0	0	0	0	0	0	0	0	0	0	0	0	0	0	0	0	0	0	0	0	0	0	0	0	0	0	0	0	0	0	1.45693
Promicromonospora	0	0	0	0	0	0	0	0	0	0	0	0	0	0	0	0	0	0	0	0	0	0	0	0	0	0	0	0	0	0	0	0	0	0	0	0	0	0	0	0	0	0	0	0	0	0	0	0	0
WCHB132	0	0	0	0	0	0	0	0	0	0	0	0	0	0	0	0	0	0	0	0	0	0	0	0	0	0	0	0	0	0	0	0	0	0	0	0	0	0	0	0	0	0	0	0	0	0	0	0	0
Roseisolibacter	0	0	0	0	0	0	0	0	0	0	0	0	0	0	0	0	0	0	0	0	0	0	0	0	0	0	0	0	0	0	0	0	0	0	0	0	0	0	0	0	0	0	0	0	0	0	0	0	0
Polycyclovorans	0	0	0	0	0	0	0	0	0	0	0	0	0	0	0	0	0	0	0	0	0	0	0	0	0	0	0	0	0	0	0	0	0	0	0	0	0	0	0	0	0	0	0	0	0	0	0	0	0
Cryobacterium	0	0	0	0	0	0	0	0	0	0	0	0	0	0	0	0	0	0	0	0	0	0	0	0	0	0	0	0	0	0	0	0	0	0	0	0	0	0	0	0	0	0	0	0	0	0	0	0	0
Chitinimonas	0	0	0	0	0	0	0	0	0	0	0	0	0	0	0	0	0	0	0	0	0	0	0	0	0	0	0	0	0	0	0	0	0	0	0	0	0	0	0	0	0	0	0	0	0	0	0	0	0
Planococcus	0	0	0	0	0	0	0	0	0	0	0	0	0	0	0	0	0	0	0	0	0	0	0	0	0	0	0	0	0	0	0	0	0	0	0	0	0	0	0	0	0	0	0	0	0	0	0	0	0
PrevotellaceaeNK3B31group	0	0	0	0	0	0	0	0	0	0	0	0	0	0	0	0	0	0	0	0	0	0	0	0	0	0	0	0	0	0	0	0	0	0	0	0	0	0	0	0	0	0	0	0	0	0	0	0	0
Lachnoclostridium	0	0	0	0	0	0	0	0	0	0	0	0.118556	0	0	0	0	0	0	0.0927271	0	0	0	0	0	0	0	0	0	0	0	0	0	0	0	0	0	0	0	0	0	0	0	0	0	0	0	0	0	0
KI89Aclade	0	0	0	0	0	0	0	0	0	0	0	0	0	0	0	0	0	0	0	0	0	0	0	0	0	0	0	0	0	0	0	0	1.11801	0	0	0	0	0	0	0	0	0	0	0	0.0532352	0	0	0	0
Nocardiopsis	0	0	0	0	0	0	0	0	0	0	0	0	0	0	0	0	0	0	0	0	0	0	0	0	0	0	0	0	0	0	0	0	0	0	0	0	0	0	0	0	0	0	0	0	0	0	0	0	0
Herbaspirillum	0	0	0	0	0	0	0	0	0	0	0	0	0	0	0	0	0	0	0	0	0	0	0	0	0	0	0	0	0	0	0	0	0	0	0	0	0	0	0	0	0	0	0	0	0	0	0	0	0
Desulfovibrio	0	0	0	0	0	0	0	0	0	0	0	0	0	0	0	0	0	0	0	0	0	0	0	0	0	0	0	0	0	0	0	0	0	0	0	0	0	0	0	0	0	0	0	0	0	0	0	0	0
Shewanella	0	0	0	0	0	0	0	0	0	0	0	0	0	0	0	0	0	0	0	0	0	0	0	0	0	0	0	0	0	0	0	0	0	0	0	0	0	0	0	0	0	0	0	0	0	3.34537	0	0	0
Longimicrobiaceae	0	0	0	0	0	0	0	0	0	0	0	0	0	0	0	0	0	0	0	0	0	0	0	0	0	0	0	0	0	0	0	0	0	0	0	0	0	0	0	0	0	0	0	0	0	0	0	0	0
Spirochaeta2	0	0	0	0	0	0	0	0	0	0	0	0	0	0	0	0	0	0	0	0	0	0	0	0	0	0	0	0	0	0	0	0	0	0	0	0	0	0	0	0	0	0	0	0	0	0	0	0	0
Faecalibacterium	0	0	0	0	0	0	0	0	0	0	0	0	0	0	0	0	0	0	0	0	0	0	0	0	0	0	0	0	0	0	0	0	0	0	0	0	0	0	0	0	0	0	0	0	0	0	0	0	0
SM1A07	0	0	0	0	0	0	0	0	0	0	0	0	0	0	0	0	0	0	0	0	0	0	0	0	0	0	0	0	0	0	0	0	0	0	0	0	0	0	0	0	0	0	0	0	0	0	0	0	0
ClostridiavadinBB60group	0	0	0	0	0	0	0	0	0	0	0	0	0	0	0	0	0	0	0	0	0	0	0	0	0	0	0	0	0	0	0	0	0	0	0	0	0	0	0	0	0	0	0	0	0	0	0	0	0
Microbulbifer	0	0	0	0	0	0	0	0	0	0	0	0	0	0	0	0	0	0	0	0	0	0	0	0	0	0	0	0	0	0	0	0	0	0	0	0	0	0	0	0	0	0	0	0	0	0	0	0	0
Peptostreptococcus	0	0	0	0	0	0	0	0	0	0	0	0	0	0	0	0	0	0	0	0	0	0	0	0	0	0	0	0	0	0	0	0	0	0	0	0	0	0	0	0	0	0	0	0	0	0	0	0	0
CandidatusRiegeria	0	0	0	0	0	0	0	0	0	0	0	0	0	0	0	0	0	0	0	0	0	0	0	0	0	0	0	0	0	0	0	0	0	0	0	0	0	0	0	0	0	0	0	0	0	0	0	0	0
Methylopila	0	0	0	0	0	0	0	0	0	0	0	0	0	0	0	0	0	0	0	0	0	0	0	0	0	0	0	0	0	0	0	0	0	0	0	0	0	0	0	0	0	0	0	0	0	0	0	0	0
BacteroidetesVC2.1Bac22	0	0	0	0	0	0	0	0	0	0	0	0	0	0	0	0	0	0	0	0	0	0	0	0	0	0	0	0	0	0	0	0	0	0	0	0	0	0	0	0	0	0	0	0	0	0	0	0	0
Luteolibacter	0	0	0	0	0	0	0	0	0	0	0	0	0	0	0	0	0	0	0	0	0	0	0	0	0	0	0	0	0	0	0	0	0	0	0	0	0	0	0	0	0	0	0	0	0	0	0	0	0.239998
Sporomusa	0	0	0	0.289212	0.442856	0.37884	0	0	0	0	0	0	0	0	0	0	0	0	0.253454	0	0	0	0	0	0	0	0	0	0	0	0	0	0	0	0	0	0	0	0	0	0	0	0	0	0	0	0	0	0
CandidatusSaccharimonas	0	0	0	0	0	0	0	0	0	0	0	0	0	0	0	0	0	0	0	0	0	0	0	0	0	0	0	0	0	0	0	0	0	0	0	0	0	0	0	0	0	0	0	0	0	0	0	0	0
Georgenia	0	0	0	0	0	0	0	0	0	0	0	0	0	0	0	0	0	0	0	0	0	0	0	0	0	0	0	0	0	0	0	0	0	0	0	0	0	0	0	0	0	0	0	0	0	0	0	0	0
Coxiella	0	0	0	0	0	0	0	0	0	0	0	0.45227	0	0	0	0	0	0	0.120545	0	0	0	0	0	0	0	0	0	0	0	0	0	0	0	0	0	0	0	0	0	0	0	0	0	0	0	0	0	0
ChristensenellaceaeR7group	0	0	0	0	0	0	0	0	0	0	0	0	0	0	0	0	0	0	0	0	0	0	0	0	0	0	0	0	0	0	0	0	0	0	0	0	0	0	0	0	0	0	0	0	0	0	0	0	0
Subgroup17	0	0	0	0	0	0	0	0	0	0	0	0	0	0	0	0	0	0	0	0	0	0	0	0	0	0	0	0	0	0	0	0	0	0	0	0	0	0	0	0	0	0	0	0	0	0	0	0	0
Myceligenerans	0	0	0	0	0	0	0	0	0	0	0	0	0	0	0	0	0	0	0	0	0	0	0	0	0	0	0	0	0	0	0	0	0	0	0	0	0	0	0	0	0	0	0	0	0	0	0	0	0
Thermomonas	0	0	0	0	0	0	0	0	0	0	0	0	0	0	0	0	0	0	0	0	0	0	0	0	0	0	0	0	0	0	0	0	0	0	0	0	0	0	0	0	0	0	0	0	0	0	0	0	0
CandidatusTremblaya	0	0	0	0	0	0	0	0	0	0	0	0	0	0	0	0	0	0	0	0	0	0	0	0	0	0	0	0	0	0	0	0	0	0	0	0	0	0	0	0	0	0	0	0	0	0	0	0	0
Crenothrix	0	0	0	0	0	0	0	0	0	0	0	0	0	0	0	0	0	0	0	0	0	0	0	0	0	0	0	0	0	0	0	0	0	0	0	0	0	0	0	0	0	0	0	0	0	0	0	0	0
Glutamicibacter	0	0	0	0	0	0	0	0	0	0	0	0	0	0	0	0	0	0	0	0	0	0	0	0	0	0	0	0	0	0	0	0	0	0	0	0	0	0	0	0	0	0	0	0	0	0	0	0	2.0781
Dongia	0	0	0	0	0	0	0	0	0	0	0	0	0	0	0	0	0	0	0	0	0	0	0	0	0	0	0	0	0	0	0	0	0	0	0	0	0	0	0	0	0	0	0	0	0	0	0	0	0
Ketogulonicigenium	0	0	0	0	0	0	0	0	0	0	0	0	0	0	0	0	0	0	0	0	0	0	0	0	0	0	0	0	0	0	0	0	0	0	0	0	0	0	0	0	0	0	0	0	0	0	0	0	0
Sphingoaurantiacus	0	0	0	0	0	0	0	0	0	0	0	0	0	0	0	0	0	0	0	0	0	0	0	0	0	0	0	0	0	0	0	0	0	0	0	0	0	0	0	0	0	0	0	0	0	0	0	0	0
Belnapia	0	0	0	0	0	0	0	0	0	0	0	0	0	0	0	0	0	0	0	0	0	0	0	0	0	0	0	0	0	0	0	0	0	0	0	0	0	0	0	0	0	0	0	0	0	0	0	0	0
Limibaculum	0	0	0	0	0	0	0	0	0	0	0	0	0	0	0	0	0	0	0	0	0	0	0	0	0	0	0	0	0	0	0	0	0	0	0	0	0	0	0	0	0	0	0	0	0	0	0	0	0
LachnospiraceaeNK4A136group	0	0	0	0	0	0	0	0	0	0	0	0	0	0	0	0	0	0	0	0	0	0	0	0	0	0	0	0	0	0	0	0	0	0	0	0	0	0	0	0	0	0	0	0	0	0	0	0	0
Fonticella	0	0	0	0	0.795129	0.323736	0.187119	0	0	0	0	0	0	0	0	0	0	0	0	0.312106	0	0	0	0	0	0	0	0.189566	0	0	0	0	0	0	0	0	0	0	0	0	0	0	0	0	0	0	0	0	0
Phaeodactylibacter	0	0	0	0	0	0	0	0	0	0	0	0	0	0	0	0	0	0	0	0	0	0	0	0	0	0	0	0	0	0	0	0	0	0	0	0	0	0	0	0	0	0	0	0	0	0	0	0	0
Akkermansia	0	0	0	0	0	0	0	0	0	0	0	0	0	0	0	0	0	0	0	0	0	0	0	0	0	0	0	0	0	0	0	0	0	0	0	0	0	0	0	0	0	0	0	0	0	0	0	0	0
Clostridiumsensustricto9	0	0	0	0	0	0	0	0	0	0	0	0	0	0	0	0	0	0	0	0	0	0	0	0	0	0	0	0	0	0	0	0	0	0	0	0	0	0	0	0	0	0	0	0	0	0	0	0	0
endosymbionts	0	0	0	0	0	0	0	0	0	0	0	0	0	0	0	0	0	0	0	0	0	0	0	0	0	0	0	0	0	0	0	0	0	0	0	0	0	0	0	0	0	0	0	0	0	0	0	0	0
Aridibacter	0	0	0	0	0	0	0	0	0	0	0	0	0	0	0	0	0	0	0	0	0	0	0	0	0	0	0	0	0	0	0	0	0	0	0	0	0	0	0	0	0	0	0	0	0	0	0	0	0
AKIW781	0	0	0	0	0	0	0	0	0	0	0	0	0	0	0	0	0	0	0	0	0	0	0	0	0	0	0	0	0	0	0	0	0	0	0	0	0	0	0	0	0	0	0	0	0	0	0	0	0
DSSD61	0.436019	0	0.57543	0	0.61396	0.385728	0	0	0.406923	0	0	0	0.161271	0	0	0	0.419964	0	0	0	0	0	0	0	0	0	0	0	0	0	0	0	0	0	0	0	0	0	0	0	0	0	0	0	0	0	0	0	0
UCG005	0	0	0	0	0	0	0	0	0	0	0	0	0	0	0	0	0	0	0	0	0	0	0	0	0	0	0	0	0	0	0	0	0	0	0	0	0	0	0	0	0	0	0	0	0	0	0	0	0
Flavisolibacter	0	0	0	0	0	0	0	0	0	0	0	0	0	0	0	0	0	0	0	0	0	0	0	0	0	0	0	0	0	0	0	0	0	0	0	0	0	0	0	0	0	0	0	0	0	0	0	0	0
Erythrobacter	0	0	0	0	0	0	0	0	0	0	0	0	0	0	0	0	0	0	0	0	0	0	0	0	0	0	0	0	0	0	0	0	0	0	0	0	0	0	0	0	0	0	0	0	0	0	0	0	0
Ruminiclostridium	0	0	0	0	0.296915	0	0	0	0	0	0	0.434706	0	0	0	0	0	0	0	0	0	0	0	0	0	0	0	0	0	0	0	0	0	0	0	0	0	0	0	0	0	0	0	0.261936	0	0	0	0	0
Uliginosibacterium	0	0	0	0	0	0	0	0	0	0	0	0	0	0	0	0	0	0	0	0	0	0	0	0	0	0	0	0	0	0	0	0	0	0	0	0	0	0	0	0	0	0	0	0	0	0	0	0	0
Bartonella	0	0	0	0	0	0	0	0	0	0	0	0	0	0	0	0	0	0	0	0	0	0	0	0	0	0	0	0	0	0	0	0	0	0	0	0	0	0	0	0	0	0	0	0	0	0	0	0	0
Fontimonas	0	0	0	0	0	0	0	0	0	0	0	0	0	0	0	0	0	0	0	0	0	0	0	0	0	0	0	0	0	0	0	0	0	0	0	0	0	0	0	0	0	0	0	0	0	0	0	0	0
Saccharibacillus	0	0	0	0	0	0	0	0	0	0	0	0	0	0	0	0	0	0	0	0	0	0	0	0	0	0	0	0	0	0	0	0	0	0	0	0	0	0	0	0	0	0	0	0	0	0	0	0	0
CandidatusParacaedibacter	0	0	0	0	0	0	0	0	0	0	0	0	0	0	0	0	0	0	0	0	0	0	0	0	0	0	0	0	0	0	0	0	0	0	0	0	0	0	0	0	0	0	0	0	0	0	0	0	0
Caenarcaniphilales	0	0	0	0	0	0	0	0	0	0	0	0	0	0	0	0	0	0	0	0	0	0	0	0	0	0	0	0	0	0	0	0	0	0	0	0	0	0	0	0	0	0	0	0	0	0	0	0	0
Facklamia	0	0	0	0	0	0	0	0	0	0	0	0	0	0	0	0	0	0	0	0	0	0	0	0	0	0	0	0	0	0	0	0	0	0	0	0	0	0	0	0	0	0	0	0	0	0	0	0	0
IMCC26256	0	0	0	0	0	0	0	0	0	0	0	0	0	0	0	0	0	0	0	0	0	0	0	0	0	0	0	0	0	0	0	0.276283	0	0	0	1.39616	0	0	0	0	0	0	0	0.677792	0	0	0	0	0
Solimonas	0	0	0	0	0	0	0	0	0	0	0	0	0	0	0	0	0	0	0	0	0	0	0	0	0	0	0	0	0	0	0	0	0	0	0	0	0	0	0	0	0	0	0	0	0	0	0	0	0
Ruegeria	0	0	0	0	0	0	0	0	0	0	0	0	0	0	0	0	0	0	0	0	0	0	0	0	0	0	0	0	0	0	0	0	0	0	0	0	0	0	0	0	0	0	0	0	0	0	0	0	0
Cetobacterium	0	0	0	0	0	0	0	0	0	0	0	0	0	0	0	0	0	0	0	0	0	0	0	0	0	0	0	0	0	0	0	0	0	0	0	0	0	0	0	0	0	0	0	0	0	0	0	0	0
Paludibaculum	0.71564	0	1.27029	0	0.372402	0.888552	0.130548	0.700463	0.520862	1.25428	0	0	0.197109	1.37909	0	0.545046	0.94492	1.17051	0	0	0	0.249732	0	0	0	0	0	0	0	0	0	0	0	0	0	0	0	0	0	0	0	0	0	0	0	0	0	0	0
Anaerovorax	0	0	0	0	0	0	0	0	0	0	0	0.232722	0	0	0	0	0	0	0	0	0	0	0	0	0	0	0	0	0	0	0	0	0	0	0	0	0	0	0	0	0	0	0	0	0	0	0	0	0
Haliscomenobacter	0	0	0	0	0	0	0	0	0	0	0	0	0	0	0	0	0	0	0	0	0	0	0	0	0	0	0	0	0	0	0	0	0	0	0	0	0	0	0	0	0	0	0	0	0	0	0	0	0
Colidextribacter	0	0	0	0	0	0	0	0	0	0	0	0	0	0	0	0	0	0	0	0	0	0	0	0	0	0	0	0	0	0	0	0	0	0	0	0	0	0	0	0	0	0	0	0	0	0	0	0	0
CraurococcusCaldovatus	0	0	0	0	0	0	0	0	0	0	0	0	0	0	0	0	0	0	0	0	0	0	0	0	0	0	0	0	0	0	0	0	0	0	0	0	0	0	0	0	0	0	0	0	0	0	0	0	0
Myroides	0	0	0	0	0	0	0	0	0	0	0	0	0	0	0	0	0	0	0	0	0	0	0	0	0	0	0	0	0	0	0	0	0	0	0	0	0	0	0	0	0	0	0	0	0	0	0	0	0
Algoriphagus	0	0	0	0	0	0	0	0	0	0	0	0	0	0	0	0	0	0	0	0	0	0	0	0	0	0	0	0	0	0	0	0	0	0	0	0	0	0	0	0	0	0	0	0	0	0	0	0	0
Capnocytophaga	0	0	0	0	0	0	0	0	0	0	0	0	0	0	0	0	0	0	0	0	0	0	0	0	0	0	0	0	0	0	0	0	0	0	0	0	0	0	0	0	0	0	0	0	0	0	0	0	0
Intestinibacter	0	0	0	0	0	0	0	0	0	0	0	0	0	0	0	0	0	0	0	0	0	0	0	0	0	0	0	0	0	0	0	0	0	0	0	0	0	0	0	0	0	0	0	0	0	0	0	0	0
CandidatusObscuribacter	0	0	0	0	0	0	0	0	0	0	0	0	0	0	0	0	0	0	0	0	0	0	0	0	0	0	0	0	0	0	0	0	0	0	0	0	0	0	0	0	0	0	0	0	0	0	0	0	0
Adhaeribacter	0	0	0	0	0	0	0	0	0	0	0	0	0	0	0	0	0	0	0	0	0	0	0	0	0	0	0	0	0	0	0	0	0	0	0	0	0	0	0	0	0	0	0	0	0	0	0	0	0
Iodobacter	0	0	0	0	0	0	0	0	0	0	0	0	0	0	0	0	0	0	0	0	0	0	0	0	0	0	0	0	0	0	0	0	0	0	0	0	0	0	0	0	0	0	0	0	0	0	0	0	0
Caedibacter	0	0	0	0	0	0	0	0	0	0	0	0	0	0	0	0	0	0	0	0	0	0	0	0	0	0	0	0	0.493256	0	0	0	0	0	0	0	0	0	0	0	0	0	0	0	0	0	0	0	0
Noviherbaspirillum	0	0	0	0	0	0	0	0	0	0	0	0	0	0	0	0	0	0	0	0	0	0	0	0	0	0	0	0	0	0	0	0	0	0	0	0	0	0	0	0	0	0	0	0	0	0	0	0	0
Paenisporosarcina	0	0	0	0	0	0	0	0	0	0	0	0	0	0	0	0	0	0	0	0	0	0	0	0	0	0	0	0	0	0	0	0	0	0	0	0	0	0	0	0	0	0	0	0	0	0	0	0	0
Saccharopolyspora	0	0	0	0	0	0	0	0	0	0	0	0	0	0	0	0	0	0	0	0	0	0	0	0	0	0	0	0	0	0	0	0	0	0	0	0	0	0	0	0	0	0	0	0	0	0	0	0	0
Luteitalea	0	0	0	0	0	0	0	0	0	0	0	0	0	0	0	0	0	0	0	0	0	0	0	0	0	0	0	0	0	0	0	0	0	0	0	0	0	0	0	0	0	0	0	0	0	0	0	0	0
Cnuella	0.374408	0	0	0	0	0	0	0	0	0	0	0.13612	0	0	0	0	0	0	0.472908	2.965	0	0.406707	0.243948	0.763757	0	0.281608	0	4.38061	0	0	0	0	0	0	0	0	0	0	0	0	0	0	0	0	0	0	0	0	0
Ruminococcus	0	0	0	0	0	0	0	0	0	0	0	0	0	0	0	0	0	0	0	0	0	0	0	0	0	0	0	0	0	0	0	0	0	0	0	0	0	0	0	0	0	0.151712	0	0	0	0	0	0	0
Thermoactinomyces	0	0	0	0	0	0	0	0	0	0	0	0	0	0	0	0	0	0	0	0	0	0	0	0	0	0	0	0	0	0	0	0	0.532034	0	0	0	0	0	0	0	0	0	0	0	0	0	0	0	0
Paenarthrobacter	0	0	0	0	0	0	0	0	0	0	0	0	0	0	0	0	0	0	0	0	0	0	0	0.441176	0	0	0	0	0	0	0	0.345954	0	0	0	0	0	0	0	0	0	0	0	0	0	0	0	0	0.643759
AKYH767	0	0	0	0	0	0	0	0	0	0	0	0	0	0	0	0	0	0	0	0	0	0	0	0	0	0	0	0	0	0	0	0	0	0	0	0	0	0	0	0	0	0	0	0	0	0	0	0	0
Ezakiella	0	0	0	0	0	0	0	0	0	0	0	0	0	0	0	0	0	0	0	0	0	0	0	0	0	0	0	0	0	0	0	0	0	0	0	0	0	0	0	0	0	0	0	0	0	0	0	0	0
SUP05cluster	0	0	0	0	0	0	0	0	0	0	0	0	0	0	0	0	0	0	0	0	0	0	0	0	0	0	0	0	0	0	0	0	0	0	0	0	0	0.581871	0	0	0	0	0	0	0	0	0	0	0
bacteriap25	0	0	0	0	0	0	0	0	0	0	0	0	0	0	0	0	0	0	0	0	0	0	0	0	0	0	0	0	0	0	0	0	0	0	0	0	0	0	0	0	0	0	0	0	0	0	0	0	0
Sarcina	0	0	0	0	0	0	0	0	0	0	0	0	0	0	0	0	0	0	0	0	0	0	0	0	0	0	0	0	0	0	0	0	0	0	0	0	0	0	0	0	0	0	0	0	0	0	0	0	0
FamilyXIIIAD3011group	0	0	0	0	0	0	0	0	0	0	0	0	0	0	0	0	0	0	0	0	0	0	0	0	0	0	0	0	0	0	0	0	0	0	0	0	0	0	0	0	0	0	0	0	0	0	0	0	0
Terrisporobacter	0	0	0	0	0	0	0	0	0	0	0	0	0	0	0	0	0	0	0	0	0	0	0	0	0	0	0	0	0	0	0	0	0	0	0	0	0	0	0	0	0	0	0	0	0	0	0	0	0
PB19	0	0	0	0	0	0	0	0	0	0	0	0	0	0	0	0	0	0	0	0	0	0	0	0	0	0	0	0	0	0	0	0	0	0	0	0	0	0	0	0	0	0	0	0	0	0	0	0	0
Acidocella	0	0	0	0	0	0	0	0	0	0	0	0	0	0	0	0	0	0	0	0	0	0	0	0	0	0	0	0	0	0	0	0	0	0	0	0	0	0	0	0	0	0	0	0	0	0	0	0	0
Ottowia	0	0	0	0	0	0	0	0	0	0	0	0	0	0	0	0	0	0	0	0	0	0	0	0	0	0	0	0	0	0	0	0	0	0	0	0	0	0	0	0	0	0	0	0	0	0	0	0	0
Herminiimonas	0	0	0	0	0	0	0	0	0	0	0	0	0	0	0	0	0	0	0	0	0	0	0	0	0	0	0	0	0	0	0	0	0	0	0	0	0	0	0	0	0	0	0	0	0	0	0	0	0
CPR2	0	0	0	0	0	0	0	0	0	0	0	0	0	0	0	0	0	0	0	0	0	0	0	0	0	0	0	0	0	0	0	0	0	0	0	0	0	0	0	0	0	0	0	0	0	0	0	0	0
Fibrobacter	0	0	0	0	0	0	0	0	0	0	0	0	0	0	0	0	0	0	0	0	0	0	0	0	0	0	0	0	0	0	0	0	0	0	0	0	0	0	0	0	0	0	0	0	0	0	0	0	0
Klenkia	0	0	0	0	0	0	0	0	0	0	0	0	0	0	0	0	0	0	0	0	0	0	0	0	0	0	0	0	0	0	0	0	0	0	0	0	0	0	0	0	0	0	0	0	0	0	0	0	0
Chitinophaga	0	0	0	0	0	0	0	0	0	0	0	0	0	0	0	0	0	0	0	0	0	0	0	0	0	0	0	0	0	0	0	0	0	0	0	0	0	0	0	0	0	0	0	0	0	0	0	0	0
Ellin6055	0	0	0	0	0	0	0	0	0	0	0	0	0	0	0	0	0	0	0	0	0	0	0	0	0	0	0	0	0	0	0	0	0	0	0	0	0	0	0	0	0	0	0	0	0	0	0	0	0
Leptotrichia	0	0	0	0	0	0	0	0	0	0	0	0	0	0	0	0	0	0	0	0	0	0	0	0	0	0	0	0	0	0	0	0	0	0	0	0	0	0	0	0	0	0	0	0	0	0	0	0	0
Eubacteriumsiraeumgroup	0	0	0	0	0	0	0	0	0	0	0	0	0	0	0	0	0	0	0	0	0	0	0	0	0	0	0	0	0	0	0	0	0	0	0	0	0	0	0	0	0	0	0	0	0	0	0	0	0
Sutterella	0	0	0	0	0	0	0	0	0	0	0	0	0	0	0	0	0	0	0	0	0	0	0	0	0	0	0	0	0	0	0	0	0	0	0	0	0	0	0	0	0	0	0	0	0	0	0	0	0
D052	0	0	0	0	0	0	0	0	0	0	0	0	0	0	0	0	0	0	0	0	0	0	0	0	0	0	0	0	0	0	0	0	0	0	0	0	0	0	0	0	0	0	0	0	0	0	0	0	0
Hydrogenispora	0	0	0	0	0	0	0	0	0	0	0	0	0	0	0	0	0	0	0	0	0	0	0	0	0	0	0	0	0	0	0	0	0	0	0	0	0	0	0	0	0	0	0	0	0	0	0	0	0
Trichlorobacter	0	0	0	0	0	0	0	0	0	0	0	0	0	0	0	0	0	0	0	0	0	0	0	0	0	0	0	0	0	0	0	0	0	0	0	0	0	0	0	0	0	0	0	0	0	0	0	0	0
Roseicyclus	0	0	0	0	0	0	0	0	0	0	0	0	0	0	0	0	0	0	0	0	0	0	0	0	0	0	0	0	0	0	0	0	0	0	0	0	0	0	0	0	0	0	0	0	0	0	0	0	0
Kazania	0	0	0	0	0	0	0	0	0	0	0	0	0	0	0	0	0	0	0	0	0	0	0	0	0	0	0	0	0	0	0	0	0	0	0	0	0	0	0	0	0	0	0	0	0	0	0	0	0
Olsenella	0	0	0	0	0	0	0	0	0	0	0	0	0	0	0	0	0	0	0	0	0	0	0	0	0	0	0	0	0	0	0	0	0	0	0	0	0	0	0	0	0	0	0	0	0	0	0	0	0
TychonemaCCAP145911B	0	0	0	0	0	0	0	0	0	0	0	0	0	0	0	0	0	0	0	0	0	0	0	0	0	0	0	0	0	0	0	0	0	0	0	0	0	0	0	0	0	0	0	0	0	0	0	0	0
Cupriavidus	0	0	0	0	0	0	0	0	0	0	0	0	0	0	0	0	0	0	0	0	0	0	0	0	0	0	0	0	0	0	0	0	0	0	0	0	0	0	0	0	0	0	0	0	0	0	0	0	0
Vagococcus	0	0	0	0	0	0	0	0	0	0	0	0	0	0	0	0	0	0	0	0	0	0	0	0	0	0	0	0	0	0	0	0	0	0	0	0	0	0	0	0	0	0	0	0	0	0	0	0	0
Clostridiumsensustricto8	0	0	0	0	0	0	0	0	0	0	0	0	0	0	0	0	0	0	0	0	0	0	0	0	0	0	0	0	0	0	0	0	0	0	0	0	0	0	0	0	0	0	0	0	0	0	0	0	0
Labrys	0	0	0	0	0	0	0	0	0	0	0	0	0	0	0	0	0	0	0	0	0	0	0	0	0	0	0	0	0	0	0	0	0	0	0	0	0	0	0	0	0	0	0	0	0	0	0	0	0
Vibrio	0	0	0	0	0	0	0	0	0	0	0	0	0	0	0	0	0	0	0	0	0	0	0	0	0	0	0	0	0	0	0	0	0	0	0	0	0	0	0	0	0	0	0	0	0	0	0	0	0
Sporichthya	0	0	0	0	0	0	0	0	0	0	0	0	0	0	0	0	0	0	0	0	0	0	0	0	0	0	0	0	0	0	0	0	0	0	0	0	0	0	0	0	0	0	0	0	0	0	0	0	0
Anaerospora	0	0	0	0	0	0	0	0	0	0	0	0	0	0	0	0	0	0	0	0	0	0	0	0	0	0	0	0	0	0	0	0	0	0	0	0	0	0	0	0	0	0	0	0	0	0	0	0	0
Phycicoccus	0	0	0	0	0	0	0	0	0	0	0	0	0	0	0	0	0	0	0	0	0	0	0	0	0	0	0	0	0	0	0	0	0	0	0	0	0	0	0	0	0	0	0	0	0	0	0	0	0
EscherichiaShigella	0	0	0	0	0	0	0	0	0	0	0	0	0	0	0	0	0	0	0	0	0	0	0	0	0	0	0	0	0	0	0	0	0	0	0	0	0	0	0	0	0	0	0	0	0	0	0	0	0
Rubrobacter	0	0	0	0	0	0	0	0	0	0	0	0	0	0	0	0	0	0	0	0	0	0	0	0	0	0	0	0	0	0	0	0	0	0	0	0	0	0	0	0	0	0	0	0	0	0	0	0	0
Carnobacterium	0	0	0	0	0	0	0	0	0	0	0	0	0	0	0	0	0	0	0	0	0	0	0	0	0	0	0	0	0	0	0	0	0	0	0	0	0	0	0	0	0	0	0	0	0	0	0	0	0
Armatimonadales	0	0	0	0	0	0	0	0	0	0	0	0	0	0	0	0	0	0	0	0	0	0	0	0	0	0	0	0	0	0	0	0	0	0	0	0	0	0	0	0	0	0	0	0	0	0	0	0	0
Falsirhodobacter	0	0	0	0	0	0	0	0	0	0	0	0	0	0	0	0	0	0	0	0	0	0	0	0	0	0	0	0	0	0	0	0	0	0	0	0	0	0	0	0	0	0	0	0	0	0	0	0	0
MBA2108	0	0	0	0	0	0	0	0	0	0	0	0	0	0	0	0	0	0	0	0	0	0	0	0	0	0	0	0	0	0	0	0	0	0	0	0	0	0	0	0	0	0	0	0	0	0	0	0	0
DTU014	0	0	0	0	0	0	0	0	0	0	0	0	0	0	0	0	0	0	0	0	0	0	0	0	0	0	0	0	0	0	0	0	0	0	0	0	0	0	0	0	0	0	0	0	0	0	0	0	0
Propionivibrio	0	0	0	0	0	0	0	0	0	0	0	0	0	0	0	0	0	0	0	0	0	0	0	0	0	0	0	0	0	0	0	0	0	0	0	0	0	0	0	0	0	0	0	0	0	0	0	0	0
Ureibacillus	0	0	0	0	0	0	0	0	0	0	0	0	0	0	0	0	0	0	0	0	0	0	0	0	0	0	0	0	0	0	0	0	0	0	0	0	0	0	0	0	0	0	0	0	0	0	0	0	0
Pseudarthrobacter	0	0	0	0	0	0	0	0	0	0	0	0	0	0	0	0	0	0	0	0	0	0	0	0	0	0	0	0	0	0	0	0	0	0	0	0	0	0	0	0	0	0	0	0	0	0	0	0	0
CandidatusOvatusbacter	0	0	0	0	0	0	0	0	0	0	0	0	0	0	0	0	0	0	0	0	0	0	0	0	0	0	0	0	0	0	0	0	0	0	0	0	0	0	0	0	0	0	0	0	0	0	0	0	0
Armatimonas	0	0	0	0	0	0	0	0	0	0	0	0	0	0	0	0	0	0	0	0	0	0	0	0	0	0	0	0	0	0	0	0	0	0	0	0	0	0	0	0	0	0	0	0	0	0	0	0	0
IncertaeSedis	0	0	0	0	0	0	0	0	0	0	0	0	0	0	0	0	0	0	0	0	0	0	0	0	0	0	0	0	0	0	0	0	0	0	0	0	0	0	0	0	0	0	0	0	0	0	0	0	0
Tumebacillus	0	0	0	0	0	0	0	0	0	0	0	0	0	0	0	0	0	0	0	0	0	0	0	0	0	0	0	0	0	0	0	0	0	0	0	0	0	0	0	0	0	0	0	0	0	0	0	0	0
Alloiococcus	0	0	0	0	0	0	0	0	0	0	0	0	0	0	0	0	0	0	0	0	0	0	0	0	0	0	0	0	0	0	0	0	0	0	0	0	0	0	0	0	0	0	0	0	0	0	0	0	0
Thermus	0	0	0	0	0	0	0	0	0	0	0	0	0	0	0	0	0	0	0	0	0	0	0	0	0	0	0	0	0	0	0	0	0	0	0	0	0	0	0	0	0	0	0	0	0	0	0	0	0
Eubacteriumnodatumgroup	0	0	0	0	0	0	0	0	0	0	0	0	0	0	0	0	0	0	0	0	0	0	0	0	0	0	0	0	0	0	0	0	0	0	0	0	0	0	0	0	0	0	0	0	0	0	0	0	0
Atopostipes	0	0	0	0	0	0	0	0	0	0	0	0	0	0	0	0	0	0	0	0	0	0	0	0	0	0	0	0	0	0	0	0	0	0	0	0	0	0	0	0	0	0	0	0	0	0	0	0	0
Pigmentiphaga	0	0	0	0	0	0	0	0	0	0	0	0	0	0	0	0	0	0	0	0	0	0	0	0	0	0	0	0	0	0	0	0	0	0	0	0	0	0	0	0	0	0	0	0	0	0	0	0	0
Negativicoccus	0	0	0	0	0	0	0	0	0	0	0	0	0	0	0	0	0	0	0	0	0	0	0	0	0	0	0	0	0	0	0	0	0	0	0	0	0	0	0	0	0	0	0	0	0	0	0	0	0
Geobacter	0	0	0	0	0	0	0	0	0	0	0	0	0	0	0	0	0	0	0	0	0	0	0	0	0	0	0	0	0	0	0	0	0	0	0	0	0	0	0	0	0	0	0	0	0	0	0	0	0
Herbiconiux	0	0	0	0	0	0	0	0	0	0	0	0	0	0	0	0	0	0	0	0	0	0	0	0	0	0	0	0	0	0	0	0	0	0	0	0	0	0	0	0	0	0	0	0	0	0	0	0	0
Dietzia	0	0	0	0	0	0	0	0	0	0	0	0	0	0	0	0	0	0	0	0	0	0	0	0	0	0	0	0	0	0	0	0	0	0	0	0	0	0	0	0	0	0	0	0	0	0	0	0	0
Rahnella1	0	0	0	0	0	0	0	0	0	0	0	0	0	0	0	0	0	0	0	0	0	0	0	0	0	0	0	0	0	0	0	0	0	0	0	0	0	0	0	0	0	0	0	0	0	0	0	0	0
Mogibacterium	0	0	0	0	0	0	0	0	0	0	0	0	0	0	0	0	0	0	0	0	0	0	0	0	0	0	0	0	0	0	0	0	0	0	0	0	0	0	0	0	0	0	0	0	0	0	0	0	0
Arcobacter	0	0	0	0	0	0	0	0	0	0	0	0	0	0	0	0	0	0	0	0	0	0	0	0	0	0	0	0	0	0	0	0	0	0	0	0	0	0	0	0	0	0	0	0	0	0	0	0	0
Actinoplanes	0	0	0	0	0	0	0	0	0	0	0	0	0	0	0	0	0	0	0	0	0	0	0	0	0	0	0	0	0.308285	0	0	0	2.52251	0	0	0	0	0	0	0	0	0	0	0	0	0	0	0	0
Thauera	0	0	0	0	0	0	0	0	0	0	0	0	0	0	0	0	0	0	0	0	0	0	0	0	0	0	0	0	0	0	0	0	0	0	0	0	0	0	0	0	0	0	0	0	0	0	0	0	0
C0119	0	0	0	0	0	0	0	0	0	0	0	0	0	0	0	0	0	0	0	0	0	0	0	0	0	0	0	0	0	0	0	0	0	0	0	0	0	0	0	0	0	0	0	0	0	0	0	0	0
Dermabacter	0	0	0	0	0	0	0	0	0	0	0	0	0	0	0	0	0	0	0	0	0	0	0	0	0	0	0	0	0	0	0	0	0	0	0	0	0	0	0	0	0	0	0	0	0	0	0	0	0
Mucispirillum	0	0	0	0	0	0	0	0	0	0	0	0	0	0	0	0	0	0	0	0	0	0	0	0	0	0	0	0	0	0	0	0	0	0	0	0	0	0	0	0	0	0	0	0	0	0	0	0	0
Desulfobulbus	0	0	0	0	0	0	0	0	0	0	0	0	0	0	0	0	0	0	0	0	0	0	0	0	0	0	0	0	0	0	0	0	0	0	0	0	0	0	0	0	0	0	0	0	0	0	0	0	0
Deefgea	0	0	0	0	0	0	0	0	0	0	0	0	0	0	0	0	0	0	0	0	0	0	0	0	0	0	0	0	0	0.255283	0	0	0	0	0	0	0	0.554596	0	0	0	0	0	0	0	0	0	0	0
Subgroup10	0	0	0	0	0	0	0	0	0	0	0	0	0	0	0	0	0	0	0	0	0	0	0	0	0	0	0	0	0	0	0	0	0	0	0	0	0	0	0	0	0	0	0	0.184975	0	0	0	0	0
Acidaminobacter	0	0	0	0	0	0	0	0	0	0	0	0	0	0	0	0	0	0	0	0	0	0	0	0	0	0	0	0	0	0	0	0	0	0	0	0.362485	0	0	0	0	0	0	0	0	0	0	0	0	0
Bergeyella	0	0	0	0	0	0	0	0	0	0	0	0	0	0	0	0	0	0	0	0	0	0	0	0	0	0	0	0	0	0	0	0	0	0	0	0	0	0	0	0	0	0	0	0	0	0	0	0	0
Demequina	0	0	0	0	0	0	0	0	0	0	0	0	0	0	0	0	0	0	0	0	0	0	0	0	0	0	0	0	0	0	0	0	0	0	0	0	0	0	0	0	0	0	0	0	0	0	0	0	0
AAP99	0	0	0	0	0	0	0	0	0	0	0	0	0	0	0	0	0	0	0	0	0	0	0	0	0	0	0	0	0	0	0	0	0	0	0	0	0	0	0	0	0	0	0	0	0	0	0	0	0
Fictibacillus	0	0	0	0	0	0	0	0	0	0	0	0	0	0	0	0	0	0	0	0	0	0	0	0	0	0	0	0	0	0	0	0	0	0	0	0	0	0	0	0	0	0	0	0	0	0	0	0	0
Oscillibacter	0	0	0	0	0	0	0	0	0	0	0	0	0	0	0	0	0	0	0	0	0	0	0	0	0	0	0	0	0	0	0	0	0	0	0	0	0	0	0	0	0	0	0	0	0	0	0	0	0
ZOR0006	0	0	0	0	0	0	0	0	0	0	0	0	0	0	0	0	0	0	0	0	0	0	0	0	0	0	0	0	0	0	0	0	0	0	0	0	0	0	0	0	0	0	0	0	0	0	0	0	0
Lamprocystis	0	0	0	0	0	0	0	0	0	0	0	0	0	0	0	0	0	0	0	0	0	0	0	0	0	0	0	0	0	0	0	0	0	0	0	0	0	0	0	0	0	0	0	0	0	0	0	0	0
Edaphobacter	0	0	0	0	0	0	0	0	0	0	0	0	0	0	0	0	0	0	0	0	0	0	0	0	0	0	0	0	0	0	0	0	0	0	0	0	0	0	0	0	0	0	0	0	0	0	0	0	0
LD29	0	0	0	0	0	0	0	0	0	0	0	0	0	0	0	0	0	0	0	0	0	0	0	0	0	0	0	0	0	0	0	0	0	0	0	0	0	0	0	0	0	0	0	0	0	0	0	0	0
Roseiarcus	0	0	0	0	0	0	0	0	0	0	0	0	0	0	0	0	0	0	0	0	0	0	0	0	0	0	0	0	0	0	0	0	0	0	0	0	0	0	0	0	0	0	0	0	0	0	0	0	0
Lysinibacillus	0	0	0	0	0	0	0	0	0	0	0	0	0	0	0	0	0	0	0	0.292184	0.0556793	0	0	0	0	0	0	0.329679	0	0	0	0	0	0	0	0	0	0	0.907885	0	0	0.137263	0	0	0	0	0	0	0
Pseudohongiella	0	0	0	0	0	0	0	0	0	0	0	0	0	0	0	0	0	0	0	0	0	0	0	0	0	0	0	0	0	0	0	0	0	0	0	0	0	0	0	0	0	0	0	0	0	0	0	0	0
Methylorosula	0	0	0	0	0	0	0	0	0	0	0	0	0	0	0	0	0	0	0	0	0	0	0	0	0	0	0	0	0	0	0	0	0	0	0	0	0	0	0	0	0	0	0	0	0	0	0	0	0
Raoultella	0	0	0	0	0	0	0	0	0	0	0	0	0	0	0	0	0	0	0	0	0	0	0	0	0	0	0	0	0	0	0	0	0	0	0	0	0	0	0	0	0	0	0	0	0	0	0	0	0
Saccharothrix	0	0	0	0	0	0	0	0	0	0	0	0	0	0	0	0	0	0	0	0	0	0	0	0	0	0	0	0	0	0	0	0	0	0	0	0	0	0	0	0	0	0	0	0	0	0	0	0	0
Varibaculum	0	0	0	0	0	0	0	0	0	0	0	0	0	0	0	0	0	0	0	0	0	0	0	0	0	0	0	0	0	0	0	0	0	0	0	0	0	0	0	0	0	0	0	0	0	0	0	0	0
Enterorhabdus	0	0	0	0	0	0	0	0	0	0	0	0	0	0	0	0	0	0	0	0	0	0	0	0	0	0	0	0	0	0	0	0	0	0	0	0	0	0	0	0	0	0	0	0	0	0	0	0	0
Aeribacillus	0	0	0	0	0	0	0	0	0	0	0	0	0	0	0	0	0	0	0	0	0	0	0	0	0	0	0	0	0	0	0	0	0	0	0	0	0	0	0	0	0	0	0	0	0	0	0	0	0
CyanobiumPCC6307	0	0	0	0	0	0	0	0	0	0	0	0	0	0	0	0	0	0	0	0	0	0	0	0	0	0	0	0	0	0	0	0	0	0	0	0	0	0	0	0	0	0	0	0	0	0	0	0	0
Roseburia	0	0	0	0	0	0	0	0	0	0	0	0	0	0	0	0	0	0	0	0	0	0	0	0	0	0	0	0	0	0	0	0	0	0	0	0	0	0	0	0	0	0	0	0	0	0	0	0	0
Pseudoalteromonas	0	0	0	0	0	0	0	0	0	0	0	0	0	0	0	0	0	0	0	0	0	0	0	0	0	0	0	0	0	0	0	0	0	0	0	0	0	0	0	0	0	0	0	0	1.12706	0	0	0	0
Anaerocolumna	0	0	0	0	0	0	0	0	0	0	0	0	0	0	0	0	0	0	0	0	0	0	0	0	0	0	0	0	0	0	0	0	0	0	0	0	0	0	0	0	0	0	0	0	0	0	0	0	0
Megasphaera	0	0	0	0	0	0	0	0	0	0	0	0	0	0	0	0	0	0	0	0	0	0	0	0	0	0	0	0	0	0	0	0	0	0	0	0	0	0	0	0	0	0	0	0	0	0	0	0	0
Diptera	0	0	0	0	0	0	0	0	0	0	0	0	0	0	0	0	0	0	0	0	0	0	0	0	0	0	0	0	0	0	0	0	0	0	0	0	0	0	0	0	0	0	0	0	0	0	0	0	0
Friedmanniella	0	0	0	0	0	0	0	0	0	0	0	0	0	0	0	0	0	0	0	0	0	0	0	0	0	0	0	0	0	0	0	0	0	0	0	0	0	0	0	0	0	0	0	0	0	0	0	0	0
Paenalcaligenes	0	0	0	0	0	0	0	0	0	0	0	0	0	0	0	0	0	0	0	0	0	0	0	0	0	0	0	0	0	0	0	0	0	0	0	0	0	0	0	0	0	0	0	0	0	0	0	0	0
Verrucomicrobium	0	0	0	0	0	0	0	0	0	0	0	0	0	0	0	0	0	0	0	0	0	0	0	0	0	0	0	0	0	0	0	0	0	0	0	0	0	0	0	0	0	0	0	0	0	0	0	0	0
Camelimonas	0	0	0	0	0	0	0	0	0	0	0	0	0	0	0	0	0	0	0	0	0	0	0	0	0	0	0	0	0	0	0	0	0	0	0	0	0	0	0	0	0	0	0	0	0	0	0	0	0
Vitreoscilla	0	0	0	0	0	0	0	0	0	0	0	0	0	0	0	0	0	0	0	0	0	0	0	0	0	0	0	0	0	0	0	0	0	0	0	0	0	0	0	0	0	0	0	0	0	0	0	0	0
TC1	0	0	0	0	0	0	0	0	0	0	0	0	0	0	0	0	0	0	0	0	0	0	0	0	0	0	0	0	0	0	0	0	0	0	0	0	0	0	0	0	0	0	0	0	0	0	0	0	0
Ornithinicoccus	0	0	0	0	0	0	0	0	0	0	0	0	0	0	0	0	0	0	0	0	0	0	0	0	0	0	0	0	0	0	0	0	0	0	0	0	0	0	0	0	0	0	0	0	0	0	0	0	0
AB1	0	0	0	0	0	0	0	0	0	0	0	0	0	0	0	0	0	0	0	0	0	0	0	0	0	0	0	0	0	0	0	0	0	0	0	0	0	0	0	0	0	0	0	0	0	0	0	0	0
JGI0000069P22	0	0	0	0	0	0	0	0	0	0	0	0	0	0	0	0	0	0	0	0	0	0	0	0	0	0	0	0	0	0	0.350978	0	0	0	0	0	0	0	0	0	0	0	0	0	0	0	0	0	0
Larkinella	0	0	0	0	0	0	0	0	0	0	0	0	0	0	0	0	0	0	0	0	0	0	0	0	0	0	0	0	0	0	0	0	0	0	0	0	0	0	0	0	0	0	0	0	0	0	0	0	0
Arachidicoccus	0	0	0	0	0	0	0	0	0	0	0	0	0	0	0	0	0	0	0	0	0	0	0	0	0	0	0	0	0	0	0	0	0	0	0	0	0	0	0	0	0	0	0	0	0	0	0	0	0
Nitrolancea	0	0	0	0	0	0	0	0	0	0	0	0	0	0	0	0	0	0	0	0	0	0	0	0	0	0	0	0	0	0	0	0	0	0	0	0	0	0	0	0	0	0	0	0	0	0	0	0	0
Stackebrandtia	0	0	0	0	0	0	0	0	0	0	0	0	0	0	0	0	0	0	0	0	0	0	0	0	0	0	0	0	0	0	0	0	0	0	0	0	0	0	0	0	0	0	0	0	0	0	0	0	0
YooniaLoktanella	0	0	0	0	0	0	0	0	0	0	0	0	0	0	0	0	0	0	0	0	0	0	0	0	0	0	0	0	0	0	0	0	0	0	0	0	0	0	0	0	0	0	0	0	0	0	0	0	0
B17BS	0	0	0	0	0	0	0	0	0	0	0	0	0	0	0	0	0	0	0	0	0	0	0	0	0	0	0	0	0	0	0	0	0	0	0	0	0	0	0	0	0	0	0	0	0	0	0	0	0
Schlegelella	0	0	0	0	0	0	0	0	0	0	0	0	0	0	0	0	0	0	0	0	0	0	0	0	0	0	0	0	0	0	0	0	0	0	0	0	0	0	0	0	0	0	0	0	0	0	0	0	0
Tepidibacter	0	0	0	0	0	0	0	0	0	0	0	0	0	0	0	0	0	0	0	0	0	0	0	0	0	0	0	0	0	0	0	0	0	0	0	0	0	0	0	0	0	0	0	0	0	0	0	0	0
LCP89	0	0	0	0	0	0	0	0	0	0	0	0	0	0	0	0	0	0	0	0	0	0	0	0	0	0	0	0	0	0	0	0	0	0	0	0	0	0	0	0	0	0	0	0	0	0	0	0	0
Ornithobacterium	0	0	0	0	0	0	0	0	0	0	0	0	0	0	0	0	0	0	0	0	0	0	0	0	0	0	0	0	0	0	0	0	0	0	0	0	0	0	0	0	0	0	0	0	0	0	0	0	0
Kingella	0	0	0	0	0	0	0	0	0	0	0	0	0	0	0	0	0	0	0	0	0	0	0	0	0	0	0	0	0	0	0	0	0	0	0	0	0	0	0	0	0	0	0	0	0	0	0	0	0
Verticiella	0	0	0	0	0	0	0	0	0	0	0	0	0	0	0	0	0	0	0	0	0	0	0	0	0	0	0	0	0	0	0	0	0	0	0	0	0	0	0	0	0	0	0	0	0	0	0	0	0
Amnibacterium	0	0	0	0	0	0	0	0	0	0	0	0	0	0	0	0	0	0	0	0	0	0	0	0	0	0	0	0	0	0	0	0	0	0	0	0	0	0	0	0	0	0	0	0	0	0	0	0	0
Marinobacter	0	0	0	0	0	0	0	0	0	0	0	0	0	0	0	0	0	0	0	0	0	0	0	0	0	0	0	0	0	0	0	0	0	0	0	0	0	0	0	0	0	0	0	0	0	0	0	0	0
Aminobacter	0	0	0	0	0	0	0	0	0	0	0	0	0	0	0	0	0	0	0	0	0	0	0	0	0	0	0	0	0	0	0	0	0	0	0	0	0	0	0	0	0	0	0	0	0	0	0	0	0
Moheibacter	0	0	0	0	0	0	0	0	0	0	0	0	0	0	0	0	0	0	0	0	0	0	0	0	0	0	0	0	0	0	0	0	0	0	0	0	0	0	0	0	0	0	0	0	0	0	0	0	0
Persicitalea	0	0	0	0	0	0	0	0	0	0	0	0	0	0	0	0	0	0	0	0	0	0	0	0	0	0	0	0	0	0	0	0	0	0	0	0	0	0	0	0	0	0	0	0	0	0	0	0	0
LiUU11161	0	0	0	0	0	0	0	0	0	0	0	0	0	0	0	0	0	0	0	0	0	0	0	0	0	0	0	0	0	0	0	0	0	0	0	0	0	0	0	0	0	0	0	0.741251	0	0	0	0	0
Obscuribacteraceae	0	0	0	0	0	0	0	0	0	0	0	0	0	0	0	0	0	0	0	0	0	0	0	0	0	0	0	0	0	0	0	0	0	0	0	0	0	0	0	0	0	0	0	0	0	0	0	0	0
Leifsonia	0	0	0	0	0	0	0	0	0	0	0	0	0	0	0	0	0	0	0	0	0	0	0	0	0	0	0	0	0	0	0	0	0	0	0	0	0	0	0	0	0	0	0	0	0	1.02488	0	0.58729	0
Gilliamella	0	0	0	0	0	0	0	0	0	0	0	0	0	0	0	0	0	0	0	0	0	0	0	0	0	0	0	0	0	0	0	0	0	0	0	0	0	0	0	0	0	0	0	0	0	0	0	0	0
Enteractinococcus	0	0	0	0	0	0	0	0	0	0	0	0	0	0	0	0	0	0	0	0	0	0	0	0	0	0	0	0	0	0	0	0	0	0	0	0	0	0	0	0	0	0	0	0	0	0	0	0	0
Micromonospora	0	0	0	0	0	0	0	0	0	0	0	0	0	0	0	0	0	0	0	0	0	0	0	0	0	0	0	0	0	0	0	0	0	0	0	0	0	0	0	0	0	0	0	0	0	0	0	0	0
Tissierella	0	0	0	0	0	0	0	0	0	0	0	0	0	0	0	0	0	0	0	0	0	0	0	0	0	0	0	0	0	0	0	0	0	0	0	0	0	0	0	0	0	0	0	0	0	0	0	0	0
Rickettsia	0	0	0	0	0	0	0	0	0	0	0	0	0	0	0	0	0	0	0	0	0	0	0	0	0	0	0	0	0	0	0	0	0	0	0	0	0	0	0	0	0	0	0	0	0	0	0	0	0
Megamonas	0	0	0	0	0	0	0	0	0	0	0	0	0	0	0	0	0	0	0	0	0	0	0	0	0	0	0	0	0	0	0	0	0	0	0	0	0	0	0	0	0	0	0	0	0	0	0	0	0
Paenochrobactrum	0	0	0	0	0	0	0	0	0	0	0	0	0	0	0	0	0	0	0	0	0	0	0	0	0	0	0	0	0	0	0	0	0	0	0	0	0	0	0	0	0	0	0	0	0	0	0	0	0
MBNT15	0	0	0	0	0	0	0	0	0	0	0	0	0	0	0	0	0	0	0	0	0	0	0	0	0	0	0	0	0	0	0	0	0	0	0	0	0	0	0	0	0	0	0	0	0	0	0	0	0
Streptobacillus	0	0	0	0	0	0	0	0	0	0	0	0	0	0	0	0	0	0	0	0	0	0	0	0	0	0	0	0	0	0	0	0	0	0	0	0	0	0	0	0	0	0	0	0	0	0	0	0	0
Sodalis	0	0	0	0	0	0	0	0	0	0	0	0	0	0	0	0	0	0	0	0	0	0	0	0	0	0	0	0	0	0	0	0	0	0	0	0	0	0	0	0	0	0	0	0	0	0	0	0	0
Prosthecomicrobium	0	0	0	0	0	0	0	0	0	0	0	0	0	0	0	0	0	0	0	0	0	0	0	0	0	0	0	0	0	0	0	0	0	0	0	0	0	0	0	0	0	0	0	0	0	0	0	0	0
Rubrivirga	0	0	0	0	0	0	0	0	0	0	0	0	0	0	0	0	0	0	0	0	0	0	0	0	0	0	0	0	0	0	0	0	0	0	0	0	0	0	0	0	0	0	0	0	0	0	0	0	0
Xylophilus	0	0	0	0	0	0	0	0	0	0	0	0	0	0	0	0	0	0	0	0	0	0	0	0	0	0	0	0	0	0	0	0	0	0	0	0	0	0	0	0	0	0	0	0	0	0	0	0	0
Nesterenkonia	0	0	0	0	0	0	0	0	0	0	0	0	0	0	0	0	0	0	0	0	0	0	0	0	0	0	0	0	0	0	0	0	0	0	0	0	0	0	0	0	0	0	0	0	0	0	0	0	0
Niabella	0	0	0	0	0	0	0	0	0	0	0	0	0	0	0	0	0	0	0	0	0	0	0	0	0	0	0	0	0	0	0	0	0	0	0	0	0	0	0	0	0	0	0	0	0	0	0	0	0
TM7x	0	0	0	0	0	0	0	0	0	0	0	0	0	0	0	0	0	0	0	0	0	0	0	0	0	0	0	0	0	0	0	0	0	0	0	0	0	0	0	0	0	0	0	0	0	0	0	0	0
Treponema	0	0	0	0	0	0	0	0	0	0	0	0	0	0	0	0	0	0	0	0	0	0	0	0	0	0	0	0	0	0	0	0	0	0	0	0	0	0	0	0	0	0	0	0	0	0	0	0	0
F0332	0	0	0	0	0	0	0	0	0	0	0	0	0	0	0	0	0	0	0	0	0	0	0	0	0	0	0	0	0	0	0	0	0	0	0	0	0	0	0	0	0	0	0	0	0	0	0	0	0
Johnsonella	0	0	0	0	0	0	0	0	0	0	0	0	0	0	0	0	0	0	0	0	0	0	0	0	0	0	0	0	0	0	0	0	0	0	0	0	0	0	0	0	0	0	0	0	0	0	0	0	0
Ethanoligenens	0	0	0	0	0.130844	0	0	0	0	0	0	0	0	0	0	0	0	0	0	0	0	0	0	0	0	0	0	0	0	0	0	0	0	0	0	0	0	0	0	0	0	0	0	0	0	0	0	0	0
Constrictibacter	0	0	0	0	0	0	0	0	0	0	0	0	0	0	0	0	0	0	0	0	0	0	0	0	0	0	0	0	0	0	0	0	0	0	0	0	0	0	0	0	0	0	0	0	0	0	0	0	0
Magnetospirillum	0	0	0	0	0	0	0	0	0	0	0	0	0	0	0	0	0	0	0	0	0	0	0	0	0	0	0	0	0	0	0	0	0	0	0	0	0	0	0	0	0	0	0	0	0	0	0	0	0
Roseateles	0	0	0	0	0	0	0	0	0	0	0	0	0	0	0	0	0	0	0	0	0	0	0	0	0	0	0	0	0	0	0	0	0	0	0	0	0	0	0	0	0	0	0	0	0	0	0.0926431	0	0
Anaeroplasma	0	0	0	0	0	0	0	0	0	0	0	0	0	0	0	0	0	0	0	0	0	0	0	0	0	0	0	0	0	0	0	0	0	0	0	0	0	0	0	0	0	0	0	0	0	0	0	0	0
DS100	0	0	0	0	0	0	0	0	0	0	0	0	0	0	0	0	0	0	0	0	0	0	0	0	0	0	0	0	0	0	0	0	0	0	0	0	0	0	0	0	0	0	0	0	0	0	0	0	0
Rodentibacter	0	0	0	0	0	0	0	0	0	0	0	0	0	0	0	0	0	0	0	0	0	0	0	0	0	0	0	0	0	0	0	0	0	0	0	0	0	0	0	0	0	0	0	0	0	0	0	0	0
Marisediminicola	0	0	0	0	0	0	0	0	0	0	0	0	0	0	0	0	0	0	0	0	0	0	0	0	0	0	0	0	0	0	0	0	0	0	0	0	0	0	0	0	0	0	0	0	0	0	0	0	0
Colwellia	0	0	0	0	0	0	0	0	0	0	0	0	0	0	0	0	0	0	0	0	0	0	0	0	0	0	0	0	0	0	0	0	0	0	0	0	0	0	0	0	0	0	0	0	0	0	0	0	0
Coprococcus	0	0	0	0	0	0	0	0	0	0	0	0	0	0	0	0	0	0	0	0	0	0	0	0	0	0	0	0	0	0	0	0	0	0	0	0	0	0	0	0	0	0	0	0	0	0	0	0	0
Pelagibacterium	0	0	0	0	0	0	0	0	0	0	0	0	0	0	0	0	0	0	0	0	0	0	0	0	0	0	0	0	0	0	0	0	0	0	0	0	0	0	0	0	0	0	0	0	0	0	0	0	0
Atopobium	0	0	0	0	0	0	0	0	0	0	0	0	0	0	0	0	0	0	0	0	0	0	0	0	0	0	0	0	0	0	0	0	0	0	0	0	0	0	0	0	0	0	0	0	0	0	0	0	0
Oceanospirillum	0	0	0	0	0	0	0	0	0	0	0	0	0	0	0	0	0	0	0	0	0	0	0	0	0	0	0	0	0	0	0	0	0	0	0	0	0	0	0	0	0	0	0	0	0	0	0	0	0
Macellibacteroides	0	0	0	0	0	0	0	0	0	0	0	0	0	0	0	0	0	0	0	0	0	0	0	0	0	0	0	0	0	0	0	0	0	0	0	0	0	0	0	0	0	0	0	0	0	0	0	0	0
Salinicoccus	0	0	0	0	0	0	0	0	0	0	0	0	0	0	0	0	0	0	0	0	0	0	0	0	0	0	0	0	0	0	0	0	0	0	0	0	0	0	0	0	0	0	0	0	0	0	0	0	0
Nordella	0	0	0	0	0	0	0	0	0	0	0	0	0	0	0	0	0	0	0	0	0	0	0	0	0	0	0	0	0	0	0	0	0	0	0	0	0	0	0	0	0	0	0	0	0	0	0	0	0
Collinsella	0	0	0	0	0	0	0	0	0	0	0	0	0	0	0	0	0	0	0	0	0	0	0	0	0	0	0	0	0	0	0	0	0	0	0	0	0	0	0	0	0	0	0	0	0	0	0	0	0
Chryseomicrobium	0	0	0	0	0	0	0	0	0	0	0	0	0	0	0	0	0	0	0	0	0	0	0	0	0	0	0	0	0	0	0	0	0	0	0	0	0	0	0	0	0	0	0	0	0	0	0	0	0
HNHF0106	0	0	0	0	0	0	0	0	0	0	0	0	0	0	0	0	0	0	0	0	0	0	0	0	0	0	0	0	0	0	0	0	0	0	0	0	0	0	0	0	0	0	0	0	0	0	0	0	0
Parafilimonas	0	0	0	0	0	0	0	0	0	0	0	0	0	0	0	0	0	0	0	0	0	0	0	0	0	0	0	0	0	0	0	0	0	0	0	0	0	0	0	0	0	0	0	0	0	0	0	0	0
Salinimicrobium	0	0	0	0	0	0	0	0	0	0	0	0	0	0	0	0	0	0	0	0	0	0	0	0	0	0	0	0	0	0	0	0	0	0	0	0	0	0	0	0	0	0	0	0	0	0	0	0	0
CandidatusLimnoluna	0	0	0	0	0	0	0	0	0	0	0	0	0	0	0	0	0	0	0	0	0	0	0	0	0	0	0	0	0	0	0	0	0	0	0	0	0	0	0	0	0	0	0	0	0	0	0	0	0
TRA320	0	0	0	0	0	0	0	0	0	0	0	0	0	0	0	0	0	0	0	0	0	0	0	0	0	0	0	0	0	0	0	0	0	0	0	0	0	0	0	0	0	0	0	0	0	0	0	0	0
Babeliaceae	0	0	0	0	0	0	0	0	0	0	0	0	0	0	0	0	0	0	0	0	0	0	0	0	0	0	0	0	0	0	0	0	0	0	0	0	0	0	0	0	0	0	0	0	0	0	0	0	0
Pseudolabrys	0	0.400305	0	0	0.734739	0	0	0.546124	0	0	0	0.254676	0	0	0	0	0	0.381098	0	0	0	0	0	0	0	0	0	0	0	0	0	0	0	0	0	0	0	0	0	0	0	0	0	0	0	0	0	0	0
Parabacteroides	0	0	0	0	0	0	0	0	0	0	0	0	0	0	0	0	0	0	0	0	0	0	0	0	0	0	0	0	0	0	0	0	0	0	0	0	0	0	0	0	0	0	0	0	0	0	0	0	0
YCZSSLKJ147	0	0	0	0	0	0	0	0	0	0	0	0	0	0	0	0	0	0	0	0	0	0	0	0	0	0	0	0	0	0	0	0	0	0	0	0	0	0	0	0	0	0	0	0	0	0	0	0	0
WS2	0	0	0	0	0	0	0	0	0	0	0	0	0	0	0	0	0	0	0	0	0	0	0	0	0	0	0	0	0	0	0	0	0	0	0	0	0	0	0	0	0	0	0	0	0	0	0	0	0
Dermacoccus	0	0	0	0	0	0	0	0	0	0	0	0	0	0	0	0	0	0	0	0	0	0	0	0	0	0	0	0	0	0	0	0	0	0	0	0	0	0	0	0	0	0	0	0	0	0	0	0	0
Pseudogracilibacillus	0	0	0	0	0	0	0	0	0	0	0	0	0	0	0	0	0	0	0	0	0	0	0	0	0	0	0	0	0	0	0	0	0	0	0	0	0	0	0	0	0	0	0	0	0	0	0	0	0
Berkelbacteria	0	0	0	0	0	0	0	0	0	0	0	0	0	0	0	0	0	0	0	0	0	0	0	0	0	0	0	0	0	0	0	0	0	0	0	0	0	0	0	0	0	0	0	0	0	0	0	0	0.996697
Parcubacteria	0	0	0	0	0	0	0	0	0	0	0	0	0	0	0	0	0	0	0	0	0	0	0	0	0	0	0	0	0	0	0	0	0	0	0	0	0	0	0	0	0	0	0	0	0	0	0	0	0
HafniaObesumbacterium	0	0	0	0	0	0	0	0	0	0	0	0	0	0	0	0	0	0	0	0	0	0	0	0	0	0	0	0	0	0	0	0	0	0	0	0	0	0	0	0	0	0	0	0	0	0	0	0	0
Dokdonia	0	0	0	0	0	0	0	0	0	0	0	0	0	0	0	0	0	0	0	0	0	0	0	0	0	0	0	0	0	0	0	0	0	0	0	0	0	0	0	0	0	0	0	0	0	0	0	0	0
Monoglobus	0	0	0	0	0	0	0	0	0	0	0	0	0	0	0	0	0	0	0	0	0	0	0	0	0	0	0	0	0	0	0	0	0	0	0	0	0	0	0	0	0	0	0	0	0	0	0	0	0
Agitococcuslubricusgroup	0	0	0	0	0	0	0	0	0	0	0	0	0	0	0	0	0	0	0	0	0	0	0	0	0	0	0	0	0	0.61457	0	0	0	0	0	0	0	0	0	0	0	0	0	0	0	0	0	0	0
Vampirovibrionales	0	0	0	0	0	0	0	0	0	0	0	0	0	0	0	0	0	0	0	0	0	0	0	0	0	0	0	0	0	0	0	0	0	0	0	0.115517	0	0	0	0	0	0	0	0	0	0	0	0	0
Opitutus	0	0	0	0	0	0	0	0	0	0	0	0	0	0	0	0	0	0	0	0	0	0	0	0	0	0	0	0	0	0	0	0	0	0	0	0	0	0	0	0	0	0	0	0	0	0	0	0	0
Eubacteriumxylanophilumgroup	0	0	0	0	0	0	0	0	0	0	0	0	0	0	0	0	0	0	0	0	0	0	0	0	0	0	0	0	0	0	0	0	0	0	0	0	0	0	0	0	0	0	0	0	0	0	0	0	0
Pedosphaeraceae	0	0	0	0	0	0	0	0	0	0	0	0	0	0	0	0	0	0	0	0	0	0	0	0	0	0	0	0	0	0	0	0	0	0	0	0	0	0	0	0	0	0	0	0	0	0	0	0	0
Frisingicoccus	0	0	0	0	0	0	0	0	0	0	0	0	0	0	0	0	0	0	0	0	0	0	0	0	0	0	0	0	0	0	0	0	0	0	0	0	0	0	0	0	0	0	0	0	0	0	0	0	0
TM7	0	0	0	0	0	0	0	0	0	0	0	0	0	0	0	0	0	0	0	0	0	0	0	0	0	0	0	0	0	0	0	0	0	0	0	0	0	0	0	0	0	0	0	0	0	0	0	0	0
Winogradskyella	0	0	0	0	0	0	0	0	0	0	0	0	0	0	0	0	0	0	0	0	0	0	0	0	0	0	0	0	0	0	0	0	0	0	0	0	0	0	0	0	0	0	0	0	0	0	0	0	0
CandidatusPeregrinibacteria	0	0	0	0	0	0	0	0	0	0	0	0	0	0	0	0	0	0	0	0	0	0	0	0	0	0	0	0	0	0	0	0	0	0	0	0	0	0	0	0	0	0	0	0	0	0	0	0	0
Elstera	0	0	0	0	0	0	0	0	0	0	0	0	0	0	0	0	0	0	0	0	0	0	0	0	0	0	0	0	0	0	0	0	0	0	0	0	0	0	0	0	0	0	0	0	0	0	0	0	0
Tolypothrix	0	0	0	0	0	0	0	0	0	0	0	0	0	0	0	0	0	0	0	0	0	0	0	0	0	0	0	0	0	0	0	0	0	0	0	0	0	0	0	0	0	0	0	0	0	0	0	0	0
RikenellaceaeRC9gutgroup	0	0	0	0	0	0	0	0	0	0	0	0	0	0	0	0	0	0	0	0	0	0	0	0	0	0	0	0	0	0	0	0	0	0	0	0	0	0	0	0	0	0	0	0	0	0	0	0	0
LineageIIb	0	0	0	0	0	0	0	0	0	0	0	0	0	0	0	0	0	0	0	0	0	0	0	0	0	0	0	0	0	0	0	0	0	0	0	0	0	0	0	0	0	0	0	0	0	0	0	0	0
Caldibacillus	0	0	0	0	0	0	0	0	0	0	0	0	0	0	0	0	0	0	0	0	0	0	0	0	0	0	0	0	0	0	0	0	0	0	0	0	0	0	0	0	0	0	0	0	0	0	0	0	0
Solobacterium	0	0	0	0	0	0	0	0	0	0	0	0	0	0	0	0	0	0	0	0	0	0	0	0	0	0	0	0	0	0	0	0	0	0	0	0	0	0	0	0	0	0	0	0	0	0	0	0	0
Leptothrix	0	0	0	0	0	0	0	0	0	0	0	0	0	0	0	0	0	0	0	0	0	0	0	0	0	0	0	0	0	0	0	0	0	0	0	0	0	0	0	0	0	0	0	0	0	0	0	0	0
Sideroxydans	0	0	0	0	0	0	0	0	0	0	0	0	0	0	0	0	0	0	0	0	0	0	0	0	0	0	0	0	0	0	0	0	0	0	0	0	0	0	0	0	0	0	0	0	0	0	0	0	0
BacteroidetesvadinHA17	0	0	0	0	0	0	0	0	0	0	0	0	0	0	0	0	0	0	0	0	0	0	0	0	0	0	0	0	0	0	0	0	0	0	0	0	0	0	0	0	0	0	0	0	0	0	0	0	0
Tsukamurella	0	0	0	0	0	0	0	0	0	0	0	0	0	0	0	0	0	0	0	0	0	0	0	0	0	0	0	0	0	0	0	0	0	0	0	0	0	0	0	0	0	0	0	0	0	0	0	0	0
Salinicola	0	0	0	0	0	0	0	0	0	0	0	0	0	0	0	0	0	0	0	0	0	0	0	0	0	0	0	0	0	0	0	0	0	0	0	0	0	0	0	0	0	0	0	0	0	0	0	0	0
Tahibacter	0	0	0	0	0	0	0	0	0	0	0	0	0	0	0	0	0	0	0	0	0	0	0	0	0	0	0	0	0	0	0	0	0	0	0	0.963971	0	0	0	0	0	0	0	0	0	0	0	0	0
Pseudactinotalea	0	0	0	0	0	0	0	0	0	0	0	0	0	0	0	0	0	0	0	0	0	0	0	0	0	0	0	0	0	0	0	0	0	0	0	0	0	0	0	0	0	0	0	0	0	0	0	0	0
Pseudofulvimonas	0	0	0	0	0	0	0	0	0	0	0	0	0	0	0	0	0	0	0	0	0	0	0	0	0	0	0	0	0	0	0	0	0	0	0	0	0	0	0	0	0	0	0	0	0	0	0	0	0
Afipia	0	0	0	0	0	0	0	0	0	0	0	0	0	0	0	0	0	0	0	0	0	0	0	0	0	0	0	0	0	0	0	0	0	0	0	0	0	0	0	0	0	0	0	0	0	0	0	0	0
Sva0996marinegroup	0	0	0	0	0	0	0	0	0	0	0	0	0	0	0	0	0	0	0	0	0	0	0	0	0	0	0	0	0	0	0	0	0	0	0	0	0	0	0	0	0	0	0	0	0	0	0	0	0
Subgroup5	0	0	0	0	0	0	0	0	0	0	0	0	0	0	0	0	0	0	0	0	0	0	0	0	0	0	0	0	0	0	0	0	0	0	0	0	0	0	0	0	0	0	0	0	0	0	0	0	0
CandidatusKaiserbacteria	0	0	0	0	0	0	0	0	0	0	0	0	0	0	0	0	0	0	0	0	0	0	0	0	0	0	0	0	0	0	0	0	0	0	0	0	0	0	0	0	0	0	0	0	0	0	0	0	0
Cellulosimicrobium	0	0	0	0	0	0	0	0	0	0	0	0	0	0	0	0	0	0	0	0	0	0	0	0	0	0	0	0	0	0	0	0	0	0	0	0	0	0	0	0	0	0	0	0	0	0	0	0	0
Sphingosinicella	0	0	0	0	0	0	0	0	0	0	0	0	0	0	0	0	0	0	0	0	0	0	0	0	0	0	0	0	0	0	0	0	0	0	0	0	0	0	0	0	0	0	0	0	0	0	0	0	0
SCI84	0	0	0	0	0	0	0	0	0	0	0	0	0	0	0	0	0	0	0	0	0	0	0	0	0	0	0	0	0	0	0	0	0	0	0	0	0	0	0	0	0	0	0	0	0	0	0	0	0
MND1	0	0	0	0	0	0	0	0	0	0	0	0	0	0	0	0	0	0	0	0	0	0	0	0	0	0	0	0	0	0	0	0	0	0	0	0	0	0	0	0	0	0	0	0	0	0	0	0	0
CandidatusStoquefichus	0	0	0	0	0	0	0	0	0	0	0	0	0	0	0	0	0	0	0	0	0	0	0	0	0	0	0	0	0	0	0	0	0	0	0	0	0	0	0	0	0	0	0	0	0	0	0	0	0
Rhodocytophaga	0	0	0	0	0	0	0	0	0	0	0	0	0	0	0	0	0	0	0	0	0	0	0	0	0	0	0	0	0	0	0	0	0	0	0	0	0	0	0	0	0	0	0	0	0	0	0	0	0
Modestobacter	0	0	0	0	0	0	0	0	0	0	0	0	0	0	0	0	0	0	0	0	0	0	0	0	0	0	0	0	0	0	0	0	0	0	0	0	0	0	0	0	0	0	0	0	0	0	0	0	0
BIrii41	0	0	0	0	0	0	0	0	0	0	0	0	0	0	0	0	0	0	0	0	0	0	0	0	0	0	0	0	0	0	0	0	0	0	0	0	0	0	0	0	0	0	0	0	0	0	0	0	0
Phytohabitans	0	0	0	0	0	0	0	0	0	0	0	0	0	0	0	0	0	0	0	0	0	0	0	0	0	0	0	0	0	0	0	0	0	0	0	0	0	0	0	0	0	0	0	0	0	0	0	0	0
Nosocomiicoccus	0	0	0	0	0	0	0	0	0	0	0	0	0	0	0	0	0	0	0	0	0	0	0	0	0	0	0	0	0	0	0	0	0	0	0	0	0	0	0	0	0	0	0	0	0	0	0	0	0
SB5	0	0	0	0	0	0	0	0	0	0	0	0	0	0	0	0	0	0	0	0	0	0	0	0	0	0	0	0	0	0	0	0	0	0	0	0	0	0	0	0	0	0	0	0	0	0	0	0	0
Desulfosporosinus	0	0	0	0	0	0	0	0	0	0	0	0	0	0	0	0	0	0	0	0	0	0	0	0	0	0	0	0	0	0	0	0	0	0	0	0	0	0	0	0	0	0	0	0	0	0	0	0	0
ScytonemaUTEX2349	0	0	0	0	0	0	0	0	0	0	0	0	0	0	0	0	0	0	0	0	0	0	0	0	0	0	0	0	0	0	0	0	0	0	0	0	0	0	0	0	0	0	0	0	0	0	0	0	0
Proteiniclasticum	0	0	0	0	0	0	0	0	0	0	0	0	0	0	0	0	0	0	0	0	0	0	0	0	0	0	0	0	0	0	0	0	0	0	0	0	0	0	0	0	0	0	0	0	0	0	0	0	0
Vampirovibrio	0	0	0	0	0	0	0	0	0	0	0	0	0	0	0	0	0	0	0	0	0	0	0	0	0	0	0	0	0	0	0	0	0	0	0	0	0	0	0	0	0	0	0	0	0	0	0	0	0
Fenollaria	0	0	0	0	0	0	0	0	0	0	0	0	0	0	0	0	0	0	0	0	0	0	0	0	0	0	0	0	0	0	0	0	0	0	0	0	0	0	0	0	0	0	0	0	0	0	0	0	0
Thiopseudomonas	0	0	0	0	0	0	0	0	0	0	0	0	0	0	0	0	0	0	0	0	0	0	0	0	0	0	0	0	0	0	0	0	0	0	0	0	0	0	0	0	0	0	0	0	0	0	0	0	0
Alcaligenes	0	0	0	0	0	0	0	0	0	0	0	0	0	0	0	0	0	0	0	0	0	0	0	0	0	0	0	0	0	0	0	0	0	0	0	0	0	0	0	0	0	0	0	0	0	0	0	0	0
Azorhizobium	0	0	0	0	0	0	0	0	0	0	0	0	0	0	0	0	0	0	0	0	0	0	0	0	0	0	0	0	0	0	0	0	0	0	0	0	0	0	0	0	0	0	0	0	0	0	0	0	0
Pseudoclavibacter	0	0	0	0	0	0	0	0	0	0	0	0	0	0	0	0	0	0	0	0	0	0	0	0	0	0	0	0	0	0	0	0	0	0	0	0	0	0	0	0	0	0	0	0	0	0	0	0	0
LachnospiraceaeNK3A20group	0	0	0	0	0	0	0	0	0	0	0	0	0	0	0	0	0	0	0	0	0	0	0	0	0	0	0	0	0	0	0	0	0	0	0	0	0	0	0	0	0	0	0	0	0	0	0	0	0
Stenotrophobacter	0	0	0	0	0	0	0	0	0	0	0	0	0	0	0	0	0	0	0	0	0	0	0	0	0	0	0	0	0	0	0	0	0	0	0	0	0	0	0	0	0	0	0	0	0	0	0	0	0
Filifactor	0	0	0	0	0	0	0	0	0	0	0	0	0	0	0	0	0	0	0	0	0	0	0	0	0	0	0	0	0	0	0	0	0	0	0	0	0	0	0	0	0	0	0	0	0	0	0	0	0
Eikenella	0	0	0	0	0	0	0	0	0	0	0	0	0	0	0	0	0	0	0	0	0	0	0	0	0	0	0	0	0	0	0	0	0	0	0	0	0	0	0	0	0	0	0	0	0	0	0	0	0
Paludisphaera	0	0	0	0	0	0	0	0	0	0	0	0	0	0	0	0	0	0	0	0	0	0	0	0	0	0	0	0	0	0	0	0	0	0	0	0	0	0	0	0	0	0	0	0	0	0	0	0	0
Fretibacterium	0	0	0	0	0	0	0	0	0	0	0	0	0	0	0	0	0	0	0	0	0	0	0	0	0	0	0	0	0	0	0	0	0	0	0	0	0	0	0	0	0	0	0	0	0	0	0	0	0
Brochothrix	0	0	0	0	0	0	0	0	0	0	0	0	0	0	0	0	0	0	0	0	0	0	0	0	0	0	0	0	0	0	0	0	0	0	0	0	0	0	0	0	0	0	0	0	0	0	0	0	0
Quadrisphaera	0	0	0	0	0	0	0	0	0	0	0	0	0	0	0	0	0	0	0	0	0	0	0	0	0	0	0	0	0	0	0	0	0	0	0	0	0	0	0	0	0	0	0	0	0	0	0	0	0
Avibacterium	0	0	0	0	0	0	0	0	0	0	0	0	0	0	0	0	0	0	0	0	0	0	0	0	0	0	0	0	0	0	0	0	0	0	0	0	0	0	0	0	0	0	0	0	0	0	0	0	0
BSV13	0	0	0	0	0	0	0	0	0	0	0	0	0	0	0	0	0	0	0	0	0	0	0	0	0	0	0	0	0	0	0	0	0	0	0	0	0	0	0	0	0	0	0	0	0	0	0	0	0
Thermoanaerobacterium	0	0	0	0	0	0	0	0	0	0	0	0	0	0	0	0	0	0	0	0	0	0	0	0	0	0	0	0	0	0	0	0	0	0	0	0	0	0	0	0	0	0	0	0	0	0	0	0	0
Agrococcus	0	0	0	0	0	0	0	0	0	0	0	0	0	0	0	0	0	0	0	0	0	0	0	0	0	0	0	0	0	0	0	0	0	0	0	0	0	0	0	0	0	0	0	0	0	0	0	0	0
Myxococcus	0	0	0	0	0	0	0	0	0	0	0	0	0	0	0	0	0	0	0	0	0	0	0	0	0	0	0	0	0	0	0	0	0	0	0	0	0	0	0	0	0	0	0	0	0	0	0	0	0
CoriobacteriaceaeUCG002	0	0	0	0	0	0	0	0	0	0	0	0	0	0	0	0	0	0	0	0	0	0	0	0	0	0	0	0	0	0	0	0	0	0	0	0	0	0	0	0	0	0	0	0	0	0	0	0	0
Sulfurifustis	0	0	0	0	0	0	0	0	0	0	0	0	0	0	0	0	0	0	0	0	0	0	0	0	0	0	0	0	0	0	0	0	0	0	0	0	0	0	0	0	0	0	0	0	0	0	0	0	0
Dubosiella	0	0	0	0	0	0	0	0	0	0	0	0	0	0	0	0	0	0	0	0	0	0	0	0	0	0	0	0	0	0	0	0	0	0	0	0	0	0	0	0	0	0	0	0	0	0	0	0	0
CandidatusChloroploca	0	0	0	0	0	0	0	0	0	0	0	0	0	0	0	0	0	0	0	0	0	0	0	0	0	0	0	0	0	0	0	0	0	0	0	0	0	0	0	0	0	0	0	0	0	0	0	0	0
Actinotalea	0	0	0	0	0	0	0	0	0	0	0	0	0	0	0	0	0	0	0	0	0	0	0	0	0	0	0	0	0	0	0	0	0	0	0	0	0	0	0	0	0	0	0	0	0	0	0	0	0
Flavihumibacter	0	0	0	0	0	0	0	0	0	0	0	0	0	0	0	0	0	0	0	0	0	0	0	0	0	0	0	0	0	0	0	0	0	0	0	0	0	0	0	0	0	0	0	0	0	0	0	0	0
M2PB465termitegroup	0	0	0	0	0	0	0	0	0	0	0	0	0	0	0	0	0	0	0	0	0	0	0	0	0	0	0	0	0	0	0	0	0	0	0	0	0	0	0	0	0	0	0	0	0	0	0	0	0
Hungateiclostridium	0	0	0	0	0	0	0	0	0	0	0	0	0	0	0	0	0	0	0	0	0	0	0	0	0	0	0	0	0	0	0	0	0	0	0	0	0	0	0	0	0	0	0	0	0	0	0	0	0
Nitrosomonas	0	0	0	0	0	0	0	0	0	0	0	0	0	0	0	0	0	0	0	0	0	0	0	0	0	0	0	0	0	0	0	0	0	0	0	0	0	0	0	0	0	0	0	0	0	0	0	0	0
TM7a	0	0	0	0	0	0	0	0	0	0	0	0	0	0	0	0	0	0	0	0	0	0	0	0	0	0	0	0	0	0	0	0	0	0	0	0	0	0	0	0	0	0	0	0	0	0	0	0	0
SynechococcusCC9902	0	0	0	0	0	0	0	0	0	0	0	0	0	0	0	0	0	0	0	0	0	0	0	0	0	0	0	0	0	0	0	0	0	0	0	0	0	0	0	0	0	0	0	0	0	0	0	0	0
Aneurinibacillus	0	0	0	0	0	0	0	0	0	0	0	0	0	0	0	0	0	0	0	0	0	0	0	0	0	0	0	0	0	0	0	0	0	0	0	0	0	0	0	0	0	0	0	0	0	0	0	0	0
Asanoa	0	0	0	0	0	0	0	0	0	0	0	0	0	0	0	0	0	0	0	0	0	0	0	0	0	0	0	0	0	0	0	0	0	0	0	0	0	0	0	0	0	0	0	0	0	0	0	0	0
Pseudochrobactrum	0	0	0	0	0	0	0	0	0	0	0	0	0	0	0	0	0	0	0	0	0	0	0	0	0	0	0	0	0	0	0	0	0	0	0	0	0	0	0	0	0	0	0	0	0	0	0	0	0
Chthonomonas	0	0	0	0	0	0	0	0	0	0	0	0	0	0	0	0	0	0	0	0	0	0	0	0	0	0	0	0	0	0	0	0	0	0	0	0	0	0	0	0	0	0	0	0	0	0	0	0	0
Hypnocyclicus	0	0	0	0	0	0	0	0	0	0	0	0	0	0	0	0	0	0	0	0	0	0	0	0	0	0	0	0	0	0	0	0	0	0	0	0	0	0	0	0	0	0	0	0	0	0	0	0	0
Ellin6067	0	0	0	0	0	0	0	0	0	0	0	0	0	0	0	0	0	0	0	0	0	0	0	0	0	0	0	0	0	0	0	0	0	0	0	0	0	0	0	0	0	0	0	0	0	0	0	0	0
JG30KFCM66	0	0	0	0	0	0	0	0	0	0	0	0	0	0	0	0	0	0	0	0	0	0	0	0	0	0	0	0	0	0	0	0	0	0	0	0	0	0	0	0	0	0	0	0	0	0	0	0	0
CAG352	0	0	0	0	0	0	0	0	0	0	0	0	0	0	0	0	0	0	0	0	0	0	0	0	0	0	0	0	0	0	0	0	0	0	0	0	0	0	0	0	0	0	0	0	0	0	0	0	0
Kineosporia	0	0	0	0	0	0	0	0	0	0	0	0	0	0	0	0	0	0	0	0	0	0	0	0	0	0	0	0	0	0	0	0	0	0	0	0	0	0	0	0	0	0	0	0	0	0	0	0	0
Flaviaesturariibacter	0	0	0	0	0	0	0	0	0	0	0	0	0	0	0	0	0	0	0	0	0	0	0	0	0	0	0	0	0	0	0	0	0	0	0	0	0	0	0	0	0	0	0	0	0	0	0	0	0
Pontibacter	0	0	0	0	0	0	0	0	0	0	0	0	0	0	0	0	0	0	0	0	0	0	0	0	0	0	0	0	0	0	0	0	0	0	0	0	0	0	0	0	0	0	0	0	0	0	0	0	0
Aquamicrobium	0	0	0	0	0	0	0	0	0	0	0	0	0	0	0	0	0	0	0	0	0	0	0	0	0	0	0	0	0	0	0	0	0	0	0	0	0	0	0	0	0	0	0	0	0	0	0	0	0
Natribacillus	0	0	0	0	0	0	0	0	0	0	0	0	0	0	0	0	0	0	0	0	0	0	0	0	0	0	0	0	0	0	0	0	0	0	0	0	0	0	0	0	0	0	0	0	0	0	0	0	0
Cytophagaxylanolyticagroup	0	0	0	0	0	0	0	0	0	0	0	0	0	0	0	0	0	0	0	0	0	0	0	0	0	0	0	0	0	0	0	0	0	0	0	0	0	0	0	0	0	0	0	0	0	0	0	0	0
Woeseia	0	0	0	0	0	0	0	0	0	0	0	0	0	0	0	0	0	0	0	0	0	0	0	0	0	0	0	0	0	0	0	0	0	0	0	0	0	0	0	0	0	0	0	0	0	0	0	0	0
PHOSHE36	0	0	0	0	0	0	0	0	0	0	0	0	0	0	0	0	0	0	0	0	0	0	0	0	0	0	0	0	0	0	0	0	0	0	0	0	0	0	0	0	0	0	0	0	0	0	0	0	0
SAR86clade	0	0	0	0	0	0	0	0	0	0	0	0	0	0	0	0	0	0	0	0	0	0	0	0	0	0	0	0	0	0	0	0	0	0	0	0	0	0	0	0	0	0	0	0	0	0	0	0	0
LachnospiraceaeUCG006	0	0	0	0	0	0	0	0	0	0	0	0	0	0	0	0	0	0	0	0	0	0	0	0	0	0	0	0	0	0	0	0	0	0	0	0	0	0	0	0	0	0	0	0	0	0	0	0	0
BIyi10	0	0	0	0	0	0	0	0	0	0	0	0	0	0	0	0	0	0	0	0	0	0	0	0	0	0	0	0	0	0	0	0	0	0	0	0	0	0	0	0	0	0	0	0	0	0	0	0	0
Aquimonas	0	0	0	0	0	0	0	0	0	0	0	0	0	0	0	0	0	0	0	0	0	0	0	0	0	0	0	0	0	0	0	0	0	0	0	0	0	0	0	0	0	0	0	0	0	0	0	0	0
Tyzzerella	0	0	0	0	0	0	0	0	0	0	0	0	0	0	0	0	0	0	0	0	0	0	0	0	0	0	0	0	0	0	0	0	0	0	0	0	0	0	0	0	0	0	0	0	0	0	0	0	0
Leuconostoc	0	0	0	0	0	0	0	0	0	0	0	0	0	0	0	0	0	0	0	0	0	0	0	0	0	0	0	0	0	0	0	0	0	0	0	0	0	0	0	0	0	0	0	0	0	0	0	0	0
Dokdonella	0	0	0	0	0	0	0	0	0	0	0	0	0	0	0	0	0	0	0	0	0	0	0	0	0	0	0	0	0	0	0	0	0	0	0	0	0	0	0	0	0	0	0	0	0	0	0	0	0
Azoarcus	0	0	0	0	0	0	0	0	0	0	0	0	0	0	0	0	0	0	0	0	0	0	0	0	0	0	0	0	0	0	0	0	0	0	0	0	0	0	0	0	0	0	0	0	0	0	0	0	0
OLB12	0	0	0	0	0	0	0	0	0	0	0	0	0	0	0	0	0	0	0	0	0	0	0	0	0	0	0	0	0	0	0	0	0	0	0	0	0	0	0	0	0	0	0	0	0	0	0	0	0
KD393	0	0	0	0	0	0	0	0	0	0	0	0	0	0	0	0	0	0	0	0	0	0	0	0	0	0	0	0	0	0	0	0	0	0	0	0	0	0	0	0	0	0	0	0	0	0	0	0	0
CandidatusWoesebacteria	0	0	0	0	0	0	0	0	0	0	0	0	0	0	0	0	0	0	0	0	0	0	0	0	0	0	0	0	0	0	0	0	0	0	0	0	0	0	0	0	0	0	0	0	0	0	0	0	0
CandidatusCaptivus	0	0	0	0	0	0	0	0	0	0	0	0	0	0	0	0	0	0	0	0	0	0	0	0	0	0	0	0	0	0	0	0	0	0	0	0	0	0	0	0	0	0	0	0	0	0	0	0	0
Tepidiphilus	0	0	0	0	0	0	0	0	0	0	0	0	0	0	0	0	0	0	0	0	0	0	0	0	0	0	0	0	0	0	0	0	0	0	0	0	0	0	0	0	0	0	0	0	0	0	0	0	0
KD310	0	0	0	0	0	0	0	0	0	0	0	0	0	0	0	0	0	0	0	0	0	0	0	0	0	0	0	0	0	0	0	0	0	0	0	0	0	0	0	0	0	0	0	0	0	0	0	0	0
Anaerosinus	0	0	0	0	0	0	0	0	0	0	0	0	0	0	0	0	0	0	0	0	0	0	0	0	0	0	0	0	0	0	0	0	0	0	0	0	0	0	0	0	0	0	0	0	0	0	0	0	0
Asinibacterium	0	0	0	0	0	0	0	0	0	0	0	0	0	0	0	0	0	0	0	0	0	0	0	0	0	0	0	0	0	0	0	0	0	0	0	0	0	0	0	0	0	0	0	0	0	0	0	0	0
Acetoanaerobium	0	0	0	0	0	0	0	0	0	0	0	0	0	0	0	0	0	0	0	0	0	0	0	0	0	0	0	0	0	0	0	0	0	0	0	0	0	0	0	0	0	0	0	0	0	0	0	0	0
Subdoligranulum	0	0	0	0	0	0	0	0	0	0	0	0	0	0	0	0	0	0	0	0	0	0	0	0	0	0	0	0	0	0	0	0	0	0	0	0	0	0	0	0	0	0	0	0	0	0	0	0	0
Desulfovermiculus	0	0	0	0	0	0	0	0	0	0	0	0	0	0	0	0	0	0	0	0	0	0	0	0	0	0	0	0	0	0	0	0	0	0	0	0	0	0	0	0	0	0	0	0	0	0	0	0	0
Timonella	0	0	0	0	0	0	0	0	0	0	0	0	0	0	0	0	0	0	0	0	0	0	0	0	0	0	0	0	0	0	0	0	0	0	0	0	0	0	0	0	0	0	0	0	0	0	0	0	0
Ensifer	0	0	0	0	0	0	0	0	0	0	0	0	0	0	0	0	0	0	0	0	0	0	0	0	0	0	0	0	0	0	0	0	0	0	0	0	0	0	0	0	0	0	0	0	0	0	0	0	0
FamilyXIIIUCG001	0	0	0	0	0	0	0	0	0	0	0	0	0	0	0	0	0	0	0	0	0	0	0	0	0	0	0	0	0	0	0	0	0	0	0	0	0	0	0	0	0	0	0	0	0	0.161145	0	0	0
Cohnella	0	0	0	0	0	0	0	0	0	0	0	0	0	0	0	0	0	0	0	0	0	0	0	0	0	0	0	0	0	0	0	0	0	0	0	0	0	0	0	0	0	0	0	0	0	0	0	0	0
Methylophaga	0	0	0	0	0	0	0	0	0	0	0	0	0	0	0	0	0	0	0	0	0	0	0	0	0	0	0	0	0	0	0	0	0	0	0	0	0	0	0	0	0	0	0	0	0	0	0	0	0
Proteus	0	0	0	0	0	0	0	0	0	0	0	0	0	0	0	0	0	0	0	0	0	0	0	0	0	0	0	0	0	0	0	0	0	0	0	0	0	0	0	0	0	0	0	0	0	0	0	0	0
BacteroidetesBD22	0	0	0	0	0	0	0	0	0	0	0	0	0	0	0	0	0	0	0	0	0	0	0	0	0	0	0	0	0	0	0	0	0	0	0	0	0	0	0	0	0	0	0	0	0	0	0	0	0
RsaHf231	0	0	0	0	0	0	0	0	0	0	0	0	0	0	0	0	0	0	0	0	0	0	0	0	0	0	0	0	0	0	0	0	0	0	0	0	0	0	0	0	0	0	0	0	0	0	0	0	0
Acidipila	0	0	0	0	0	0	0	0	0	0	0	0	0	0	0	0	0	0	0	0	0	0	0	0	0	0	0	0	0	0	0	0	0	0	0	0	0	0	0	0	0	0	0	0	0	0	0	0	0
Parasediminibacterium	0	0	0	0	0	0	0	0	0	0	0	0	0	0	0	0	0	0	0	0	0	0	0	0	0	0	0	0	0	0	0	0	0	0	0	0	0	0	0	0	0	0	0	0	0	0	0	0	0
Clostridiumsensustricto10	0	0	0	0	1.03165	0.840336	0	0	0	0	0	0	0.561462	0	0	0.615582	0	0	0.475999	0.142772	0	0	0.225183	0	0.121585	0	0	0	0	0	0	0	0	0	0	0	0	0	0	0	0	0	0	0	0	0	0	0	0
LineageIV	0	0	0	0	0	0	0	0	0	0	0	0	0	0	0	0	0	0	0	0	0	0	0	0	0	0	0	0	0	0	0	0	0	0	0	0	0	0	0	0	0	0	0.141012	0	0	0	0	0	0
Rubritepida	0	0	0	0	0	0	0	0	0	0	0	0	0	0	0	0	0	0	0	0	0	0	0	0	0	0	0	0	0	0	0	0	0	0	0	0	0	0	0	0	0	0	0	0	0	0	0	0	0
PlanktothrixNIVACYA15	0	0	0	0	0	0	0	0	0	0	0	0	0	0	0	0	0	0	0	0	0	0	0	0	0	0	0	0	0	0	0	0	0	0	0	0	0	0	0	0	0	0	0	0	0	0	0	0	0
Oleibacter	0	0	0	0	0	0	0	0	0	0	0	0	0	0	0	0	0	0	0	0	0	0	0	0	0	0	0	0	0	0	0	0	0	0	0	0	0	0	0	0	0	0	0	0	0	0	0	0	0
Salmonella	0	0	0	0	0	0	0	0	0	0	0	0	0	0	0	0	0	0	0	0	0	0	0	0	0	0	0	0	0	0	0	0	0	0	0	0	0	0	0	0	0	0	0	0	0	0	0	0	0
Anaerosporomusa	0	0	0	0	0	0	0	0	0	0	0	0	0	0	0	0	0	0	0	0	0	0	0	0	0	0	0	0	0	0	0	0	0	0	0	0	0	0	0	0	0	0	0	0	0	0	0	0	0
NostocPCC8976	0	0	0	0	0	0	0	0	0	0	0	0	0	0	0	0	0	0	0	0	0	0	0	0	0	0	0	0	0	0	0	0	0	0	0	0	0	0	0	0	0	0	0	0	0	0	0	0	0
Lachnoanaerobaculum	0	0	0	0	0	0	0	0	0	0	0	0	0	0	0	0	0	0	0	0	0	0	0	0	0	0	0	0	0	0	0	0	0	0	0	0	0	0	0	0	0	0	0	0	0	0	0	0	0
Simplicispira	0	0	0	0	0	0	0	0	0	0	0	0	0	0	0	0	0	0	0	0	0	0	0	0	0	0	0	0	0	0	0	0	0	0	0	0	0	0	0	0	0	0	0	0	0	0	0	0	0
Erysipelatoclostridium	0	0	0	0	0	0	0	0	0	0	0	0	0	0	0	0	0	0	0	0	0	0	0	0	0	0	0	0	0	0	0	0	0	0	0	0	0	0	0	0	0	0	0	0	0	0	0	0	0
Aquipuribacter	0	0	0	0	0	0	0	0	0	0	0	0	0	0	0	0	0	0	0	0	0	0	0	0	0	0	0	0	0	0	0	0	0	0	0	0	0	0	0	0	0	0	0	0	0	0	0	0	0
DNF00809	0	0	0	0	0	0	0	0	0	0	0	0	0	0	0	0	0	0	0	0	0	0	0	0	0	0	0	0	0	0	0	0	0	0	0	0	0	0	0	0	0	0	0	0	0	0	0	0	0
Tolumonas	0	0	0	0	0	0	0	0	0	0	0	0	0	0	0	0	0	0	0	0	0	0	0	0	0	0	0	0	0	0	0	0	0	0	0	0	0	0	0	0	0	0	0	0	0	0	0	0	0
Blvii28wastewatersludgegroup	0	0	0	0	0	0	0	0	0	0	0	0	0	0	0	0	0	0	0	0	0	0	0	0	0	0	0	0	0	0	0	0	0	0	0	0	0	0	0	0	0	0	0	0	0	0	0	0	0
JG36GS52	0	0	0	0	0	0	0	0	0	0	0	0	0	0	0	0	0	0	0	0	0	0	0	0	0	0	0	0	0	0	0	0	0	0	0	0	0	0	0	0	0	0	0	0	0	0	0	0	0
CandidatusFinniella	0	0	0	0	0	0	0	0	0	0	0	0	0	0	0	0	0	0	0	0.112889	0	0	0	0	0	0	0	0	0	0	0	0	0	0	0	0	0	0	0	0	0	0	0	0	0	0	0	0	0
Williamwhitmania	0	0	0	0	0	0	0	0	0	0	0	0	0	0	0	0	0	0	0	0	0	0	0	0	0	0	0	0	0	0	0	0	0	0	0	0	0	0.381853	0	0	0	0	0	0	0	0	0	0	0
Pla4lineage	0	0	0	0	0	0	0	0	0	0	0	0	0	0	0	0	0	0	0	0	0	0	0	0	0	0	0	0	0	0	0	0	0	0	0	0	0	0	0	0	0	0	0	0	0	0	0	0	0
Methanobacterium	0	0	0	0	0	0	0	0	0	0	0	0	0	0	0	0	0	0	0	0	0	0	0	0	0	0	0	0	0	0	0	0	0	0	0	0	0	0	0	0	0	0	0	0	0	0	0	0	0
Synechococcusspongiarumgroup	0	0	0	0	0	0	0	0	0	0	0	0	0	0	0	0	0	0	0	0	0	0	0	0	0	0	0	0	0	0	0	0	0	0	0	0	0	0	0	0	0	0	0	0	0	0	0	0	0
Ileibacterium	0	0	0	0	0	0	0	0	0	0	0	0	0	0	0	0	0	0	0	0	0	0	0	0	0	0	0	0	0	0	0	0	0	0	0	0	0	0	0	0	0	0	0	0	0	0	0	0	0
Arenibacter	0	0	0	0	0	0	0	0	0	0	0	0	0	0	0	0	0	0	0	0	0	0	0	0	0	0	0	0	0	0	0	0	0	0	0	0	0	0	0	0	0	0	0	0	0	0	0	0	0
Desemzia	0	0	0	0	0	0	0	0	0	0	0	0	0	0	0	0	0	0	0	0	0	0	0	0	0	0	0	0	0	0	0	0	0	0	0	0	0	0	0	0	0	0	0	0	0	0	0	0	0
Ketobacter	0	0	0	0	0	0	0	0	0	0	0	0	0	0	0	0	0	0	0	0	0	0	0	0	0	0	0	0	0	0	0	0	0	0	0	0	0	0	0	0	0	0	0	0	0	0	0	0	0
Thermaerobacter	0	0	0	0	0	0	0	0	0	0	0	0	0	0	0	0	0	0	0	0	0	0	0	0	0	0	0	0	0	0	0	0	0	0	0	0	0	0	0	0	0	0	0	0	0	0	0	0	0
Aliterella	0	0	0	0	0	0	0	0	0	0	0	0	0	0	0	0	0	0	0	0	0	0	0	0	0	0	0	0	0	0	0	0	0	0	0	0	0	0	0	0	0	0	0	0	0	0	0	0	0
Citrifermentans	0	0	0	0	0	0	0	0	0	0	0	0	0	0	0	0	0	0	0	0	0	0	0	0	0	0	0	0	0	0	0	0	0	0	0	0	0	0	0	0	0	0	0	0	0	0	0	0	0
Actinobacillus	0	0	0	0	0	0	0	0	0	0	0	0	0	0	0	0	0	0	0	0	0	0	0	0	0	0	0	0	0	0	0	0	0	0	0	0	0	0	0	0	0	0	0	0	0	0	0	0	0
Jeotgalibaca	0	0	0	0	0	0	0	0	0	0	0	0	0	0	0	0	0	0	0	0	0	0	0	0	0	0	0	0	0	0	0	0	0	0	0	0	0	0	0	0	0	0	0	0	0	0	0	0	0
Chthonomonadales	0	0	0	0	0	0	0	0	0	0	0	0	0	0	0	0	0	0	0	0	0	0	0	0	0	0	0	0	0	0	0	0	0	0	0	0.426218	0	0	0	0	0	0	0	0	0	0	0	0	0
Chryseolinea	0	0	0	0	0	0	0	0	0	0	0	0	0	0	0	0	0	0	0	0	0	0	0	0	0	0	0	0	0	0	0	0	0	0	0	0	0	0	0	0	0	0	0	0	0	0	0	0	0
Pirellula	0	0	0	0	0	0	0	0	0	0	0	0	0	0	0	0	0	0	0	0	0	0	0	0	0	0	0	0	0	0	0	0	0	0	0	0	0	0	0	0	0	0	0	0	0	0	0	0	0
Actinotignum	0	0	0	0	0	0	0	0	0	0	0	0	0	0	0	0	0	0	0	0	0	0	0	0	0	0	0	0	0	0	0	0	0	0	0	0	0	0	0	0	0	0	0	0	0	0	0	0	0
BD211terrestrialgroup	0	0	0	0	0	0	0	0	0	0	0	0	0	0	0	0	0	0	0	0	0	0	0	0	0	0	0	0	0	0	0	0	0	0	0	0	0	0	0	0	0	0	0	0	0	0	0	0	0
Parasegetibacter	0	0	0	0	0	0	0	0	0	0	0	0	0	0	0	0	0	0	0	0	0	0	0	0	0	0	0	0	0	0	0	0	0	0	0	0	0	0	0	0	0	0	0	0	0	0	0	0	0
Spongiibacter	0	0	0	0	0	0	0	0	0	0	0	0	0	0	0	0	0	0	0	0	0	0	0	0	0	0	0	0	0	0	0	0	0	0	0	0	0	0	0	0	0	0	0	0	0	0	0	0	0
F0058	0	0	0	0	0	0	0	0	0	0	0	0	0	0	0	0	0	0	0	0	0	0	0	0	0	0	0	0	0	0	0	0	0	0	0	0	0	0	0	0	0	0	0	0	0	0	0	0	0
RB41	0	0	0	0	0	0	0	0	0	0	0	0	0	0	0	0	0	0	0	0	0	0	0	0	0	0	0.369822	0	0	0	0	0	0	0	0	0	0	0	0	0	0	0	0	0	0	0	0	0	0
Mobiluncus	0	0	0	0	0	0	0	0	0	0	0	0	0	0	0	0	0	0	0	0	0	0	0	0	0	0	0	0	0	0	0	0	0	0	0	0	0	0	0	0	0	0	0	0	0	0	0	0	0
Antarcticibacterium	0	0	0	0	0	0	0	0	0	0	0	0	0	0	0	0	0	0	0	0	0	0	0	0	0	0	0	0	0	0	0	0	0	0	0	0	0	0	0	0	0	0	0	0	0	0	0	0	0
Gordonibacter	0	0	0	0	0	0	0	0	0	0	0	0	0	0	0	0	0	0	0	0	0	0	0	0	0	0	0	0	0	0	0	0	0	0	0	0	0	0	0	0	0	0	0	0	0	0	0	0	0
Eubacteriumeligensgroup	0	0	0	0	0	0	0	0	0	0	0	0	0	0	0	0	0	0	0	0	0	0	0	0	0	0	0	0	0	0	0	0	0	0	0	0	0	0	0	0	0	0	0	0	0	0	0	0	0
Enterobacteriaceae	0	0	0	0	0	0	0	0	0	0	0	0	0	0	0	0	0	0	0	0	0	0	0	0	0	0	0	0	0	0	0	0	0	0	0	0	0	0	0	0	0	0	0	0	0	0	0	0	0
Roseovarius	0	0	0	0	0	0	0	0	0	0	0	0	0	0	0	0	0	0	0	0	0	0	0	0	0	0	0	0	0	0	0	0	0	0	0	0	0	0	0	0	0	0	0	0	0	0	0	0	0
Corallococcus	0	0	0	0	0	0	0	0	0	0	0	0	0	0	0	0	0	0	0	0	0	0	0	0	0	0	0	0	0	0	0	0	0	0	0	0	0	0	0	0	0	0	0	0	0	0	0	0	0
Photobacterium	0	0	0	0	0	0	0	0	0	0	0	0	0	0	0	0	0	0	0	0	0	0	0	0	0	0	0	0	0	0	0	0	0	0	0	0	0	0	0	0	0	0	0	0	0	0	0	0	0
Puia	0	0	0	0	0	0	0	0	0	0	0	0	0	0	0	0	0	0	0	0	0	0	0	0	0	0	0	0	0	0	0	0	0	0	0	0	0	0	0	0	0	0	0	0	0	0	0	0	0
Butyricicoccus	0	0	0	0	0	0	0	0	0	0	0	0	0	0	0	0	0	0	0	0	0	0	0	0	0	0	0	0	0	0	0	0	0	0	0	0	0	0	0	0	0	0	0	0	0	0	0	0	0
Lacunisphaera	0	0	0	0	0	0	0	0	0	0	0	0	0	0	0	0	0	0	0	0	0	0	0	0	0	0	0	0	0	0	0	0	0	0	0	0	0	0	0	0	0	0	0	0	0	0	0	0	0
Gillisia	0	0	0	0	0	0	0	0	0	0	0	0	0	0	0	0	0	0	0	0	0	0	0	0	0	0	0	0	0	0	0	0	0	0	0	0	0	0	0	0	0	0	0	0	0	0	0	0	0
Domibacillus	0	0	0	0	0	0	0	0	0	0	0	0	0	0	0	0	0	0	0	0	0	0	0	0	0	0	0	0	0	0	0	0	0	0	0	0	0	0	0	0	0	0	0	0	0	0	0	0	0
TK10	0	0	0	0	0	0	0	0	0	0	0	0	0	0	0	0	0	0	0	0	0	0	0	0	0	0	0	0	0	0	0	0	0	0	0	0	0	0	0	0	0	0	0	0	0	0	0	0	0
Acetivibrio	0	0	0	0	0	0	0	0	0	0	0	0	0	0	0	0	0	0	0	0	0	0	0	0	0	0	0	0	0	0	0	0	0	0	0	0	0	0	0	0	0	0	0	0	0	0	0	0	0
Adlercreutzia	0	0	0	0	0	0	0	0	0	0	0	0	0	0	0	0	0	0	0	0	0	0	0	0	0	0	0	0	0	0	0	0	0	0	0	0	0	0	0	0	0	0	0	0	0	0	0	0	0
Phascolarctobacterium	0	0	0	0	0	0	0	0	0	0	0	0	0	0	0	0	0	0	0	0	0	0	0	0	0	0	0	0	0	0	0	0	0	0	0	0	0	0	0	0	0	0	0	0	0	0	0	0	0
PAUC26f	0	0	0	0	0	0	0	0	0	0	0	0	0	0	0	0	0	0	0	0	0	0	0	0	0	0	0	0	0	0	0	0	0	0	0	0	0	0	0	0	0	0	0	0	0	0	0	0	0
Pseudorhodoplanes	0	0	0	0	0	0	0	0	0	0	0	0	0	0	0	0	0	0	0	0	0	0	0	0	0	0	0	0	0	0	0	0	0	0	0	0	0	0	0	0	0	0	0	0	0	0	0	0	0
Tuzzerella	0	0	0	0	0	0	0	0	0	0	0	0	0	0	0	0	0	0	0	0	0	0	0	0	0	0	0	0	0	0	0	0	0	0	0	0	0	0	0	0	0	0	0	0	0	0	0	0	0
Raineya	0	0	0	0	0	0	0	0	0	0	0	0	0	0	0	0	0	0	0	0	0	0	0	0	0	0	0	0	0	0	0	0	0	0	0	0	0	0	0	0	0	0	0	0	0	0	0	0	0
Howardella	0	0	0	0	0	0	0	0	0	0	0	0	0	0	0	0	0	0	0	0	0	0	0	0	0	0	0	0	0	0	0	0	0	0	0	0	0	0	0	0	0	0	0	0	0	0	0	0	0
Leptospira	0	0	0	0	0	0	0	0	0	0	0	0	0	0	0	0	0	0	0	0	0	0	0	0	0	0	0	0	0	0	0	0	0	0	0	0	0	0	0	0	0	0	0	0	0	0	0	0	0
Taeseokella	0	0	0	0	0	0	0	0	0	0	0	0	0	0	0	0	0	0	0	0	0	0	0	0	0	0	0	0	0	0	0	0	0	0	0	0	0	0	0	0	0	0	0	0	0	0	0	0	0
Pannonibacter	0	0	0	0	0	0	0	0	0	0	0	0	0	0	0	0	0	0	0	0	0	0	0	0	0	0	0	0	0	0	0	0	0	0	0	0	0	0	0	0	0	0	0	0	0	0	0	0	0
Sporocytophaga	0	0	0	0	0	0	0	0	0	0	0	0	0	0	0	0	0	0	0	0	0	0	0	0	0	0	0	0	0	0	0	0	0	0	0	0	0	0	0	0	0	0	0	0	0	0	0	0	0
Thalassotalea	0	0	0	0	0	0	0	0	0	0	0	0	0	0	0	0	0	0	0	0	0	0	0	0	0	0	0	0	0	0	0	0	0	0	0	0	0	0	0	0	0	0	0	0	0	0	0	0	0
Oxobacter	0	0	0	0	0	0	0	0	0	0	0	0	0	0	0	0	0	0	0	0	0	0	0	0	0	0	0	0	0	0	0	0	0	0	0	0	0	0	0	0	0	0	0	0	0	0	0	0	0
Dehalobacter	0	0	0	0	0	0	0	0	0	0	0	0	0	0	0	0	0	0	0	0	0	0	0	0	0	0	0	0	0	0	0	0	0	0	0	0	0	0	0	0	0	0	0	0	0	0	0	0	0
PleurocapsaPCC7319	0	0	0	0	0	0	0	0	0	0	0	0	0	0	0	0	0	0	0	0	0	0	0	0	0	0	0	0	0	0	0	0	0	0	0	0	0	0	0	0	0	0	0	0	0	0	0	0	0
Conchiformibius	0	0	0	0	0	0	0	0	0	0	0	0	0	0	0	0	0	0	0	0	0	0	0	0	0	0	0	0	0	0	0	0	0	0	0	0	0	0	0	0	0	0	0	0	0	0	0	0	0
Albidovulum	0	0	0	0	0	0	0	0	0	0	0	0	0	0	0	0	0	0	0	0	0	0	0	0	0	0	0	0	0	0	0	0	0	0	0	0	0	0	0	0	0	0	0	0	0	0	0	0	0
Clostridiumsensustricto7	0	0	0	0	0	0	0	0	0	0	0	0	0	0	0	0	0	0	0	0	0	0	0	0	0	0	0	0	0	0	0	0	0	0	0	0	0	0	0	0	0	0	0	0	0	0	0	0	0
Cryptosporangium	0	0	0	0	0	0	0	0	0	0	0	0	0	0	0	0	0	0	0	0	0	0	0	0	0	0	0	0	0	0	0	0	0	0	0	0	0	0	0	0	0	0	0	0	0	0	0	0	0
Saccharimonadaceae	0	0	0	0	0	0	0	0	0	0	0	0	0	0	0	0	0	0	0	0	0	0	0	0	0	0	0	0	0	0	0	0	0	0	0	0	0	0	0	0	0	0	0	0	0	0	0	0	0
Saccharofermentans	0	0	0	0	0	0	0	0	0	0	0	0	0	0	0	0	0	0	0	0	0	0	0	0	0	0	0	0	0	0	0	0	0	0	0	0	0	0	0	0	0	0	0	0	0	0	0	0	0
NB1j	0	0	0	0	0	0	0	0	0	0	0	0	0	0	0	0	0	0	0	0	0	0	0	0	0	0	0	0	0	0	0	0	0	0	0	0	0	0	0	0	0	0	0	0	0	0	0	0	0
SM1A02	0	0	0	0	0	0	0	0	0	0	0	0	0	0	0	0	0	0	0	0	0	0	0	0	0	0	0	0	0	0	0	0	0	0	0	0	0	0	0	0	0	0	0	0	0	0	0	0	0
CandidatusPlanktoluna	0	0	0	0	0	0	0	0	0	0	0	0	0	0	0	0	0	0	0	0	0	0	0	0	0	0	0	0	0	0	0	0	0	0	0	0	0	0	0	0	0	0	0	0	0	0	0	0	0
CandidatusCampbellbacteria	0	0	0	0	0	0	0	0	0	0	0	0	0	0	0	0	0	0	0	0	0	0	0	0	0	0	0	0	0	0	0	0	0	0	0	0	0	0	0	0	0	0	0	0	0	0	0	0	0
Ruminococcustorquesgroup	0	0	0	0	0	0	0	0	0	0	0	0	0	0	0	0	0	0	0	0	0	0	0	0	0	0	0	0	0	0	0	0	0	0	0	0	0	0	0	0	0	0	0	0	0	0	0	0	0
Lutibacter	0	0	0	0	0	0	0	0	0	0	0	0	0	0	0	0	0	0	0	0	0	0	0	0	0	0	0	0	0	0	0	0	0	0	0	0	0	0	0	0	0	0	0	0	0	0	0	0	0
AKAU4049	0	0	0	0	0	0	0	0	0	0	0	0	0	0	0	0	0	0	0	0	0	0	0	0	0	0	0	0	0	0	0	0	0	0	0	0	0	0	0	0	0	0	0	0	0	0	0	0	0
CandidatusAlysiosphaera	0	0	0	0	0	0	0	0	0	0	0	0	0	0	0	0	0	0	0	0	0	0	0	0	0	0	0	0	0	0	0	0	0	0.466893	0	0	0	0	0	0	0	0	0	0	0	0	0	0	0
MM2	0	0	0	0	0	0	0	0	0	0	0	0	0	0	0	0	0	0	0	0	0	0	0	0	0	0	0	0	0	0	0	0	0	0	0	0	0	0	0	0	0	0	0	0	0	0	0	0	0
Nibribacter	0	0	0	0	0	0	0	0	0	0	0	0	0	0	0	0	0	0	0	0	0	0	0	0	0	0	0	0	0	0	0	0	0	0	0	0	0	0	0	0	0	0	0	0	0	0	0	0	0
CandidatusBerkiella	0	0	0	0	0	0	0	0	0	0	0	0	0	0.168339	0	0	0	0	0	0	0	0	0	0	0	0	0	0	0	0	0	0	0	0	0	0	0	0	0	0	0	0	0	0	0	0	0	0	0
Acidothermus	0	0	0	0	0	0	0	0	0	0	0	0	0	0	0	0	0	0	0	0	0	0	0	0	0	0	0	0	0	0	0	0	1.36171	0	0	0	0	0	0	0	0	0	0	0	0	0	0	0	0
Chlorobium	0	0	0	0	0	0	0	0	0	0	0	0	0	0	0	0	0	0	0	0	0	0	0	0	0	0	0	0	0	0	0	0	0	0	0	0	0	0	0	0	0	0	0	0	0	0	0	0	0
Lewinella	0	0	0	0	0	0	0	0	0	0	0	0	0	0	0	0	0	0	0	0	0	0	0	0	0	0	0	0	0	0	0	0	0	0	0	0	0	0	0	0	0	0	0	0	0	0	0	0	0
UCG010	0	0	0	0	0	0	0	0	0	0	0	0.131729	0	0	0	0	0	0	0	0	0	0	0	0	0	0	0	0	0	0	0	0	0	0	0	0	0	0	0	0	0	0	0	0	0	0	0	0	0
Eubacterium	0	0	0	0	0	0	0	0	0	0	0	0	0	0	0	0	0	0	0	0	0	0	0	0	0	0	0	0	0	0	0	0	0	0	0	0	0	0	0	0	0	0	0	0	0	0	0	0	0
Sumerlaea	0	0	0	0	0	0	0	0	0	0	0	0	0	0	0	0	0	0	0	0	0	0	0	0	0	0	0	0	0	0	0	0	0	0	0	0	0	0	0	0	0	0	0	0	0	0	0	0	0
CandidatusBacilloplasma	0	0	0	0	0	0	0	0	0	0	0	0	0	0	0	0	0	0	0	0	0	0	0	0	0	0	0	0	0	0	0	0	0	0	0	0	0	0	0	0	0	0	0	0	0	0	0	0	0
Brevibacillus	0	0	0	0	0	0	0	0	0	0	0	0	0	0	0	0	0	0	0	0	0	0	0	0	0	0	0	0	0	0	0	0	0	0	0	0	0	0	0	0	0	0	0	0	0	0	0	0	0
Anaerotruncus	0	0	0	0	0	0	0	0	0	0	0	0	0	0	0	0	0	0	0	0	0	0	0	0	0	0	0	0	0	0	0	0	0	0	0	0	0	0	0	0	0	0	0	0	0	0	0	0	0
Fimbriimonadaceae	0	0	0	0	0	0	0	0	0	0	0	0	0	0	0	0	0	0	0	0	0	0	0	0	0	0	0	0	0	0	0	0	0	0	0	0	0	0	0	0	0	0	0	0	0	0	0	0	0
Stella	0	0	0	0	0	0	0	0	0	0	0	0	0	0	0	0	0	0	0	0	0	0	0	0	0	0	0	0	0	0	0	0	0	0	0	0	0	0	0	0	0	0	0	0	0	0	0	0	0
Subtercola	0	0	0	0	0	0	0	0	0	0	0	0	0	0	0	0	0	0	0	0	0	0	0	0	0	0	0	0	0	0	0	0	0	0	0	0	0	0	0	0	0	0	0	0	0	0	0	0	0
Dinghuibacter	0	0	0	0	0	0	0	0	0	0	0	0	0	0	0	0	0	0	0	0	0	0	0	0	0	0	0	0	0	0	0	0	0	0	0	0	0	0	0	0	0	0	0	0	0	0	0	0	0
Euzebya	0	0	0	0	0	0	0	0	0	0	0	0	0	0	0	0	0	0	0	0	0	0	0	0	0	0	0	0	0	0	0	0	0	0	0	0	0	0	0	0	0	0	0	0	0	0	0	0	0
CandidatusUdaeobacter	0	0	0	0	0	0	0	0	0	0	0	0	0	0	0	0	0	0	0	0	0	0	0	0	0	0	0	0	0	0	0	0	0	0	0	0	0	0	0	0	0	0	0	0	0	0	0	0	0
OLB14	0	0	0	0	0	0	0	0	0	0	0	0	0	0	0	0	0	0	0	0	0	0	0	0	0	0	0	0	0	0	0	0	0	0	0	0	0	0	0	0	0	0	0	0	0	0	0	0	0
Terasakiella	0	0	0	0	0	0	0	0	0	0	0	0	0	0	0	0	0	0	0	0	0	0	0	0	0	0	0	0	0	0	0	0	0	0	0	0	0	0	0	0	0	0	0	0	0	0	0	0	0
Lutispora	0	0	0	0	0	0	0	0	0	0	0	0	0	0	0	0	0	0	0	0	0	0	0	0	0	0	0	0	0	0	0	0	0	0.645161	0	0	0	0	0	0	0	0	0	0	0	0	0	0	0
Solibacillus	0	0	0	0	0	0	0	0	0	0	0	0	0	0	0	0	0	0	0	0	0	0	0	0	0	0	0	0	0	0	0	0	0	0	0	0	0	0	0	0	0	0	0	0	0	0	0	0	0
Commensalibacter	0	0	0	0	0	0	0	0	0	0	0	0	0	0	0	0	0	0	0	0	0	0	0	0	0	0	0.279421	0	0	0	0	0	0	0	0	0	0	0	0	0	0	0	0	0	0	0	0	0	0
Defluviicoccus	0	0	0	0	0	0	0	0	0	0	0	0	0	0	0	0	0	0	0	0	0	0	0	0	0	0	0	0	0	0	0	0	0	0	0	0	0	0	0	0	0	0	0	0	0	0	0	0	0
Meiothermus	0	0	0	0	0	0	0	0	0	0	0	0	0	0	0	0	0	0	0	0	0	0	0	0	0	0	0	0	0	0	0	0	0	0	0	0	0	0	0	0	0	0	0	0	0	0	0	0	0
Egicoccus	0	0	0	0	0	0	0	0	0	0	0	0	0	0	0	0	0	0	0	0	0	0	0	0	0	0	0	0	0	0	0	0	0	0	0	0	0	0	0	0	0	0	0	0	0	0	0	0	0
UCG002	0	0	0	0	0	0	0	0	0	0	0	0	0	0	0	0	0	0	0	0	0	0	0	0	0	0	0	0	0	0	0	0	0	0	0	0	0	0	0	0	0	0	0	0	0	0	0	0	0
MVP15	0	0	0	0	0	0	0	0	0	0	0	0	0	0	0	0	0	0	0	0	0	0	0	0	0	0	0	0	0	0	0	0	0	0	0	0	0	0	0	0	0	0	0	0	0	0	0	0	0
SJA28	0	0	0	0	0	0	0	0	0	0	0	0	0	0	0	0	0	0	0	0	0	0	0	0	0	0	0	0	0	0	0	0	0.855718	0	0	0	0	0	0	0	0	0	0	0	0	0	0	0	0
Hydrogenedensaceae	0	0	0	0	0	0	0	0	0	0	0	0	0	0	0	0	0	0	0	0	0	0	0	0	0	0	0	0	0	0	0	0	0	0	0	0	0	0	0	0	0	0	0	0	0	0	0	0	0
SBR1031	0	0	0	0	0	0	0	0	0	0	0	0	0	0	0	0	0	0	0	0	0	0	0	0	0	0	0	0	0	0	0	0	0	0	0	0	0	0	0	0	0	0	0	0	0	0	0	0	0
ThioalkalispiraSulfurivermis	0	0	0	0	0	0	0	0	0	0	0	0	0	0	0	0	0	0	0	0	0	0	0	0	0	0	0	0	0	0	0	0	0	0	0	0	0	0	0	0	0	0	0	0	0	0	0	0	0
Acetitomaculum	0	0	0	0	0	0	0	0	0	0	0	0	0	0	0	0	0	0	0	0	0	0	0	0	0	0	0	0	0	0	0	0	0	0	0	0	0	0	0	0	0	0	0	0	0	0	0	0	0
Bauldia	0	0	0	0	0	0	0	0	0	0	0	0	0	0	0	0	0	0	0	0	0	0	0	0	0	0	0	0	0	0	0	0	0	0	0	0	0	0	0	0	0	0	0	0	0	0	0	0	0
Geothrix	0	0	0	0	0	0	0	0	0	0	0	0	0	0	0	0	0	0	0	0	0	0	0	0	0	0	0	0	0	0	0	0	0	0	0	0	0	0	0	0	0	0	0	0	0	0	0	0	0
Cedecea	0	0	0	0	0	0	0	0	0	0	0	0	0	0	0	0	0	0	0	0	0	0	0	0	0	0	0	0	0	0	0	0	0	0	0	0	0	0	0	0	0	0	0	0	0	0	0	0	0
Selenomonas	0	0	0	0	0	0	0	0	0	0	0	0	0	0	0	0	0	0	0	0	0	0	0	0	0	0	0	0	0	0	0	0	0	0	0	0	0	0	0	0	0	0	0	0	0	0	0	0	0
UBA10353marinegroup	0	0	0	0	0	0	0	0	0	0	0	0	0	0	0	0	0	0	0	0	0	0	0	0	0	0	0	0	0	0	0	0	0	0	0	0	0	0	0	0	0	0	0	0	0	0	0	0	0
Streptacidiphilus	0	0	0	0	0	0	0	0	0	0	0	0	0	0	0	0	0	0	0	0	0	0	0	0	0	0	0	0	0	0	0	0	0	0	0	0	0	0	0	0	0	0	0	0	0	0	0	0	0
A21b	0	0	0	0	0	0	0	0	0	0	0	0	0	0	0	0	0	0	0	0	0	0	0	0	0	0	0	0	0	0	0	0	0	0	0	0	0	0	0	0	0	0	0	0	0	0	0	0	0
Methylibium	0	0	0	0	0	0	0	0	0	0	0	0	0	0	0	0	0	0	0	0	0	0	0	0	0	0	0	0	0	0	0	0	0	0	0	0	0	0	0	0	0	0	0	0	0	0	0	0	0
DefluviitaleaceaeUCG011	0	0	0	0	0	0	0	0	0	0	0	0	0	0	0	0	0	0	0	0	0	0	0	0	0	0	0	0	0	0	0	0	0	0	0	0	0	0	0	0	0	0	0	0	0	0	0	0	0
Nocardia	0	0	0	0	0	0	0	0	0	0	0	0	0	0	0	0	0	0	0	0	0	0	0	0	0	0	0	0	0	0	0	0	0	0	0	0	0	0	0	0	0	0	0	0	0	0	0	0	0
Parafrigoribacterium	0	0	0	0	0	0	0	0	0	0	0	0	0	0	0	0	0	0	0	0	0	0	0	0	0	0	0	0	0	0	0	0	0	0	0	0	0	0	0	0	0	0	0	0	0	0	0	0	0
Anaerosporobacter	0	0	0	0	0	0	0	0	0	0	0	0	0	0	0	0	0	0	0	0	0	0	0	0	0	0	0	0	0	0	0	0	0	0	0	0	0	0	0	0	0	0	0	0	0	0	0	0	0
LachnospiraceaeXPB1014group	0	0	0	0	0	0	0	0	0	0	0	0	0	0	0	0	0	0	0	0	0	0	0	0	0	0	0	0	0	0	0	0	0	0	0	0	0	0	0	0	0	0	0	0	0	0	0	0	0
Caenimonas	0	0	0	0	0	0	0	0	0	0	0	0.0746465	0.173217	0	0	0	0	0	0.0339999	0	0	0	0	0	0	0	0	0	0	0	0	0	0	0	0	0	0	0	0	0	0	0	0	0	0	0	0	0	0
Dadabacteriales	0	0	0	0	0	0	0	0	0	0	0	0	0	0	0	0	0	0	0	0	0	0	0	0	0	0	0	0	0	0	0	0	0	0	0	0	0	0	0	0	0	0	0	0	0	0	0	0	0
Maribacter	0	0	0	0	0	0	0	0	0	0	0	0	0	0	0	0	0	0	0	0	0	0	0	0	0	0	0	0	0	0	0	0	0	0	0	0	0	0	0	0	0	0	0	0	0	0	0	0	0
Clostridiumsensustricto3	0	0	0	0	0	0	0	0	0	0	0	0	0	0	0	0	0	0	0	0.415034	0	0	0	0	0	0	0	0	0	0	0	0	0	0	0	0	0	0	0	0	0	0	0	0	0	0	0	0	0
Dorea	0	0	0	0	0	0	0	0	0	0	0	0	0	0	0	0	0	0	0	0	0	0	0	0	0	0	0	0	0	0	0	0	0	0	0	0	0	0	0	0	0	0	0	0	0	0	0	0	0
LCP80	0	0	0	0	0	0	0	0	0	0	0	0	0	0	0	0	0	0	0	0	0	0	0	0	0	0	0	0	0	0	0	0	0	0	0	0	0	0	0	0	0	0	0	0	0	0	0	0	0
Bathyarchaeia	0	0	0	0	0	0	0	0	0	0	0	0	0	0	0	0	0	0	0	0	0	0	0	0	0	0	0	0	0	0	0	0	0	0	0	0	0	0	0	0	0	0	0	0	0	0	0	0	0
Methanobrevibacter	0	0	0	0	0	0	0	0	0	0	0	0	0	0	0	0	0	0	0	0	0	0	0	0	0	0	0	0	0	0	0	0	0	0	0	0	0	0	0	0	0	0	0	0	0	0	0	0	0
Hydrogenophilus	0	0	0	0	0	0	0	0	0	0	0	0	0	0	0	0	0	0	0	0	0	0	0	0	0	0	0	0	0	0	0	0	0	0	0	0	0	0	0	0	0	0	0	0	0	0	0	0	0
Streptomonospora	0	0	0	0	0	0	0	0	0	0	0	0	0	0	0	0	0	0	0	0	0	0	0	0	0	0	0	0	0	0	0	0	0	0	0	0	0	0	0	0	0	0	0	0	0	0	0	0	0
Spiroplasma	0	0	0	0	0	0	0	0	0	0	0	0	0	0	0	0	0	0	0	0	0	0	0	0	0	0	0	0	0	0	0	0	0	0	0	0	0	0	0	0	0	0	0	0	0	0	0	0	0
Raoultibacter	0	0	0	0	0	0	0	0	0	0	0	0	0	0	0	0	0	0	0	0	0	0	0	0	0	0	0	0	0	0	0	0	0	0	0	0	0	0	0	0	0	0	0	0	0	0	0	0	0
Epulopiscium	0	0	0	0	0	0	0	0	0.168195	0	0	0	0	0	0	0	0	0	0	0	0	0	0	0	0	0	0	0	0	0	0	0	0	0	0	0	0	0	0	0	0	0	0	0	0	0	0	0	0
Buttiauxella	0	0	0	0	0	0	0	0	0	0	0	0	0	0	0	0	0	0	0	0	0	0	0	0	0	0	0	0	0	0	0	0	0	0	0	0	0	0	0	0	0	0	0	0	0	0	0	0	0
EPR3968O8aBc78	0	0	0	0	0	0	0	0	0	0	0	0	0	0	0	0	0	0	0	0	0	0	0	0	0	0	0	0	0	0	0	0	0	0	0	0	0	0	0	0	0	0	0	0	0	0	0	0	0
Dyella	0	0	0	0	0	0	0	0	0	0	0	0	0	0	0	0	0	0	0	0	0	0	0	0	0	0	0	0	0	0	0	0	0	0	0	0	0	0	0	0	0	0	0	0	0	0	0	0	0
LineageIIc	0	0	0	0	0	0	0	0	0	0	0	0	0	0	0	0	0	0	0	0	0	0	0	0	0	0	0	0	0	0	0	0	0	0	0	0	0	0	0	0	0	0	0	0	0	0	0	0	0
FFCH7168	0	0	0	0	0	0	0	0	0	0	0	0	0	0	0	0	0	0	0	0	0	0	0	0	0	0	0	0	0	0	0	0	0	0	0	0	0	0	0	0	0	0	0	0	0	0	0	0	0
Vampirovibrionaceae	0	0	0	0	0	0	0	0	0	0	0	0	0	0	0	0	0	0	0	0	0	0	0	0	0	0	0	0	0	0	0	0	0	0	0	0	0	0	0	0	0	0	0	0	0	0	0	0	0
Oceanobacillus	0	0	0	0	0	0	0	0	0	0	0	0	0	0	0	0	0	0	0	0	0	0	0	0	0	0	0	0	0	0	0	0	0	0	0	0	0	0	0	0	0	0	0	0	0	0	0	0	0
BRHc20a	0	0	0	0	0	0	0	0	0	0	0	0	0	0	0	0	0	0	0	0	0	0	0	0	0	0	0	0	0	0	0	0	0	0	0	0	0	0	0	0	0	0	0	0	0	0	0	0	0
Dojkabacteria	0	0	0	0	0	0	0	0	0	0	0	0	0	0	0	0	0	0	0	0	0	0	0	0	0	0	0	0	0	0	0	0	0	0	0	0	0	0	0	0	0	0	0	0	0	0	0	0	0
Clostridiumsensustricto18	0	0	0	0	0	0	0	0	0.168195	0	0	0	0	0	0	0	0	0	0	0	0	0	0	0	0	0	0	0	0	0	0	0	0	0	0	0	0	0	0	0	0	0	0	0	0	0	0	0	0
JSC12	0	0	0	0	0	0	0	0	0	0	0	0	0	0	0	0	0	0	0	0	0	0	0	0	0	0	0	0	0	0	0	0	0	0	0	0	0	0	0	0	0	0	0	0	0	0	0	0	0
Desulfovirga	0	0	0	0	0	0	0	0	0	0	0	0	0	0	0	0	0	0	0	0	0	0	0	0	0	0	0	0	0	0	0	0	0	0	0	0	0	0	0	0	0	0	0	0	0	0	0	0	0
NKB15	0	0	0	0	0	0	0	0	0	0	0	0	0	0	0	0	0	0	0	0	0	0	0	0	0	0	0	0	0	0	0	0	0	0	0	0	0	0	0	0	0	0	0	0	0	0	0	0	0
CandidatusXiphinematobacter	0	0	0	0	0	0	0	0	0	0	0	0	0	0	0	0	0	0	0	0	0	0	0	0	0	0	0	0	0	0	0	0	0	0	0	0	0	0	0	0	0	0	0	0	0	0	0	0	0
Syntrophobacter	0	0	0	0	0	0	0	0	0	0	0	0	0	0	0	0	0	0	0	0	0	0	0	0	0	0	0	0	0	0	0	0	0	0	0	0	0	0	0	0	0	0	0	0	0	0	0	0	0
Subgroup7	0	0	0	0	0	0	0	0	0	0	0	0	0	0	0	0	0	0	0	0	0	0	0	0	0	0	0	0	0	0	0	0	0	0	0	0	0	0	0	0	0	0	0	0	0	0	0	0	0
Brumimicrobium	0	0	0	0	0	0	0	0	0	0	0	0	0	0	0	0	0	0	0	0	0	0	0	0	0	0	0	0	0	0	0	0	0	0	0	0	0	0	0	0	0	0	0	0	0	0	0	0	0
NodosilineaPCC7104	0	0	0	0	0	0	0	0	0	0	0	0	0	0	0	0	0	0	0	0	0	0	0	0	0	0	0	0	0	0	0	0	0	0	0	0	0	0	0	0	0	0	0	0	0	0	0	0	0
CandidatusRhabdochlamydia	0	0	0	0	0	0	0	0	0	0	0	0	0	0	0	0	0	0	0	0	0	0	0	0	0	0	0	0	0	0	0	0	0	0	0	0	0	0	0	0	0	0	0	0	0	0	0	0	0
Kosakonia	0	0	0	0	0	0	0	0	0	0	0	0	0	0	0	0	0	0	0	0	0	0	0	0	0	0	0	0	0	0	0	0	0	0	0	0	0	0	0	0	0	0	0	0	0	0	0	0	0
Clavibacter	0	0	0	0	0	0	0	0	0	0	0	0	0	0	0	0	0	0	0	0	0	0	0	0	0	0	0	0	0	0	0	0	0	0	0	0	0	0	0	0	0	0	0	0	0	0	0	0	0
Fervidobacterium	0	0	0	0	0	0	0	0	0	0	0	0	0	0	0	0	0	0	0	0	0	0	0	0	0	0	0	0	0	0	0	0	0	0	0	0	0	0	0	0	0	0	0	0	0	0	0	0	0
Odoribacter	0	0	0	0	0	0	0	0	0	0	0	0	0	0	0	0	0	0	0	0	0	0	0	0	0	0	0	0	0	0	0	0	0	0	0	0	0	0	0	0	0	0	0	0	0	0	0	0	0
MidBa8	0	0	0	0	0	0	0	0	0	0	0	0	0	0	0	0	0	0	0	0	0	0	0	0	0	0	0	0	0	0	0	0	0	0	0	0	0	0	0	0	0	0	0	0	0	0	0	0	0
DEV007	0	0	0	0	0	0	0	0	0	0	0	0	0	0	0	0	0	0	0	0	0	0	0	0	0	0	0	0	0	0	0	0	0	0	0	0	0	0	0	0	0	0	0	0	0	0	0	0	0
SCGCAAA011D5	0	0	0	0	0	0	0	0	0	0	0	0	0	0	0	0	0	0	0	0	0	0	0	0	0	0	0	0	0	0	0	0	0	0	0	0	0	0	0	0	0	0	0	0	0	0	0	0	0
Nitrosopumilaceae	0	0	0	0	0	0	0	0	0	0	0	0	0	0	0	0	0	0	0	0	0	0	0	0	0	0	0	0	0	0	0	0	0	0	0	0	0	0	0	0	0	0	0	0	0	0	0	0	0
CandidatusNomurabacteria	0	0	0	0	0	0	0	0	0	0	0	0	0	0	0	0	0	0	0	0	0	0	0	0	0	0	0	0	0	0	0	0	0	0	0	0	0	0	0	0	0	0	0	0	0	0	0	0	0
Catonella	0	0	0	0	0	0	0	0	0	0	0	0	0	0	0	0	0	0	0	0	0	0	0	0	0	0	0	0	0	0	0	0	0	0	0	0	0	0	0	0	0	0	0	0	0	0	0	0	0
TK17	0	0	0	0	0	0	0	0	0	0	0	0	0	0	0	0	0	0	0	0	0	0	0	0	0	0	0	0	0	0	0	0	0	0	0	0	0	0	0	0	0	0	0	0	0	0	0	0	0
JTB23	0	0	0	0	0	0	0	0	0	0	0	0	0	0	0	0	0	0	0	0	0	0	0	0	0	0	0	0	0	0	0	0	0	0	0	0	0	0	0	0	0	0	0	0	0	0	0	0	0
120	0	0	0	0	0	0	0	0	0	0	0	0	0	0	0	0	0	0	0	0	0	0	0	0	0	0	0	0	0	0	0	0	0	0	0	0	0	0	0	0	0	0	0	0	0	0	0	0	0
CandidatusAzambacteria	0	0	0	0	0	0	0	0	0	0	0	0	0	0	0	0	0	0	0	0	0	0	0	0	0	0	0	0	0	0	0	0	0	0	0	0	0	0	0	0	0	0	0	0	0	0	0	0	0
Breznakia	0	0	0	0	0	0	0	0	0	0	0	0	0	0	0	0	0	0	0	0	0	0	0	0	0	0	0	0	0	0	0	0	0	0	0	0	0	0	0	0	0	0	0	0	0	0	0	0	0
Parasutterella	0	0	0	0	0	0	0	0	0	0	0	0	0	0	0	0	0	0	0	0	0	0	0	0	0	0	0	0	0	0	0	0	0	0	0	0	0	0	0	0	0	0	0	0	0	0	0	0	0
DEV008	0	0	0	0	0	0	0	0	0	0	0	0	0	0	0	0	0	0	0	0	0	0	0	0	0	0	0	0	0	0	0	0	0	0	0	0	0	0	0	0	0	0	0	0	0	0	0	0	0
Eubacteriumbrachygroup	0	0	0	0	0	0	0	0	0	0	0	0	0	0	0	0	0	0	0	0	0	0	0	0	0	0	0	0	0	0	0	0.61503	0	0	0	0	0	0	0	0	0	0	0	0	0	0	0	0	0
CandidatusAquiluna	0	0	0	0	0	0	0	0	0	0	0	0	0	0	0	0	0	0	0	0	0	0	0	0	0	0	0	0	0	0	0	0	0	0	0	0	0	0	0	0	0	0	0	0	0	0	0	0	0
Segetibacter	0	0	0	0	0	0	0	0	0	0	0	0	0	0	0	0	0	0	0	0	0	0	0	0	0	0	0	0	0	0	0	0	1.00454	0	0	0	0	0	0	0	0	0	0	0	0	0	0	0	0
Ahniella	0	0	0	0	0	0	0	0	0	0	0	0	0	0	0	0	0	0	0	0	0	0	0	0	0	0	0	0	0	0	0	0	0	0	0	0	0	0	0	0	0	0	0	0	0	0	0	0	0
Lysinimicrobium	0	0	0	0	0	0	0	0	0	0	0	0	0	0	0	0	0	0	0	0	0	0	0	0	0	0	0	0	0	0	0	0	0	0	0	0	0	0	0	0	0	0	0	0	0	0	0	0	0
Parvimonas	0	0	0	0	0	0	0	0	0	0	0	0	0	0	0	0	0	0	0	0	0	0	0	0	0	0	0	0	0	0	0	0	0	0	0	0	0	0	0	0	0	0	0	0	0	0	0	0	0
CandidatusMicrothrix	0	0	0	0	0	0	0	0	0	0	0	0	0	0	0	0	0	0	0	0	0	0	0	0	0	0	0	0	0	0	0	0	0	0	0	0	0	0	0	0	0	0	0	0	0	0	0	0	0
CandidatusAbawacabacteria	0	0	0	0	0	0	0	0	0	0	0	0	0	0	0	0	0	0	0	0	0	0	0	0	0	0	0	0	0	0	0	0	0	0	0	0	0	0	0	0	0	0	0	0	0	0	0	0	0
Alishewanella	0	0	0	0	0	0	0	0	0	0	0	0	0	0	0	0	0	0	0	0	0	0	0	0	0	0	0	0	0	0	0	0	0	0	0	0	0	0	0	0	0	0	0	0	0	0	0	0	0
MWHUniP1aquaticgroup	0	0	0	0	0	0	0	0	0	0	0	0	0	0	0	0	0	0	0	0	0	0	0	0	0	0	0	0	0	0	0	0	0	0	0	0	0	0	0	0	0	0	0	0	0	0	0	0	0
Clostridiumsensustricto12	0	0	0	0	0	0	0	0	0	0	0	0	0	0	0	0	0	0	0	0	0	0	0	0	0	0	0	0	0	0	0	0	0	0	0	0	0	0	0	0	0	0	0	0	0	0	0	0	0
Tepidimicrobium	0	0	0	0	0	0	0	0	0	0	0	0	0	0	0	0	0	0	0	0	0	0	0	0	0	0	0	0	0	0	0	0	0	0	0	0	0	0	0	0	0	0	0	0	0	0	0	0	0
LachnospiraceaeAC2044group	0	0	0	0	0	0	0	0	0	0	0	0	0	0	0	0	0	0	0	0	0	0	0	0	0	0	0	0	0	0	0	0	0	0	0	0	0	0	0	0	0	0	0	0	0	0	0	0	0
Tessaracoccus	0	0	0	0	0	0	0	0	0	0	0	0	0	0	0	0	0	0	0	0	0	0	0	0	0	0	0	0	0	0	0	0	0	0	0	0	0	0	0	0	0	0	0	0	0	0	0	0	0
Psychrobacillus	0	0	0	0	0	0	0	0	0	0	0	0	0	0	0	0	0	0	0	0	0	0	0	0	0	0	0	0	0	0	0	0	0	0	0	0	0	0	0	0	0	0	0	0	0	0	0	0	0
Marinococcus	0	0	0	0	0	0	0	0	0	0	0	0	0	0	0	0	0	0	0	0	0	0	0	0	0	0	0	0	0	0	0	0	0	0	0	0	0	0	0	0	0	0	0	0	0	0	0	0	0
Viridibacillus	0	0	0	0	0	0	0	0	0	0	0	0	0	0	0	0	0	0	0	0	0	0	0	0	0	0	0	0	0	0	0	0	0	0	0	0	0	0	0	0	0	0	0	0	0	0	0	0	0
Aliivibrio	0	0	0	0	0	0	0	0	0	0	0	0	0	0	0	0	0	0	0	0	0	0	0	0	0	0	0	0	0	0	0	0	0	0	0	0	0	0	0	0	0	0	0	0	0	0	0	0	0
CandidatusVogelbacteria	0	0	0	0	0	0	0	0	0	0	0	0	0	0	0	0	0	0	0	0	0	0	0	0	0	0	0	0	0	0	0	0	0	0	0	0	0	0	0	0	0	0	0	0	0	0	0	0	0
Arcanobacterium	0	0	0	0	0	0	0	0	0	0	0	0	0	0	0	0	0	0	0	0	0	0	0	0	0	0	0	0	0	0	0	0	0	0	0	0	0	0	0	0	0	0	0	0	0	0	0	0	0
CandidatusNitrotoga	0	0	0	0	0	0	0	0	0	0	0	0	0	0	0	0	0	0	0	0	0	0	0	0	0	0	0	0	0	0	0	0	0	0	0	0	0	0	0	0	0	0	0	0	0	0	0	0	0
CENA359	0	0	0	0	0	0	0	0	0	0	0	0	0	0	0	0	0	0	0	0	0	0	0	0	0	0	0	0	0	0	0	0	0	0	0	0	0	0	0	0	0	0	0	0	0	0	0	0	0
NRL2	0	0	0	0	0	0	0	0	0	0	0	0	0	0	0	0	0	0	0	0	0	0	0	0	0	0	0	0	0	0	0	0	0	0	0	0	0	0	0	0	0	0	0	0	0	0	0	0	0
LineageIIa	0	0	0	0	0	0	0	0	0	0	0	0	0	0	0	0	0	0	0	0	0	0	0	0	0	0	0	0	0	0	0	0	0	0	0	0	0	0	0	0	0	0	0	0	0	0	0	0	0
Shuttleworthia	0	0	0	0	0	0	0	0	0	0	0	0	0	0	0	0	0	0	0	0	0	0	0	0	0	0	0	0	0	0	0	0	0	0	0	0	0	0	0	0	0	0	0	0	0	0	0	0	0
Eisenibacter	0	0	0	0	0	0	0	0	0	0	0	0	0	0	0	0	0	0	0	0	0	0	0	0	0	0	0	0	0	0	0	0	0	0	0	0	0	0	0	0	0	0	0	0	0	0	0	0	0
Kurthia	0	0	0	0	0	0	0	0	0	0	0	0	0	0	0	0	0	0	0	0	0	0	0	0	0	0	0	0	0	0	0	0	0	0	0	0	0	0	0	0	0	0	0	0	0	0	0	0	0
Clostridiumsensustricto5	0	0	0	0	0	0	0	0	0	0	0	0	0	0	0	0	0	0	0	0	0	0	0	0	0	0	0	0	0	0	0	0	0.509711	0	0	0	0	0	0	0	0	0	0	0	0	0	0	0	0
Cardiobacterium	0	0	0	0	0	0	0	0	0	0	0	0	0	0	0	0	0	0	0	0	0	0	0	0	0	0	0	0	0	0	0	0	0	0	0	0	0	0	0	0	0	0	0	0.351048	0	0	0	0	0
Macrococcus	0	0	0	0	0	0	0	0	0	0	0	0	0	0	0	0	0	0	0	0	0	0	0	0	0	0	0	0	0	0	0	0	0	0	0	0	0	0	1.27512	0	0	0	0	0	0	0	0	0	0
Nitrosarchaeum	0	0	0	0	0	0	0	0	0	0	0	0	0	0	0	0	0	0	0	0	0	0	0	0	0	0	0	0	0	0	0	0	0	0	0	0	0	0	0	0	0	0	0	0	0	0	0	0	0
Anaeromyxobacter	0	0	0	0	0	0	0	0	0	0	0	0	0	0	0	0	0	0	0	0	0	0	0	0	0	0	0	0	0	0	0	0	0	0	0	0	0	0	0	0	0	0	0	0	0	0	0	0	0
Cereibacter	0	0	0	0	0	0	0	0	0	0	0	0	0	0	0	0	0	0	0	0	0	0	0	0	0	0	0	0	0	0	0	0	0	0	0	0	0	0	0	0	0	0	0	0	0	0	0	0	0
RBG13549	0	0	0	0	0	0	0	0	0	0	0	0	0	0	0	0	0	0	0	0	0	0	0	0	0	0	0	0	0	0	0	0	0	0	0	0	0	0	0	0	0	0	0	0	0	0	0	0	0
Anseongella	0	0	0	0	0	0	0	0	0	0	0	0	0	0	0	0	0	0	0	0	0	0	0	0	0	0	0	0	0	0	0	0	0	0	0	0	0	0	0	0	0	0	0	0	0	0	0	0	0
CHABXI27	0	0	0	0	0.115747	0	0	0	0	0.129574	0	0	0	0	0	0	0	0	0.247272	0	0	0	0	0	0	0	0	0	0	0	0	0	0	0	0	0	0	0	0	0	0	0	0	0	0	0	0	0	0
Smithella	0	0	0	0	0	0	0	0	0	0	0	0	0	0	0	0	0	0	0	0	0	0	0	0	0	0	0	0	0	0	0	0	0	0	0	0	0	0	0	0	0	0	0	0	0	0	0	0	0
Longimicrobium	0	0	0	0	0	0	0	0	0	0	0	0	0	0	0	0	0	0	0	0	0	0	0	0	0	0	0	0	0	0	0	0	0	0	0	0	0	0	0	0	0	0	0	0	0	0	0	0	0
CalothrixPCC6303	0	0	0	0	0	0	0	0	0	0	0	0	0	0	0	0	0	0	0	0	0	0	0	0	0	0	0	0	0	0	0	0	0	0	0	0	0	0	0	0	0	0	0	0	0	0	0.354223	0	0
OM190	0	0	0	0	0	0	0	0	0	0	0	0	0	0	0	0	0	0	0	0	0	0	0	0	0	0	0	0	0	0	0	0	0	0	0	0.129459	0	0	0	0	0	0	0	0	0	0	0	0	0
Herpetosiphon	0	0	0	0	0	0	0	0	0	0	0	0	0	0	0	0	0	0	0	0	0	0	0	0	0	0	0	0	0	0	0	0	0	0	0	0	0	0	0	0	0	0	0	0	0	0	0	0	0
Psychromonas	0	0	0	0	0	0	0	0	0	0	0	0	0	0	0	0	0	0	0	0	0	0	0	0	0	0	0	0	0	0	0	0	0	0	0	0	0	0	0	0	0	0	0	0	0	0	0	0	0
Oribacterium	0	0	0	0	0	0	0	0	0	0	0	0	0	0	0	0	0	0	0.160727	0	0	0	0	0	0	0	0	0	0	0	0	0	0	0	0	0	0	0	0	0	0	0	0	0	0	0	0	0	0
Beggiatoa	0	0	0	0	0	0	0	0	0	0	0	0	0	0	0	0	0	0	0	0	0	0	0	0	0	0	0	0	0	0	0	0	0	0	0	0	0	0	0	0.388053	0	0	0	0	0	0	0	0	0
CandidatusLiptonbacteria	0	0	0	0	0	0	0	0	0	0	0	0	0	0	0	0	0	0	0	0	0	0	0	0	0	0	0	0	0	0	0	0	0	0	0	0	0	0	0	0	0	0	0	0	0	0	0	0	0
RF39	0	0	0	0	0	0	0	0	0	0	0	0	0	0	0	0	0	0	0	0	0	0	0	0	0	0	0	0	0	0	0	0	0	0	0	0	0	0	0	0	0	0	0	0	0	0	0	0	0
Sedimentibacter	0	0	0	0	0	0	0	0	0	0	0	0	0	0	0	0	0	0	0	0.0763663	0	0	0	0	0	0	0	0	0	0	0	0	0	0	0	0	0	0	0	0	0	0	0	0	0	0	0	0	0
Mumia	0	0	0	0	0	0	0.0652742	0	0	0	0	0	0	0	0	0	0	0	0	0	0	0	0	0	0	0	0	0	0	0	0	0	0	0	0	0	0	0	0	0	0	0	0	0	0	0	0	0	0
[truncated: 451 more columns]

## Sheet: Sheet2
Phyla	AUT Austria_1	AUT Austria_2	AUT Austria_3	AUT Austria_4	AUT Austria_5	AUT Austria_6	AUT Austria_7	AUT Austria_8	AUT Austria_9	AUT Austria_10	AUT Austria_11	AUT Austria_12	AUT Austria_13	AUT Austria_14	AUT Austria_15	AUT Austria_16	AUT Austria_17	AUT Austria_18	AUT Austria_19	AUT Austria_20	AUT Austria_21	AUT Austria_22	AUT Austria_23	AUT Austria_24	AUT Austria_25	AUT Austria_26	AUT Austria_27	AUT Austria_28	Spain_395	Spain_396	Spain_397	Spain_398	Spain_399	Spain_400	Spain_401	Spain_402	Spain_403	Spain_404	Spain_405	Spain_406	Spain_407	Spain_408	Spain_409	Spain_410	Spain_411	Spain_412	Spain_413	Spain_414	Spain_415
Proteobacteria	58.6493	62.8431	58.9273	74.0769	64.9036	57.7903	63.9861	67.4641	68.9056	63.5275	85.6456	53.0342	62.5732	65.5163	66.3824	60.8464	62.1951	62.1516	60.7239	65.1305	61.1995	61.2701	63.9707	61.4611	69.9685	65.0806	64.5217	71.491	92.652	94.4568	100	76.7349	98.8449	99.5471	97.792	79.6718	87.1455	94.4828	96.7045	77.5468	95.1713	100	97.4956	98.4394	97.0265	97.8655	99.4248	99.827	97.281
Bacteroidota	38.8436	35.57	37.631	24.2505	28.1516	38.2284	33.0679	29.6035	28.3218	33.2487	9.85491	36.186	32.6723	30.5018	27.2746	35.4537	34.8328	35.2733	29.1287	29.6036	34.8552	30.9311	34.0871	35.2087	26.9775	33.8415	30.7281	26.5474	0.31094	2.9361	0	6.92399	0	0.275672	0	4.0082	1.58109	0.875332	2.11421	7.1094	1.34448	0	0	0	1.92678	0.818438	0	0.173049	0.524294
Actinobacteriota	0.43128	0.18109	0.684002	0.665188	2.50616	0	1.25326	0	0	0.321343	0	5.40968	1.7262	1.02946	3.82656	0.634819	0	0	3.85436	0.292184	0	0.499465	0.131357	0.441176	0	0	0.657462	0	2.33205	0.657949	0	4.9744	0	0	1.08025	7.84061	4.75832	1.36605	0.481529	6.30228	0.885391	0	0	0.54992	0.645732	0.360113	0	0	0.0365787
Firmicutes	0.417062	0.710065	0	0.289212	3.26103	1.75644	0.565709	0.557996	0.75959	0	0.709162	1.48854	1.25433	0	0.447125	1.4043	0.726862	0.272213	2.50054	3.76187	0.0556793	3.14663	0.225183	0.502846	0.121585	0	0	1.32284	2.93757	0.96225	0	7.65262	0.798722	0	0.830959	3.04131	2.24866	3.27586	0.376194	5.71679	2.59879	0	0.138109	1.01066	0.322866	0.955935	0.575235	0	2.15814
Cyanobacteria	0	0	0	0	0	0	0	0	0	0	0.126345	1.01431	0	0	0	0	0	0	0.111273	0	0	0	0	0	0	0	0	0	0	0	0	2.50098	0	0	0.296771	0.240258	0	0	0	0.43911	0	0	2.36626	0	0	0	0	0	0
Patescibacteria	0	0	0	0	0	0	0	0	0	0	0.22416	0	0	0	0	0	0	0	0	0	0	0	0	0	0	0	0	0	0.752803	0	0	0	0	0	0	0.287137	0.461778	0	0	0.56457	0	0	0	0	0	0	0	0	0
Bdellovibrionota	0	0	0	0	0	0	0	0	0	0	0.452396	0	0	0	0	0	0	0	0	0	0	0	0	0	0	0	0	0	0	0	0	0	0	0	0	0.421916	0.868343	0	0	0.75276	0	0	0	0	0	0	0	0	0
Myxococcota	0.113744	0	0.684002	0.216909	0	0	0.221932	0.967589	0.282133	0.678968	0	0	0.376299	0.647459	0	0.320616	0.371507	0.234103	0	0	3.19758	3.29647	1.58566	2.14896	2.93234	1.07788	3.36949	0	0	0	0	0	0	0	0	0.732493	0.923556	0	0	0	0	0	0	0	0	0	0	0	0
Chloroflexi	0	0	0	0	0	0	0	0	0	0	0	0	0	0	0	0	0	0	0	0	0	0	0	0	0	0	0	0	0	0	0	0	0	0	0	0.644594	0	0	0	0	0	0	0	0	0	0	0	0	0
Acidobacteriota	0.71564	0	1.41686	0	0.694479	0.888552	0.130548	0.700463	0.786718	1.25428	0	0	0.197109	1.37909	0	0.545046	0.94492	1.17051	0	0	0	0.249732	0	0	0	0	0.369822	0	1.01465	0	0	0	0.356353	0	0	2.21506	1.46062	0	0	0	0	0	0	0	0.0781128	0	0	0	0
Unassigned	0	0.0428898	0	0	0	0	0.117493	0.0712335	0	0	2.62879	0.149293	0	0.0971188	2.06925	0	0	0	0.154545	0	0	0	0	0	0	0	0	0	0	0	0	0.783773	0	0	0	0	0	0	0	0.715122	0	0	0	0	0	0	0	0	0
Dependentiae	0.123223	0.519443	0	0.23619	0	0.675024	0.339426	0	0.24958	0.373173	0.358657	2.34478	0.824274	0.220136	0	0.436037	0.468422	0.506315	3.04763	0.222458	0	0	0	0	0	0	0	0	0	0	0	0	0	0	0	0	0	0	0	0	0	0	0	0	0	0	0	0	0
Gemmatimonadota	0.478673	0	0.200858	0.265111	0.221428	0.185976	0	0.249317	0.51001	0.212501	0	0	0.376299	0.233085	0	0	0.209982	0	0.398727	0	0	0	0	0	0	0	0	0	0	0	0	0	0	0	0	0.544975	0	0	0	0	0	0	0	0	0	0	0	0	0
Verrucomicrobiota	0.227488	0.133435	0.456001	0	0.261688	0.475272	0.317668	0.385848	0.184472	0.383539	0	0	0	0.375526	0	0.359089	0.250363	0.391986	0	0	0	0	0	0	0	0	0	0	0	0	0	0	0	0	0	0	0	0	0	0	0	0	0	0	0	0	0	0	0
Campilobacterota	0	0	0	0	0	0	0	0	0	0	0	0	0	0	0	0	0	0	0	0	0	0	0	0	0	0	0	0	0	0	0	0	0	0	0	0	0	0	0	0.853128	0	0	0	0	0	0	0	0	0
Spirochaetota	0	0	0	0	0	0	0	0	0	0	0	0	0	0	0	0	0	0	0	0	0	0	0	0	0	0	0	0	0	0	0	0	0	0	0	0	0	0	0	0	0	0	0	0	0	0	0	0	0
Fusobacteriota	0	0	0	0	0	0	0	0	0	0	0	0	0	0	0	0	0	0	0	0	0	0	0	0	0	0	0	0	0	0	0	0	0	0	0	0	0	0	0	0	0	0	0	0	0	0	0	0	0
Deinococcota	0	0	0	0	0	0	0	0	0	0	0	0.373233	0	0	0	0	0	0	0.0803635	0.989442	0.692014	0.606493	0	0.237192	0	0	0.353386	0.638754	0	0.986923	0	0.429303	0	0.177218	0	0	0	0	0	0	0	0	0	0	0	0	0	0	0
Desulfobacterota	0	0	0	0	0	0	0	0	0	0	0	0	0	0	0	0	0	0	0	0	0	0	0	0	0	0	0	0	0	0	0	0	0	0	0	0	0	0	0.323527	0	0	0	0	0	0	0	0	0	0
Armatimonadota	0	0	0	0	0	0	0	0	0	0	0	0	0	0	0	0	0	0	0	0	0	0	0	0	0	0	0	0	0	0	0	0	0	0	0	0	0	0	0	0	0	0	0	0	0	0	0	0	0
WPS-2	0	0	0	0	0	0	0	0	0	0	0	0	0	0	0	0	0	0	0	0	0	0	0	0	0	0	0	0	0	0	0	0	0	0	0	0.351597	0.552126	0	0	0	0	0	0	0	0	0	0	0	0
Nitrospirota	0	0	0	0	0	0	0	0	0	0	0	0	0	0	0	0	0	0	0	0	0	0	0	0	0	0	0	0	0	0	0	0	0	0	0	0	0	0	0	0	0	0	0	0	0	0	0	0	0
SAR324clade(MarinegroupB)	0	0	0	0	0	0	0	0	0	0	0	0	0	0	0	0	0	0	0	0	0	0	0	0	0	0	0	0	0	0	0	0	0	0	0	0	0	0	0	0	0	0	0	0	0	0	0	0	0
Fibrobacterota	0	0	0	0	0	0	0	0	0	0	0	0	0	0	0	0	0	0	0	0	0	0	0	0	0	0	0	0	0	0	0	0	0	0	0	0	0	0	0	0	0	0	0	0	0	0	0	0	0
Elusimicrobiota	0	0	0	0	0	0	0	0	0	0	0	0	0	0	0	0	0	0	0	0	0	0	0	0	0	0	0	0	0	0	0	0	0	0	0	0	0	0	0	0	0	0	0	0	0	0	0	0	0
NB1-j	0	0	0	0	0	0	0	0	0	0	0	0	0	0	0	0	0	0	0	0	0	0	0	0	0	0	0	0	0	0	0	0	0	0	0	0	0	0	0	0	0	0	0	0	0	0	0	0	0
Deferribacterota	0	0	0	0	0	0	0	0	0	0	0	0	0	0	0	0	0	0	0	0	0	0	0	0	0	0	0	0	0	0	0	0	0	0	0	0	0	0	0	0	0	0	0	0	0	0	0	0	0
Planctomycetota	0	0	0	0	0	0	0	0	0	0	0	0	0	0	0	0	0	0	0	0	0	0	0	0	0	0	0	0	0	0	0	0	0	0	0	0	0	0	0	0	0	0	0	0	0	0	0	0	0
WS2	0	0	0	0	0	0	0	0	0	0	0	0	0	0	0	0	0	0	0	0	0	0	0	0	0	0	0	0	0	0	0	0	0	0	0	0	0	0	0	0	0	0	0	0	0	0	0	0	0
MBNT15	0	0	0	0	0	0	0	0	0	0	0	0	0	0	0	0	0	0	0	0	0	0	0	0	0	0	0	0	0	0	0	0	0	0	0	0	0	0	0	0	0	0	0	0	0	0	0	0	0
Synergistota	0	0	0	0	0	0	0	0	0	0	0	0	0	0	0	0	0	0	0	0	0	0	0	0	0	0	0	0	0	0	0	0	0	0	0	0	0	0	0	0	0	0	0	0	0	0	0	0	0
LCP-89	0	0	0	0	0	0	0	0	0	0	0	0	0	0	0	0	0	0	0	0	0	0	0	0	0	0	0	0	0	0	0	0	0	0	0	0	0	0	0	0	0	0	0	0	0	0	0	0	0
Crenarchaeota	0	0	0	0	0	0	0	0	0	0	0	0	0	0	0	0	0	0	0	0	0	0	0	0	0	0	0	0	0	0	0	0	0	0	0	0	0	0	0	0	0	0	0	0	0	0	0	0	0
Euryarchaeota	0	0	0	0	0	0	0	0	0	0	0	0	0	0	0	0	0	0	0	0	0	0	0	0	0	0	0	0	0	0	0	0	0	0	0	0	0	0	0	0	0	0	0	0	0	0	0	0	0
Hydrogenedentes	0	0	0	0	0	0	0	0	0	0	0	0	0	0	0	0	0	0	0	0	0	0	0	0	0	0	0	0	0	0	0	0	0	0	0	0	0	0	0	0	0	0	0	0	0	0	0	0	0
Arthropoda	0	0	0	0	0	0	0	0	0	0	0	0	0	0	0	0	0	0	0	0	0	0	0	0	0	0	0	0	0	0	0	0	0	0	0	0	0	0	0	0	0	0	0	0	0	0	0	0	0
Sumerlaeota	0	0	0	0	0	0	0	0	0	0	0	0	0	0	0	0	0	0	0	0	0	0	0	0	0	0	0	0	0	0	0	0	0	0	0	0	0	0	0	0	0	0	0	0	0	0	0	0	0
Dadabacteria	0	0	0	0	0	0	0	0	0	0	0	0	0	0	0	0	0	0	0	0	0	0	0	0	0	0	0	0	0	0	0	0	0	0	0	0	0	0	0	0	0	0	0	0	0	0	0	0	0
NKB15	0	0	0	0	0	0	0	0	0	0	0	0	0	0	0	0	0	0	0	0	0	0	0	0	0	0	0	0	0	0	0	0	0	0	0	0	0	0	0	0	0	0	0	0	0	0	0	0	0
Nanoarchaeota	0	0	0	0	0	0	0	0	0	0	0	0	0	0	0	0	0	0	0	0	0	0	0	0	0	0	0	0	0	0	0	0	0	0	0	0	0	0	0	0	0	0	0	0	0	0	0	0	0
Thermotogota	0	0	0	0	0	0	0	0	0	0	0	0	0	0	0	0	0	0	0	0	0	0	0	0	0	0	0	0	0	0	0	0	0	0	0	0	0	0	0	0	0	0	0	0	0	0	0	0	0
Cloacimonadota	0	0	0	0	0	0	0	0	0	0	0	0	0	0	0	0	0	0	0	0	0	0	0	0	0	0	0	0	0	0	0	0	0	0	0	0	0	0	0	0	0	0	0	0	0	0	0	0	0
[truncated: 451 more columns]

## Sheet: Sheet3
Species	Sample name	Sample name in Boxes	Box Number	Position inside Box	DNA concentration ng/ul	Date of collection	Locality	Country	Latitude	Longitude	Preservation method	Stage (adult/larva)
Aedes japonicus	A1	LM 209 1	1	A1	16.8	2021-06-24	Lelystad	The Netherlands	52.5278	5.46472	Ethanol	Adult
Aedes japonicus	A2	LM 209 2	1	A2	31.4	2021-06-24	Lelystad	The Netherlands	52.5278	5.46472	Ethanol	Adult
Aedes japonicus	A3	LM 209 3	1	A3	24.7	2021-06-24	Lelystad	The Netherlands	52.5278	5.46472	Ethanol	Adult
Aedes japonicus	A4	LM 209 4	1	A4	28.7	2021-06-24	Lelystad	The Netherlands	52.5278	5.46472	Ethanol	Adult
Aedes japonicus	A5	LM 209 5	1	A5	23.1	2021-06-24	Lelystad	The Netherlands	52.5278	5.46472	Ethanol	Adult
Aedes japonicus	A6	LM 209 6	1	A6	21.5	2021-06-24	Lelystad	The Netherlands	52.5278	5.46472	Ethanol	Adult
Aedes japonicus	A7	LM 209 7	1	A7	2.11	2021-06-24	Lelystad	The Netherlands	52.5278	5.46472	Ethanol	Adult
Aedes japonicus	A8	LM 209 8	1	A8	25.7	2021-06-24	Lelystad	The Netherlands	52.5278	5.46472	Ethanol	Adult
Aedes japonicus	A9	LM 209 9	1	A9	19.6	2021-06-24	Lelystad	The Netherlands	52.5278	5.46472	Ethanol	Adult
Aedes japonicus	A10	LM 209 10	1	A10	31	2021-06-24	Lelystad	The Netherlands	52.5278	5.46472	Ethanol	Adult
Aedes japonicus	A11	LM 209 11	1	B1	24.4	2021-06-24	Lelystad	The Netherlands	52.5278	5.46472	Ethanol	Adult
Aedes japonicus	A12	LM 209 12	1	B2	23.4	2021-06-24	Lelystad	The Netherlands	52.5278	5.46472	Ethanol	Adult
Aedes japonicus	A13	LM 209 13	1	B3	31	2021-06-24	Lelystad	The Netherlands	52.5278	5.46472	Ethanol	Adult
Aedes japonicus	A14	LM 209 14	1	B4	20.4	2021-06-24	Lelystad	The Netherlands	52.5278	5.46472	Ethanol	Adult
Aedes japonicus	A15	LM 209 15	1	B5	21.9	2021-06-24	Lelystad	The Netherlands	52.5278	5.46472	Ethanol	Adult
Aedes japonicus	A16	LM 209 16	1	B6	17.1	2021-06-24	Lelystad	The Netherlands	52.5278	5.46472	Ethanol	Adult
Aedes japonicus	A17	LM 209 17	1	B7	27	2021-06-24	Lelystad	The Netherlands	52.5278	5.46472	Ethanol	Adult
Aedes japonicus	A18	LM 209 18	1	B8	16.8	2021-06-24	Lelystad	The Netherlands	52.5278	5.46472	Ethanol	Adult
Aedes japonicus	A19	LM 209 19	1	B9	16.8	2021-06-24	Lelystad	The Netherlands	52.5278	5.46472	Ethanol	Adult
Aedes japonicus	A20	LM 209 20	1	B10	21.8	2021-06-24	Lelystad	The Netherlands	52.5278	5.46472	Ethanol	Adult
Aedes japonicus	A21	LM 209 21	1	C1	13.8	2021-06-24	Lelystad	The Netherlands	52.5278	5.46472	Ethanol	Adult
Aedes japonicus	A22	LM 209 22	1	C2	8.11	2021-06-24	Lelystad	The Netherlands	52.5278	5.46472	Ethanol	Adult
Aedes japonicus	A23	LM 209 23	1	C3	28	2021-06-24	Lelystad	The Netherlands	52.5278	5.46472	Ethanol	Adult
Aedes japonicus	A24	LM 209 24	1	C4	20.3	2021-06-24	Lelystad	The Netherlands	52.5278	5.46472	Ethanol	Adult
Aedes japonicus	A25	LM 209 25	1	C5	15.2	2021-06-24	Lelystad	The Netherlands	52.5278	5.46472	Ethanol	Adult
Aedes japonicus	B1	LM 210 1	1	C6	8.94	23.07.21 + 28.07.21	Althofen	Austria	46.8709	14.4749	Ethanol	Larva
Aedes japonicus	B2	LM 210 2	1	C7	8.34	23.07.21 + 28.07.21	Althofen	Austria	46.8709	14.4749	Ethanol	Larva
Aedes japonicus	B3	LM 210 3	1	C8	15.7	23.07.21 + 28.07.21	Althofen	Austria	46.8709	14.4749	Ethanol	Larva
Aedes japonicus	B4	LM 210 4	1	C9	12.3	23.07.21 + 28.07.21	Althofen	Austria	46.8709	14.4749	Ethanol	Larva
Aedes japonicus	B5	LM 210 5	1	C10	13.1	23.07.21 + 28.07.21	Althofen	Austria	46.8709	14.4749	Ethanol	Larva
Aedes japonicus	B6	LM 210 6	1	D1	13.7	23.07.21 + 28.07.21	Althofen	Austria	46.8709	14.4749	Ethanol	Larva
Aedes japonicus	B7	LM 210 7	1	D2	9.33	23.07.21 + 28.07.21	Althofen	Austria	46.8709	14.4749	Ethanol	Larva
Aedes japonicus	B8	LM 210 8	1	D3	12.2	23.07.21 + 28.07.21	Althofen	Austria	46.8709	14.4749	Ethanol	Larva
Aedes japonicus	B9	LM 210 9	1	D4	11	23.07.21 + 28.07.21	Althofen	Austria	46.8709	14.4749	Ethanol	Larva
Aedes japonicus	B10	LM 210 10	1	D5	8.6	23.07.21 + 28.07.21	Althofen	Austria	46.8709	14.4749	Ethanol	Larva
Aedes japonicus	B11	LM 210 11	1	D6	10.6	23.07.21 + 28.07.21	Althofen	Austria	46.8709	14.4749	Ethanol	Larva
Aedes japonicus	B12	LM 210 12	1	D7	4.86	23.07.21 + 28.07.21	Althofen	Austria	46.8709	14.4749	Ethanol	Larva
Aedes japonicus	B13	LM 210 13	1	D8	7.06	23.07.21 + 28.07.21	Althofen	Austria	46.8709	14.4749	Ethanol	Larva
Aedes japonicus	B14	LM 210 14	1	D9	11.5	23.07.21 + 28.07.21	Althofen	Austria	46.8709	14.4749	Ethanol	Larva
Aedes japonicus	B15	LM 210 15	1	D10	4.95	23.07.21 + 28.07.21	Althofen	Austria	46.8709	14.4749	Ethanol	Larva
Aedes japonicus	B16	LM 210 16	1	E1	8.53	23.07.21 + 28.07.21	Althofen	Austria	46.8709	14.4749	Ethanol	Larva
Aedes japonicus	B17	LM 210 17	1	E2	11.3	23.07.21 + 28.07.21	Althofen	Austria	46.8709	14.4749	Ethanol	Larva
Aedes japonicus	B18	LM 210 18	1	E3	8.85	23.07.21 + 28.07.21	Althofen	Austria	46.8709	14.4749	Ethanol	Larva
Aedes japonicus	B19	LM 210 19	1	E4	2.16	23.07.21 + 28.07.21	Althofen	Austria	46.8709	14.4749	Ethanol	Larva
Aedes japonicus	B20	LM 210 20	1	E5	7.55	23.07.21 + 28.07.21	Althofen	Austria	46.8709	14.4749	Ethanol	Larva
Aedes japonicus	B21	LM 211 1	1	E6	3.85	23.07.21 + 28.07.21	Althofen	Austria	46.8709	14.4749	Ethanol	Larva
Aedes japonicus	B22	LM 211 2	1	E7	5.98	23.07.21 + 28.07.21	Althofen	Austria	46.8709	14.4749	Ethanol	Larva
Aedes japonicus	B23	LM 211 3	1	E8	1.88	23.07.21 + 28.07.21	Althofen	Austria	46.8709	14.4749	Ethanol	Larva
Aedes japonicus	B24	LM 211 4	1	E9	6.45	23.07.21 + 28.07.21	Althofen	Austria	46.8709	14.4749	Ethanol	Larva
Aedes japonicus	B25	LM 211 5	1	E10	3.63	23.07.21 + 28.07.21	Althofen	Austria	46.8709	14.4749	Ethanol	Larva
Aedes japonicus	B26	LM 211 6	1	F1	too low	23.07.21 + 28.07.21	Althofen	Austria	46.8709	14.4749	Ethanol	Larva
Aedes japonicus	B27	LM 211 7	1	F2	2.45	23.07.21 + 28.07.21	Althofen	Austria	46.8709	14.4749	Ethanol	Larva
Aedes japonicus	B28	LM 211 8	1	F3	6.33	23.07.21 + 28.07.21	Althofen	Austria	46.8709	14.4749	Ethanol	Larva
Aedes japonicus	B29	LM 211 9	1	F4	7.38	23.07.21 + 28.07.21	Althofen	Austria	46.8709	14.4749	Ethanol	Larva
Aedes japonicus	B30	LM 211 10	1	F5	too low	23.07.21 + 28.07.21	Althofen	Austria	46.8709	14.4749	Ethanol	Larva
Aedes japonicus	B31	LM 211 11	1	F6	2.96	23.07.21 + 28.07.21	Althofen	Austria	46.8709	14.4749	Ethanol	Larva
Aedes japonicus	B32	LM 211 12	1	F7	2.55	23.07.21 + 28.07.21	Althofen	Austria	46.8709	14.4749	Ethanol	Larva
Aedes japonicus	B33	LM 211 13	1	F8	8.73	23.07.21 + 28.07.21	Althofen	Austria	46.8709	14.4749	Ethanol	Larva
Aedes japonicus	B34	LM 211 14	1	F9	5.5	23.07.21 + 28.07.21	Althofen	Austria	46.8709	14.4749	Ethanol	Larva
Aedes japonicus	C1	LM 212 1	1	F10	9.19	July + August 2020	Alava	Spain	42.6608	-2.50992	Ethanol	Adult
Aedes japonicus	C2	LM 212 2	1	G1	1.83	July + August 2020	Alava	Spain	42.6608	-2.50992	Ethanol	Adult
Aedes japonicus	C3	LM 212 3	1	G2	5.07	July + August 2020	Alava	Spain	42.6608	-2.50992	Ethanol	Adult
Aedes japonicus	C4	LM 212 4	1	G3	5.32	July + August 2020	Alava	Spain	42.6608	-2.50992	Ethanol	Adult
Aedes japonicus	C5	LM 212 5	1	G4	9.15	July + August 2020	Alava	Spain	42.6608	-2.50992	Ethanol	Adult
Aedes japonicus	C6	LM 212 6	1	G5	13.2	July + August 2020	Alava	Spain	42.6608	-2.50992	Ethanol	Adult
Aedes japonicus	C7	LM 212 7	1	G6	19	July + August 2020	Alava	Spain	42.6608	-2.50992	Ethanol	Adult
Aedes japonicus	C8	LM 212 8	1	G7	24.5	July + August 2020	Alava	Spain	42.6608	-2.50992	Ethanol	Adult
Aedes japonicus	C9	LM 212 9	1	G8	16	July + August 2020	Alava	Spain	42.6608	-2.50992	Ethanol	Adult
Aedes japonicus	C10	LM 212 10	1	G9	2.93	July + August 2020	Alava	Spain	42.6608	-2.50992	Ethanol	Adult
Aedes japonicus	C11	LM 212 11	1	G10	18.6	July + August 2020	Alava	Spain	42.6608	-2.50992	Ethanol	Adult
Aedes japonicus	C12	LM 212 12	1	H1	17.7	July + August 2020	Alava	Spain	42.6608	-2.50992	Ethanol	Adult
Aedes japonicus	C13	LM 212 13	1	H2	7.09	July + August 2020	Alava	Spain	42.6608	-2.50992	Ethanol	Adult
Aedes japonicus	C14	LM 212 14	1	H3	10.4	July + August 2020	Alava	Spain	42.6608	-2.50992	Ethanol	Adult
Aedes japonicus	C15	LM 212 15	1	H4	16	July + August 2020	Alava	Spain	42.6608	-2.50992	Ethanol	Adult
Aedes japonicus	D1	LM 213 1	1	H5	18.7	June + July + September 2020	Alava	Spain	42.9689	-2.61821	Ethanol	Adult
Aedes japonicus	D2	LM 213 2	1	H6	8.68	June + July + September 2020	Alava	Spain	42.9689	-2.61821	Ethanol	Adult
Aedes japonicus	D3	LM 213 3	1	H7	14.5	June + July + September 2020	Alava	Spain	42.9689	-2.61821	Ethanol	Adult
Aedes japonicus	D4	LM 213 4	1	H8	23.4	June + July + September 2020	Alava	Spain	42.9689	-2.61821	Ethanol	Adult
Aedes japonicus	D5	LM 213 5	1	H9	11.1	June + July + September 2020	Alava	Spain	42.9689	-2.61821	Ethanol	Adult
Aedes japonicus	D6	LM 213 6	1	H10	6.29	June + July + September 2020	Alava	Spain	42.9689	-2.61821	Ethanol	Adult
Aedes japonicus	D7	LM 213 7	1	I1	27.4	June + July + September 2020	Alava	Spain	42.9689	-2.61821	Ethanol	Adult
Aedes japonicus	D8	LM 213 8	1	I2	9.81	June + July + September 2020	Alava	Spain	42.9689	-2.61821	Ethanol	Adult
Aedes japonicus	D9	LM 213 9	1	I3	12.2	June + July + September 2020	Alava	Spain	42.9689	-2.61821	Ethanol	Adult
Aedes japonicus	D10	LM 213 10	1	I4	12.4	June + July + September 2020	Alava	Spain	42.9689	-2.61821	Ethanol	Adult
Aedes japonicus	E1	LM 214 1	1	I5	18.7	2021-09-02	Szalafő (Vas)	Hungary	46.8623	16.3682	Ethanol	Larva
Aedes japonicus	E2	LM 214 2	1	I6	27.5	2021-09-02	Szalafő (Vas)	Hungary	46.8623	16.3682	Ethanol	Larva
Aedes japonicus	E3	LM 214 3	1	I7	9.85	2021-09-02	Szalafő (Vas)	Hungary	46.8623	16.3682	Ethanol	Larva
Aedes japonicus	E4	LM 214 4	1	I8	17.3	2021-09-02	Szalafő (Vas)	Hungary	46.8623	16.3682	Ethanol	Larva
Aedes japonicus	E5	LM 214 5	1	I9	7.83	2021-09-02	Szalafő (Vas)	Hungary	46.8623	16.3682	Ethanol	Larva
Aedes japonicus	E6	LM 214 6	1	I10	23.3	2021-09-02	Szalafő (Vas)	Hungary	46.8623	16.3682	Ethanol	Larva
Aedes japonicus	E7	LM 214 7	1	J1	7.77	2021-09-02	Szalafő (Vas)	Hungary	46.8623	16.3682	Ethanol	Larva
Aedes japonicus	E8	LM 214 8	1	J2	12.7	2021-09-02	Szalafő (Vas)	Hungary	46.8623	16.3682	Ethanol	Larva
Aedes japonicus	E9	LM 214 9	1	J3	24.1	2021-09-02	Szalafő (Vas)	Hungary	46.8623	16.3682	Ethanol	Larva
Aedes japonicus	E10	LM 214 10	1	J4	18.1	2021-09-02	Szalafő (Vas)	Hungary	46.8623	16.3682	Ethanol	Larva
Aedes japonicus	E11	LM 214 11	1	J5	10.7	2021-09-02	Szalafő (Vas)	Hungary	46.8623	16.3682	Ethanol	Larva
Aedes japonicus	E12	LM 214 12	1	J6	6.27	2021-09-02	Szalafő (Vas)	Hungary	46.8623	16.3682	Ethanol	Larva
Aedes japonicus	E13	LM 214 13	1	J7	21.9	2021-09-02	Szalafő (Vas)	Hungary	46.8623	16.3682	Ethanol	Larva
Aedes japonicus	E14	LM 214 14	1	J8	19.8	2021-09-02	Szalafő (Vas)	Hungary	46.8623	16.3682	Ethanol	Larva
Aedes japonicus	E15	LM 214 15	1	J9	21.5	2021-09-02	Szalafő (Vas)	Hungary	46.8623	16.3682	Ethanol	Larva
Aedes japonicus	E16	LM 214 16	1	J10	17.8	2021-09-02	Szalafő (Vas)	Hungary	46.8623	16.3682	Ethanol	Larva
Aedes japonicus	E17	LM 214 17	2	A1	21.3	2021-09-02	Szalafő (Vas)	Hungary	46.8623	16.3682	Ethanol	Larva
Aedes japonicus	E18	LM 214 18	2	A2	10.6	2021-09-02	Szalafő (Vas)	Hungary	46.8623	16.3682	Ethanol	Larva
Aedes japonicus	F1	LM 215 1	2	A3	10.8	2021-09-02	Őriszentpéter (Vas)	Hungary	46.8473	16.399	Ethanol	Larva
Aedes japonicus	F2	LM 215 2	2	A4	9.08	2021-09-02	Őriszentpéter (Vas)	Hungary	46.8473	16.399	Ethanol	Larva
Aedes japonicus	F3	LM 215 3	2	A5	7.41	2021-09-02	Őriszentpéter (Vas)	Hungary	46.8473	16.399	Ethanol	Larva
Aedes japonicus	F4	LM 215 4	2	A6	5.93	2021-09-02	Őriszentpéter (Vas)	Hungary	46.8473	16.399	Ethanol	Larva
Aedes japonicus	F5	LM 215 5	2	A7	8.58	2021-09-02	Őriszentpéter (Vas)	Hungary	46.8473	16.399	Ethanol	Larva
Aedes japonicus	F6	LM 215 6	2	A8	20.2	2021-09-02	Őriszentpéter (Vas)	Hungary	46.8473	16.399	Ethanol	Larva
Aedes japonicus	F7	LM 215 7	2	A9	7.42	2021-09-02	Őriszentpéter (Vas)	Hungary	46.8473	16.399	Ethanol	Larva
Aedes japonicus	F8	LM 215 8	2	A10	9.26	2021-09-02	Őriszentpéter (Vas)	Hungary	46.8473	16.399	Ethanol	Larva
Aedes japonicus	F9	LM 215 9	2	B1	6.78	2021-09-02	Őriszentpéter (Vas)	Hungary	46.8473	16.399	Ethanol	Larva
Aedes japonicus	F10	LM 215 10	2	B2	5.61	2021-09-02	Őriszentpéter (Vas)	Hungary	46.8473	16.399	Ethanol	Larva
Aedes japonicus	G1	LM 216 1	2	B3	15.3	2021-09-02	Őriszentpéter (Vas)	Hungary	46.8448	16.411	Ethanol	Larva
Aedes japonicus	G2	LM 216 2	2	B4	9.9	2021-09-02	Őriszentpéter (Vas)	Hungary	46.8448	16.411	Ethanol	Larva
Aedes japonicus	G3	LM 216 3	2	B5	2.8	2021-09-02	Őriszentpéter (Vas)	Hungary	46.8448	16.411	Ethanol	Larva
Aedes japonicus	G4	LM 216 4	2	B6	2.92	2021-09-02	Őriszentpéter (Vas)	Hungary	46.8448	16.411	Ethanol	Larva
Aedes japonicus	G5	LM 216 5	2	B7	3.27	2021-09-02	Őriszentpéter (Vas)	Hungary	46.8448	16.411	Ethanol	Larva
Aedes japonicus	G6	LM 216 6	2	B8	9.35	2021-09-02	Őriszentpéter (Vas)	Hungary	46.8448	16.411	Ethanol	Larva
Aedes japonicus	G7	LM 216 7	2	B9	5.39	2021-09-02	Őriszentpéter (Vas)	Hungary	46.8448	16.411	Ethanol	Larva
Aedes japonicus	G8	LM 216 8	2	B10	6.84	2021-09-02	Őriszentpéter (Vas)	Hungary	46.8448	16.411	Ethanol	Larva
Aedes japonicus	G9	LM 216 9	2	C1	4.99	2021-09-02	Őriszentpéter (Vas)	Hungary	46.8448	16.411	Ethanol	Larva
Aedes japonicus	G10	LM 216 10	2	C2	2.83	2021-09-02	Őriszentpéter (Vas)	Hungary	46.8448	16.411	Ethanol	Larva
Aedes japonicus	H1	LM 217 1	5	F3	3.99	27.06 - 25.08.2021	Kovácsszénája (Baranya)	Hungary	46.1705	18.1077	Ethanol	Adult
Aedes japonicus	H2	LM 217 2	5	F4	9.52	27.06 - 25.08.2021	Kovácsszénája (Baranya)	Hungary	46.1705	18.1077	Ethanol	Adult
Aedes japonicus	H3	LM 217 3	2	C3	12.2	27.06 - 25.08.2021	Kovácsszénája (Baranya)	Hungary	46.1705	18.1077	Ethanol	Adult
Aedes japonicus	H4	LM 217 4	2	C4	9.22	27.06 - 25.08.2021	Kovácsszénája (Baranya)	Hungary	46.1705	18.1077	Ethanol	Adult
Aedes japonicus	H5	LM 217 5	2	C5	14.8	27.06 - 25.08.2021	Kovácsszénája (Baranya)	Hungary	46.1705	18.1077	Ethanol	Adult
Aedes japonicus	H6	LM 217 6	2	C6	15.9	27.06 - 25.08.2021	Kovácsszénája (Baranya)	Hungary	46.1705	18.1077	Ethanol	Adult
Aedes japonicus	H7	LM 217 7	2	C7	4	27.06 - 25.08.2021	Kovácsszénája (Baranya)	Hungary	46.1705	18.1077	Ethanol	Adult
Aedes japonicus	H8	LM 217 8	2	C8	19.9	27.06 - 25.08.2021	Kovácsszénája (Baranya)	Hungary	46.1705	18.1077	Ethanol	Adult
Aedes japonicus	H9	LM 217 9	2	C9	21.2	27.06 - 25.08.2021	Kovácsszénája (Baranya)	Hungary	46.1705	18.1077	Ethanol	Adult
Aedes japonicus	H10	LM 217 10	2	C10	12	27.06 - 25.08.2021	Kovácsszénája (Baranya)	Hungary	46.1705	18.1077	Ethanol	Adult
Aedes japonicus	H11	LM 217 11	2	D1	24.7	27.06 - 25.08.2021	Kovácsszénája (Baranya)	Hungary	46.1705	18.1077	Ethanol	Adult
Aedes japonicus	H12	LM 217 12	2	D2	15.8	27.06 - 25.08.2021	Kovácsszénája (Baranya)	Hungary	46.1705	18.1077	Ethanol	Adult
Aedes japonicus	H13	LM 217 13	2	D3	5.12	27.06 - 25.08.2021	Kovácsszénája (Baranya)	Hungary	46.1705	18.1077	Ethanol	Adult
Aedes japonicus	H14	LM 217 14	2	D4	7.08	27.06 - 25.08.2021	Kovácsszénája (Baranya)	Hungary	46.1705	18.1077	Ethanol	Adult
Aedes japonicus	H15	LM 217 15	2	D5	4.54	27.06 - 25.08.2021	Kovácsszénája (Baranya)	Hungary	46.1705	18.1077	Ethanol	Adult
Aedes japonicus	H16	LM 217 16	2	D6	4.23	27.06 - 25.08.2021	Kovácsszénája (Baranya)	Hungary	46.1705	18.1077	Ethanol	Adult
Aedes japonicus	H17	LM 217 17	2	D7	3.13	27.06 - 25.08.2021	Kovácsszénája (Baranya)	Hungary	46.1705	18.1077	Ethanol	Adult
Aedes japonicus	H18	LM 217 18	2	D8	9.16	27.06 - 25.08.2021	Kovácsszénája (Baranya)	Hungary	46.1705	18.1077	Ethanol	Adult
Aedes japonicus	H19	LM 217 19	2	D9	10.7	27.06 - 25.08.2021	Kovácsszénája (Baranya)	Hungary	46.1705	18.1077	Ethanol	Adult
Aedes japonicus	H20	LM 217 20	2	D10	6.64	27.06 - 25.08.2021	Kovácsszénája (Baranya)	Hungary	46.1705	18.1077	Ethanol	Adult
Aedes japonicus	I1	LM 218	2	E1	8.62	2021-08-03	Orio (Gipuzkoa)	Spain	43.2908	-2.10564	frozen at -40ºC + ethanol (added to send the samples)	Adult
Aedes japonicus	J1	LM 219 1	5	E9	10.6	2021-04-29	Orio (Gipuzkoa)	Spain	43290795	-2105643	frozen at -40ºC + ethanol (added to send the samples)	Adult
Aedes japonicus	J2	LM 219 2	5	E10	6.78	2021-04-29	Orio (Gipuzkoa)	Spain	43290795	-2105643	frozen at -40ºC + ethanol (added to send the samples)	Adult
Aedes japonicus	K1	LM 220 1	2	E2	25.4	2021-05-24	Orio (Gipuzkoa)	Spain	43.2908	-2.10564	frozen at -40ºC + ethanol (added to send the samples)	Adult
Aedes japonicus	K2	LM 220 2	2	E3	28	2021-05-24	Orio (Gipuzkoa)	Spain	43.2908	-2.10564	frozen at -40ºC + ethanol (added to send the samples)	Adult
Aedes japonicus	K3	LM 220 3	2	E4	10.5	2021-05-24	Orio (Gipuzkoa)	Spain	43.2908	-2.10564	frozen at -40ºC + ethanol (added to send the samples)	Adult
Aedes japonicus	K4	LM 220 4	2	E5	19.9	2021-05-24	Orio (Gipuzkoa)	Spain	43.2908	-2.10564	frozen at -40ºC + ethanol (added to send the samples)	Adult
Aedes japonicus	K5	LM 220 5	2	E6	16.8	2021-05-24	Orio (Gipuzkoa)	Spain	43.2908	-2.10564	frozen at -40ºC + ethanol (added to send the samples)	Adult
Aedes japonicus	L1	LM 221 1	2	E7	4.82	2020-12-07	Orio (Gipuzkoa)	Spain	43.2908	-2.10564	frozen at -40ºC + ethanol (added to send the samples)	Adult
Aedes japonicus	L2	LM 221 2	2	E8	8.54	2020-12-07	Orio (Gipuzkoa)	Spain	43.2908	-2.10564	frozen at -40ºC + ethanol (added to send the samples)	Adult
Aedes japonicus	L3	LM 221 3	2	E9	6.32	2020-12-07	Orio (Gipuzkoa)	Spain	43.2908	-2.10564	frozen at -40ºC + ethanol (added to send the samples)	Adult
Aedes japonicus	L4	LM 221 4	2	E10	6.44	2020-12-07	Orio (Gipuzkoa)	Spain	43.2908	-2.10564	frozen at -40ºC + ethanol (added to send the samples)	Adult
Aedes japonicus	L5	LM 221 5	2	F1	5.67	2020-12-07	Orio (Gipuzkoa)	Spain	43.2908	-2.10564	frozen at -40ºC + ethanol (added to send the samples)	Adult
Aedes japonicus	L6	LM 221 6	2	F2	24.4	2020-12-07	Orio (Gipuzkoa)	Spain	43.2908	-2.10564	frozen at -40ºC + ethanol (added to send the samples)	Adult
Aedes japonicus	L7	LM 221 7	2	F3	27.9	2020-12-07	Orio (Gipuzkoa)	Spain	43.2908	-2.10564	frozen at -40ºC + ethanol (added to send the samples)	Adult
Aedes japonicus	L8	LM 221 8	2	F4	11.8	2020-12-07	Orio (Gipuzkoa)	Spain	43.2908	-2.10564	frozen at -40ºC + ethanol (added to send the samples)	Adult
Aedes japonicus	M1	LM 222	2	F5	4.88	2021-02-08	Orio (Gipuzkoa)	Spain	43.2908	-2.10564	frozen at -40ºC + ethanol (added to send the samples)	Adult
Aedes japonicus	N1	LM 223 1	2	F6	1.95	2021-04-10	Orio (Gipuzkoa)	Spain	43.2908	-2.10564	frozen at -40ºC + ethanol (added to send the samples)	Adult
Aedes japonicus	N2	LM 223 2	2	F7	4.42	2021-04-10	Orio (Gipuzkoa)	Spain	43.2908	-2.10564	frozen at -40ºC + ethanol (added to send the samples)	Adult
Aedes japonicus	N3	LM 223 3	2	F8	2.85	2021-04-10	Orio (Gipuzkoa)	Spain	43.2908	-2.10564	frozen at -40ºC + ethanol (added to send the samples)	Adult
Aedes japonicus	O1	LM 224 1	2	F9	7.45	2021-05-03	Zamudio (Bizkaia)	Spain	43.3026	-2.86921	frozen at -40ºC + ethanol (added to send the samples)	Adult
Aedes japonicus	O2	LM 224 2	2	F10	3.99	2021-05-03	Zamudio (Bizkaia)	Spain	43.3026	-2.86921	frozen at -40ºC + ethanol (added to send the samples)	Adult
Aedes japonicus	O3	LM 224 3	2	G1	5.92	2021-05-03	Zamudio (Bizkaia)	Spain	43.3026	-2.86921	frozen at -40ºC + ethanol (added to send the samples)	Adult
Aedes japonicus	O4	LM 224 4	2	G2	5.24	2021-05-03	Zamudio (Bizkaia)	Spain	43.3026	-2.86921	frozen at -40ºC + ethanol (added to send the samples)	Adult
Aedes japonicus	O5	LM 224 5	2	G3	7.5	2021-05-03	Zamudio (Bizkaia)	Spain	43.3026	-2.86921	frozen at -40ºC + ethanol (added to send the samples)	Adult
Aedes japonicus	O6	LM 224 6	2	G4	5.08	2021-05-03	Zamudio (Bizkaia)	Spain	43.3026	-2.86921	frozen at -40ºC + ethanol (added to send the samples)	Adult
Aedes japonicus	O7	LM 224 7	2	G5	15.2	2021-05-03	Zamudio (Bizkaia)	Spain	43.3026	-2.86921	frozen at -40ºC + ethanol (added to send the samples)	Adult
Aedes japonicus	O8	LM 224 8	2	G6	3.56	2021-05-03	Zamudio (Bizkaia)	Spain	43.3026	-2.86921	frozen at -40ºC + ethanol (added to send the samples)	Adult
Aedes japonicus	O9	LM 224 9	2	G7	11.4	2021-05-03	Zamudio (Bizkaia)	Spain	43.3026	-2.86921	frozen at -40ºC + ethanol (added to send the samples)	Adult
Aedes japonicus	O10	LM 224 10	2	G8	2.8	2021-05-03	Zamudio (Bizkaia)	Spain	43.3026	-2.86921	frozen at -40ºC + ethanol (added to send the samples)	Adult
Aedes japonicus	O11	LM 224 11	2	G9	10.9	2021-05-03	Zamudio (Bizkaia)	Spain	43.3026	-2.86921	frozen at -40ºC + ethanol (added to send the samples)	Adult
Aedes japonicus	O12	LM 224 12	2	G10	5.21	2021-05-03	Zamudio (Bizkaia)	Spain	43.3026	-2.86921	frozen at -40ºC + ethanol (added to send the samples)	Adult
Aedes japonicus	O13	LM 224 13	2	H1	3.39	2021-05-03	Zamudio (Bizkaia)	Spain	43.3026	-2.86921	frozen at -40ºC + ethanol (added to send the samples)	Adult
Aedes japonicus	P1	LM 225 1	2	H2	10.7	2021-04-05	Zamudio (Bizkaia)	Spain	43.3026	-2.86921	frozen at -40ºC + ethanol (added to send the samples)	Adult
Aedes japonicus	P2	LM 225 2	2	H3	14	2021-04-05	Zamudio (Bizkaia)	Spain	43.3026	-2.86921	frozen at -40ºC + ethanol (added to send the samples)	Adult
Aedes japonicus	P3	LM 225 3	2	H4	9.22	2021-04-05	Zamudio (Bizkaia)	Spain	43.3026	-2.86921	frozen at -40ºC + ethanol (added to send the samples)	Adult
Aedes japonicus	P4	LM 225 4	2	H5	21.4	2021-04-05	Zamudio (Bizkaia)	Spain	43.3026	-2.86921	frozen at -40ºC + ethanol (added to send the samples)	Adult
Aedes japonicus	P5	LM 225 5	2	H6	8.79	2021-04-05	Zamudio (Bizkaia)	Spain	43.3026	-2.86921	frozen at -40ºC + ethanol (added to send the samples)	Adult
Aedes japonicus	P6	LM 225 6	2	H7	12.9	2021-04-05	Zamudio (Bizkaia)	Spain	43.3026	-2.86921	frozen at -40ºC + ethanol (added to send the samples)	Adult
Aedes japonicus	P7	LM 225 7	2	H8	21.5	2021-04-05	Zamudio (Bizkaia)	Spain	43.3026	-2.86921	frozen at -40ºC + ethanol (added to send the samples)	Adult
Aedes japonicus	Q1	LM 226 1	2	H9	7.56	2021-09-30	Steinbach 68700	France	47.8213	7.15005	Ethanol 96%	Larva
Aedes japonicus	Q2	LM 226 2	2	H10	9.71	2021-09-30	Steinbach 68700	France	47.8213	7.15005	Ethanol 96%	Larva
Aedes japonicus	Q3	LM 226 3	2	I1	10	2021-09-30	Steinbach 68700	France	47.8213	7.15005	Ethanol 96%	Larva
Aedes japonicus	Q4	LM 226 4	2	I2	15.7	2021-09-30	Steinbach 68700	France	47.8213	7.15005	Ethanol 96%	Larva
Aedes japonicus	Q5	LM 226 5	2	I3	9.3	2021-09-30	Steinbach 68700	France	47.8213	7.15005	Ethanol 96%	Larva
Aedes japonicus	Q6	LM 226 6	2	I4	11	2021-09-30	Steinbach 68700	France	47.8213	7.15005	Ethanol 96%	Larva
Aedes japonicus	Q7	LM 226 7	2	I5	14.8	2021-09-30	Steinbach 68700	France	47.8213	7.15005	Ethanol 96%	Larva
Aedes japonicus	Q8	LM 226 8	2	I6	16	2021-09-30	Steinbach 68700	France	47.8213	7.15005	Ethanol 96%	Larva
Aedes japonicus	Q9	LM 226 9	2	I7	9.46	2021-09-30	Steinbach 68700	France	47.8213	7.15005	Ethanol 96%	Larva
Aedes japonicus	Q10	LM 226 10	2	I8	5.84	2021-09-30	Steinbach 68700	France	47.8213	7.15005	Ethanol 96%	Larva
Aedes japonicus	R1	LM 227 1	2	I9	3.17	2021-09-30	Steinbach 68700	France	47.8213	7.15005	Ethanol 96%	Adult
Aedes japonicus	R2	LM 227 2	2	I10	2.17	2021-09-30	Steinbach 68700	France	47.8213	7.15005	Ethanol 96%	Adult
Aedes japonicus	R3	LM 227 3	2	J1	4.43	2021-09-30	Steinbach 68700	France	47.8213	7.15005	Ethanol 96%	Adult
Aedes japonicus	R4	LM 227 4	2	J2	2.68	2021-09-30	Steinbach 68700	France	47.8213	7.15005	Ethanol 96%	Adult
Aedes japonicus	R5	LM 227 5	2	J3	2.34	2021-09-30	Steinbach 68700	France	47.8213	7.15005	Ethanol 96%	Adult
Aedes japonicus	R6	LM 227 6	2	J4	1.16	2021-09-30	Steinbach 68700	France	47.8213	7.15005	Ethanol 96%	Adult
Aedes japonicus	R7	LM 227 7	2	J5	1.45	2021-09-30	Steinbach 68700	France	47.8213	7.15005	Ethanol 96%	Adult
Aedes japonicus	R8	LM 227 8	2	J6	3.95	2021-09-30	Steinbach 68700	France	47.8213	7.15005	Ethanol 96%	Adult
Aedes japonicus	R9	LM 227 9	2	J7	2.28	2021-09-30	Steinbach 68700	France	47.8213	7.15005	Ethanol 96%	Adult
Aedes japonicus	R10	LM 227 10	2	J8	too low	2021-09-30	Steinbach 68700	France	47.8213	7.15005	Ethanol 96%	Adult
Aedes japonicus	S1	LM 228	2	J9	3.34	2018-07-20	Siero, Asturias	Spain			Ethanol 96%	Adult
Aedes japonicus	T1	LM 229 1	5	F1	3.07	2018-07-20	Siero, Asturias	Spain			Ethanol 96%	Adult
Aedes japonicus	T2	LM 229 2	5	F2	4.36	2018-07-20	Siero, Asturias	Spain			Ethanol 96%	Adult
Aedes japonicus	U1	LM 230	2	J10	14.2	2018-07-21	Siero, Asturias	Spain			Ethanol 96%	Adult
Aedes japonicus	V1	LM 231	3	A1	4.66	2018-07-21	Siero, Asturias	Spain			Ethanol 96%	Adult
Aedes japonicus	W1	LM 232 1	3	A2	5.87	2018-07-20	Siero, Asturias	Spain			Ethanol 96%	Adult
Aedes japonicus	W2	LM 232 2	3	A3	8.84	2018-07-20	Siero, Asturias	Spain			Ethanol 96%	Adult
Aedes japonicus	W3	LM 232 3	3	A4	4.1	2018-07-20	Siero, Asturias	Spain			Ethanol 96%	Adult
Aedes japonicus	W4	LM 232 4	3	A5	7.4	2018-07-20	Siero, Asturias	Spain			Ethanol 96%	Adult
Aedes japonicus	W5	LM 232 5	3	A6	4.26	2018-07-20	Siero, Asturias	Spain			Ethanol 96%	Adult
Aedes japonicus	W6	LM 232 6	3	A7	3.53	2018-07-20	Siero, Asturias	Spain			Ethanol 96%	Adult
Aedes japonicus	W7	LM 232 7	3	A8	7.48	2018-07-20	Siero, Asturias	Spain			Ethanol 96%	Adult
Aedes japonicus	W8	LM 232 8	3	A9	7.68	2018-07-20	Siero, Asturias	Spain			Ethanol 96%	Adult
Aedes japonicus	W9	LM 232 9	3	A10	3.29	2018-07-20	Siero, Asturias	Spain			Ethanol 96%	Adult
Aedes japonicus	W10	LM 232 10	3	B1	2.84	2018-07-20	Siero, Asturias	Spain			Ethanol 96%	Adult
Aedes japonicus	W11	LM 232 11	3	B2	7.87	2018-07-20	Siero, Asturias	Spain			Ethanol 96%	Adult
Aedes japonicus	W12	LM 232 12	3	B3	7.52	2018-07-20	Siero, Asturias	Spain			Ethanol 96%	Adult
Aedes japonicus	W13	LM 232 13	3	B4	6.18	2018-07-20	Siero, Asturias	Spain			Ethanol 96%	Adult
Aedes japonicus	W14	LM 232 14	3	B5	10.5	2018-07-20	Siero, Asturias	Spain			Ethanol 96%	Adult
Aedes japonicus	W15	LM 232 15	3	B6	5.61	2018-07-20	Siero, Asturias	Spain			Ethanol 96%	Adult
Aedes japonicus	X1	LM 233	3	B7	9.23	2019-09-28	Infanzón, Gijón, Asturias	Spain	43.5418	-5.61268	Ethanol 96%	Adult
Aedes japonicus	Y1	LM 234	3	B8	7.51	2019-09-27	Avín, Onís, Asturias	Spain	43.3341	-4.95122	Ethanol 96%	Adult
Aedes japonicus	Z1	LM 235	3	B9	8.76	2019-09-27	Cardoso, Llanes, Asturias	Spain	43.4413	-4.91686	Ethanol 96%	Adult
Aedes japonicus	AA1	LM 236 1	3	B10	9.08	2019-09-26	Saja, Los Tojos, Cantabria	Spain	43.3508	-4.10433	Ethanol 96%	Adult
Aedes japonicus	AA2	LM 236 2	3	C1	2.8	2019-09-26	Saja, Los Tojos, Cantabria	Spain	43.3508	-4.10433	Ethanol 96%	Adult
Aedes japonicus	AB1	LM 237 1	3	C2	9.15	2019-06-26	Colombres, Pimiango, Asturias	Spain	43.3819	-4.55197	Ethanol 96%	Adult
Aedes japonicus	AB2	LM 237 2	3	C3	12	2019-06-26	Colombres, Pimiango, Asturias	Spain	43.3819	-4.55197	Ethanol 96%	Adult
Aedes japonicus	AB3	LM 237 3	3	C4	4.05	2019-06-26	Colombres, Pimiango, Asturias	Spain	43.3819	-4.55197	Ethanol 96%	Adult
Aedes japonicus	AB4	LM 237 4	3	C5	4.12	2019-06-26	Colombres, Pimiango, Asturias	Spain	43.3819	-4.55197	Ethanol 96%	Adult
Aedes japonicus	AB5	LM 237 5	3	C6	5.05	2019-06-26	Colombres, Pimiango, Asturias	Spain	43.3819	-4.55197	Ethanol 96%	Adult
Aedes japonicus	AB6	LM 237 6	3	C7	6.91	2019-06-26	Colombres, Pimiango, Asturias	Spain	43.3819	-4.55197	Ethanol 96%	Adult
Aedes japonicus	AB7	LM 237 7	3	C8	3.56	2019-06-26	Colombres, Pimiango, Asturias	Spain	43.3819	-4.55197	Ethanol 96%	Adult
Aedes japonicus	AB8	LM 237 8	3	C9	10.4	2019-06-26	Colombres, Pimiango, Asturias	Spain	43.3819	-4.55197	Ethanol 96%	Adult
Aedes japonicus	AB9	LM 237 9	3	C10	5.79	2019-06-26	Colombres, Pimiango, Asturias	Spain	43.3819	-4.55197	Ethanol 96%	Adult
Aedes japonicus	AB10	LM 237 10	3	D1	5.46	2019-06-26	Colombres, Pimiango, Asturias	Spain	43.3819	-4.55197	Ethanol 96%	Adult
Aedes japonicus	AC1	LM 238	3	D2	1.59	2019-09-30	Villanueva de Oscos, Asturias	Spain	43.5181	-6.41991	Ethanol 96%	Adult
Aedes japonicus	AD1	LM 239	3	D3	3.09	2019-09-28	Lieres, Siero, Asturias	Spain	43.3859	-5.58111	Ethanol 96%	Adult
Aedes japonicus	AE1	LM 240 1	3	D4	13.2	2020-06-07	Altzola, Elgoibar, Guipuzcoa	Spain	43.2356	-2.40067	Ethanol 96%	Adult
Aedes japonicus	AE2	LM 240 2	3	D5	6.68	2020-06-07	Altzola, Elgoibar, Guipuzcoa	Spain	43.2356	-2.40067	Ethanol 96%	Adult
Aedes japonicus	AE3	LM 240 3	3	D6	7.03	2020-06-07	Altzola, Elgoibar, Guipuzcoa	Spain	43.2356	-2.40067	Ethanol 96%	Adult
Aedes japonicus	AE4	LM 240 4	3	D7	7.83	2020-06-07	Altzola, Elgoibar, Guipuzcoa	Spain	43.2356	-2.40067	Ethanol 96%	Adult
Aedes japonicus	AF1	LM 241 1	3	D8	15.7	2020-06-14	Santa Klara, Elgoibar, Guipuzcoa	Spain	43.2167	-2.41987	Ethanol 96%	Adult
Aedes japonicus	AF2	LM 241 2	3	D9	16.4	2020-06-14	Santa Klara, Elgoibar, Guipuzcoa	Spain	43.2167	-2.41987	Ethanol 96%	Adult
Aedes japonicus	AF3	LM 241 3	3	D10	12.3	2020-06-14	Santa Klara, Elgoibar, Guipuzcoa	Spain	43.2167	-2.41987	Ethanol 96%	Adult
Aedes japonicus	AG1	LM 242 1	3	E1	13.2	2020-05-07	polígono (Huerto Haritz), Elgoibar, Guipuzcoa	Spain	43.2141	-2.40896	Ethanol 96%	Adult
Aedes japonicus	AG2	LM 242 2	3	E2	12.4	2020-05-07	polígono (Huerto Haritz), Elgoibar, Guipuzcoa	Spain	43.2141	-2.40896	Ethanol 96%	Adult
Aedes japonicus	AH1	LM 243	3	E3	11.2	2020-06-19	Santa Klara, Elgoibar, Guipuzcoa	Spain	43.2167	-2.41987	Ethanol 96%	Adult
Aedes japonicus	AI1	LM 244	3	E4	19.3	2020-04-06	Alto de Azcarate, Elgoibar, Guipuzcoa	Spain	43.2041	-2.36245	Ethanol 96%	Adult
Aedes japonicus	AJ1	LM 245	3	E5	5.21	2020-06-15	Santa Klara, Elgoibar, Guipuzcoa	Spain	43.2167	-2.41987	Ethanol 96%	Adult
Aedes japonicus	AK1	LM 246 1	3	E6	7.94	2020-05-07	Goiuria, Yurreta, Vizcaya	Spain	43.1893	-2.63942	Ethanol 96%	Adult
Aedes japonicus	AK2	LM 246 2	3	E7	6.8	2020-05-07	Goiuria, Yurreta, Vizcaya	Spain	43.1893	-2.63942	Ethanol 96%	Adult
Aedes japonicus	AK3	LM 246 3	3	E8	8.75	2020-05-07	Goiuria, Yurreta, Vizcaya	Spain	43.1893	-2.63942	Ethanol 96%	Adult
Aedes japonicus	AL1	LM 247 1	3	E9	4.74	2020-05-07	Altzola (terraza Haritz), Elgoibar, Guipuzcoa	Spain	43.2356	-2.40067	Ethanol 96%	Adult
Aedes japonicus	AL2	LM 247 2	3	E10	5.5	2020-05-07	Altzola (terraza Haritz), Elgoibar, Guipuzcoa	Spain	43.2356	-2.40067	Ethanol 96%	Adult
Aedes japonicus	AL3	LM 247 3	3	F1	1.52	2020-05-07	Altzola (terraza Haritz), Elgoibar, Guipuzcoa	Spain	43.2356	-2.40067	Ethanol 96%	Adult
Aedes japonicus	AL4	LM 247 4	3	F2	7.34	2020-05-07	Altzola (terraza Haritz), Elgoibar, Guipuzcoa	Spain	43.2356	-2.40067	Ethanol 96%	Adult
Aedes japonicus	AL5	LM 247 5	3	F3	4.55	2020-05-07	Altzola (terraza Haritz), Elgoibar, Guipuzcoa	Spain	43.2356	-2.40067	Ethanol 96%	Adult
Aedes japonicus	AL6	LM 247 6	3	F4	2.87	2020-05-07	Altzola (terraza Haritz), Elgoibar, Guipuzcoa	Spain	43.2356	-2.40067	Ethanol 96%	Adult
Aedes japonicus	AL7	LM 247 7	3	F5	8.19	2020-05-07	Altzola (terraza Haritz), Elgoibar, Guipuzcoa	Spain	43.2356	-2.40067	Ethanol 96%	Adult
Aedes japonicus	AL8	LM 247 8	3	F6	9.47	2020-05-07	Altzola (terraza Haritz), Elgoibar, Guipuzcoa	Spain	43.2356	-2.40067	Ethanol 96%	Adult
Aedes japonicus	AL9	LM 247 9	3	F7	11.4	2020-05-07	Altzola (terraza Haritz), Elgoibar, Guipuzcoa	Spain	43.2356	-2.40067	Ethanol 96%	Adult
Aedes japonicus	AL10	LM 247 10	3	F8	4.96	2020-05-07	Altzola (terraza Haritz), Elgoibar, Guipuzcoa	Spain	43.2356	-2.40067	Ethanol 96%	Adult
Aedes japonicus	AL11	LM 247 11	3	F9	3.99	2020-05-07	Altzola (terraza Haritz), Elgoibar, Guipuzcoa	Spain	43.2356	-2.40067	Ethanol 96%	Adult
Aedes japonicus	AL12	LM 247 12	3	F10	10.5	2020-05-07	Altzola (terraza Haritz), Elgoibar, Guipuzcoa	Spain	43.2356	-2.40067	Ethanol 96%	Adult
Aedes japonicus	AL13	LM 247 13	3	G1	5.6	2020-05-07	Altzola (terraza Haritz), Elgoibar, Guipuzcoa	Spain	43.2356	-2.40067	Ethanol 96%	Adult
Aedes japonicus	AL14	LM 247 14	3	G2	5.13	2020-05-07	Altzola (terraza Haritz), Elgoibar, Guipuzcoa	Spain	43.2356	-2.40067	Ethanol 96%	Adult
Aedes japonicus	AL15	LM 247 15	3	G3	10.2	2020-05-07	Altzola (terraza Haritz), Elgoibar, Guipuzcoa	Spain	43.2356	-2.40067	Ethanol 96%	Adult
Aedes japonicus	AL16	LM 247 16	3	G4	4.05	2020-05-07	Altzola (terraza Haritz), Elgoibar, Guipuzcoa	Spain	43.2356	-2.40067	Ethanol 96%	Adult
Aedes japonicus	AM1	LM 248	3	G5	3.59	2019-09-26	Ruente, Cantabria	Spain	43.2601	-4.26577	Ethanol 96%	Adult
Aedes japonicus	AN1	LM 249 1	3	G6	3.72	2019-09-26	Puenteles, Asturias	Spain	43.395	-4.64487	Ethanol 96%	Adult
Aedes japonicus	AN2	LM 249 2	3	G7	4.85	2019-09-26	Puenteles, Asturias	Spain	43.395	-4.64487	Ethanol 96%	Adult
Aedes japonicus	AN3	LM 249 3	3	G8	4.06	2019-09-26	Puenteles, Asturias	Spain	43.395	-4.64487	Ethanol 96%	Adult
Aedes japonicus	AN4	LM 249 4	3	G9	3.99	2019-09-26	Puenteles, Asturias	Spain	43.395	-4.64487	Ethanol 96%	Adult
Aedes japonicus	AN5	LM 249 5	3	G10	4.93	2019-09-26	Puenteles, Asturias	Spain	43.395	-4.64487	Ethanol 96%	Adult
Aedes japonicus	AN6	LM 249 6	3	H1	6.29	2019-09-26	Puenteles, Asturias	Spain	43.395	-4.64487	Ethanol 96%	Adult
Aedes japonicus	AN7	LM 249 7	3	H2	4.2	2019-09-26	Puenteles, Asturias	Spain	43.395	-4.64487	Ethanol 96%	Adult
Aedes japonicus	AN8	LM 249 8	3	H3	3.85	2019-09-26	Puenteles, Asturias	Spain	43.395	-4.64487	Ethanol 96%	Adult
Aedes japonicus	AN9	LM 249 9	3	H4	6.09	2019-09-26	Puenteles, Asturias	Spain	43.395	-4.64487	Ethanol 96%	Adult
Aedes japonicus	AN10	LM 249 10	3	H5	4.84	2019-09-26	Puenteles, Asturias	Spain	43.395	-4.64487	Ethanol 96%	Adult
Aedes japonicus	AN11	LM 249 11	3	H6	4.75	2019-09-26	Puenteles, Asturias	Spain	43.395	-4.64487	Ethanol 96%	Adult
Aedes japonicus	AN12	LM 249 12	3	H7	4.39	2019-09-26	Puenteles, Asturias	Spain	43.395	-4.64487	Ethanol 96%	Adult
Aedes japonicus	AN13	LM 249 13	3	H8	2.18	2019-09-26	Puenteles, Asturias	Spain	43.395	-4.64487	Ethanol 96%	Adult
Aedes japonicus	AO1	LM 250 1	3	H9	9.96	2019-09-26	Robriguero, Asturias	Spain	43.3495	-4.59715	Ethanol 96%	Adult
Aedes japonicus	AO2	LM 250 2	3	H10	3.2	2019-09-26	Robriguero, Asturias	Spain	43.3495	-4.59715	Ethanol 96%	Adult
Aedes japonicus	AO3	LM 250 3	3	I1	7.17	2019-09-26	Robriguero, Asturias	Spain	43.3495	-4.59715	Ethanol 96%	Adult
Aedes japonicus	AO4	LM 250 4	3	I2	7.51	2019-09-26	Robriguero, Asturias	Spain	43.3495	-4.59715	Ethanol 96%	Adult
Aedes japonicus	AO5	LM 250 5	3	I3	7.49	2019-09-26	Robriguero, Asturias	Spain	43.3495	-4.59715	Ethanol 96%	Adult
Aedes japonicus	AO6	LM 250 6	3	I4	9.44	2019-09-26	Robriguero, Asturias	Spain	43.3495	-4.59715	Ethanol 96%	Adult
Aedes japonicus	AO7	LM 250 7	3	I5	5.69	2019-09-26	Robriguero, Asturias	Spain	43.3495	-4.59715	Ethanol 96%	Adult
Aedes japonicus	AP1	LM 251 1	3	I6	13.2	2018-07-20	Siero, Asturias	Spain			Ethanol	Larva
Aedes japonicus	AP2	LM 251 2	3	I7	8.02	2018-07-20	Siero, Asturias	Spain			Ethanol	Larva
Aedes japonicus	AP3	LM 251 3	3	I8	12	2018-07-20	Siero, Asturias	Spain			Ethanol	Larva
Aedes japonicus	AP4	LM 251 4	3	I9	12.1	2018-07-20	Siero, Asturias	Spain			Ethanol	Larva
Aedes japonicus	AP5	LM 251 5	3	I10	32.9	2018-07-20	Siero, Asturias	Spain			Ethanol	Larva
Aedes japonicus	AP6	LM 251 6	3	J1	31.7	2018-07-20	Siero, Asturias	Spain			Ethanol	Larva
Aedes japonicus	AP7	LM 251 7	3	J2	3.74	2018-07-20	Siero, Asturias	Spain			Ethanol	Larva
Aedes japonicus	AP8	LM 251 8	3	J3	8.47	2018-07-20	Siero, Asturias	Spain			Ethanol	Larva
Aedes japonicus	AP9	LM 251 9	3	J4	31.2	2018-07-20	Siero, Asturias	Spain			Ethanol	Larva
Aedes japonicus	AP10	LM 251 10	3	J5	3.84	2018-07-20	Siero, Asturias	Spain			Ethanol	Larva
Aedes japonicus	AQ1	LM 252 1	4	D2	4.15	2018-05-19	Saga	Japan	33.3286	130.266	Ethanol	Adult
Aedes japonicus	AQ2	LM 252 2	4	D3	1.11	2018-05-19	Saga	Japan	33.3286	130.266	Ethanol	Adult
Aedes japonicus	AQ3	LM 252 3	4	D4	2.85	2018-05-19	Saga	Japan	33.3286	130.266	Ethanol	Adult
Aedes japonicus	AQ4	LM 252 4	4	D5	4.67	2018-05-19	Saga	Japan	33.3286	130.266	Ethanol	Adult
Aedes japonicus	AQ5	LM 252 5	4	D6	4.15	2018-05-19	Saga	Japan	33.3286	130.266	Ethanol	Adult
Aedes japonicus	AQ6	LM 252 6	4	D7	9.87	2018-05-19	Saga	Japan	33.3286	130.266	Ethanol	Adult
Aedes japonicus	AQ7	LM 252 9	4	D8	3.45	2018-05-19	Saga	Japan	33.3286	130.266	Ethanol	Adult
Aedes japonicus	AQ8	LM 252 10	4	D9	2.07	2018-05-19	Saga	Japan	33.3286	130.266	Ethanol	Adult
Aedes japonicus	AQ9	LM 252 11	4	D10	5.86	2018-05-19	Saga	Japan	33.3286	130.266	Ethanol	Adult
Aedes japonicus	AQ10	LM 252 12	4	E1	12.6	2018-05-19	Saga	Japan	33.3286	130.266	Ethanol	Adult
Aedes japonicus	AQ11	LM 252 13	4	E2	2.91	2018-05-19	Saga	Japan	33.3286	130.266	Ethanol	Adult
Aedes japonicus	AQ12	LM 252 14	4	E3	18.9	2018-05-19	Saga	Japan	33.3286	130.266	Ethanol	Adult
Aedes japonicus	AQ13	LM 252 15	4	E4	12.7	2018-05-19	Saga	Japan	33.3286	130.266	Ethanol	Adult
Aedes japonicus	AQ14	LM 252 16	4	E5	8.84	2018-05-19	Saga	Japan	33.3286	130.266	Ethanol	Adult
Aedes japonicus	AQ15	LM 252 17	4	E6	15.7	2018-05-19	Saga	Japan	33.3286	130.266	Ethanol	Adult
Aedes japonicus	AQ16	LM 252 18	4	E7	too low	2018-05-19	Saga	Japan	33.3286	130.266	Ethanol	Adult
Aedes japonicus	AQ17	LM 252 19	4	E8	1.09	2018-05-19	Saga	Japan	33.3286	130.266	Ethanol	Adult
Aedes japonicus	AQ18	LM 252 20	4	E9	1.5	2018-05-19	Saga	Japan	33.3286	130.266	Ethanol	Adult
Aedes japonicus	AQ19	LM 252 21	4	E10	7.24	2018-05-19	Saga	Japan	33.3286	130.266	Ethanol	Adult
Aedes japonicus	AQ20	LM 252 22	4	F1	6.64	2018-05-19	Saga	Japan	33.3286	130.266	Ethanol	Adult
Aedes japonicus	AR1	LM253-1	4	F2	9.78	2021-01-09	Ishikawa	Japan	36.5463	136.702	Ethanol	Adult
Aedes japonicus	AR2	LM253-2	4	F3	13.6	2021-01-09	Ishikawa	Japan	36.5463	136.702	Ethanol	Adult
Aedes japonicus	AR3	LM253-3	4	F4	9.96	2021-01-09	Ishikawa	Japan	36.5463	136.702	Ethanol	Adult
Aedes japonicus	AR4	LM253-4	4	F5	8.5	2021-01-09	Ishikawa	Japan	36.5463	136.702	Ethanol	Adult
Aedes japonicus	AR5	LM253-5	4	F6	8.35	2021-01-09	Ishikawa	Japan	36.5463	136.702	Ethanol	Adult
Aedes japonicus	AR6	LM253-6	4	F7	13.1	2021-01-09	Ishikawa	Japan	36.5463	136.702	Ethanol	Adult
Aedes japonicus	AR7	LM253-7	4	F8	12.2	2021-01-09	Ishikawa	Japan	36.5463	136.702	Ethanol	Adult
Aedes japonicus	AR8	LM253-8	4	F9	4.1	2021-01-09	Ishikawa	Japan	36.5463	136.702	Ethanol	Adult
Aedes japonicus	AR9	LM253-9	4	F10	9.18	2021-01-09	Ishikawa	Japan	36.5463	136.702	Ethanol	Adult
Aedes japonicus	AR10	LM253-10	4	G1	13.3	2021-01-09	Ishikawa	Japan	36.5463	136.702	Ethanol	Adult
Aedes japonicus	AR11	LM253-11	4	G2	9.13	2021-01-09	Ishikawa	Japan	36.5463	136.702	Ethanol	Adult
Aedes japonicus	AR12	LM253-12	4	G3	7.88	2021-01-09	Ishikawa	Japan	36.5463	136.702	Ethanol	Adult
Aedes japonicus	AR13	LM253-13	4	G4	11.9	2021-01-09	Ishikawa	Japan	36.5463	136.702	Ethanol	Adult
Aedes japonicus	AR14	LM253-14	4	G5	8.6	2021-01-09	Ishikawa	Japan	36.5463	136.702	Ethanol	Adult
Aedes japonicus	AR15	LM253-15	4	G6	6.08	2021-01-09	Ishikawa	Japan	36.5463	136.702	Ethanol	Adult
Aedes japonicus	AR16	LM253-16	4	G7	12.4	2021-01-09	Ishikawa	Japan	36.5463	136.702	Ethanol	Adult
Aedes japonicus	AR17	LM253-17	4	G8	7.33	2021-01-09	Ishikawa	Japan	36.5463	136.702	Ethanol	Adult
Aedes japonicus	AR18	LM253-18	4	G9	6.96	2021-01-09	Ishikawa	Japan	36.5463	136.702	Ethanol	Adult
Aedes japonicus	AR19	LM253-19	4	G10	5.96	2021-01-09	Ishikawa	Japan	36.5463	136.702	Ethanol	Adult
Aedes japonicus	AR20	LM253-20	4	H1	11.8	2021-01-09	Ishikawa	Japan	36.5463	136.702	Ethanol	Adult
Aedes japonicus	AR21	LM253-34	4	H2	3.23	2021-01-09	Ishikawa	Japan	36.5463	136.702	Ethanol	Adult
Aedes japonicus	AR22	LM253-35	4	H3	7.74	2021-01-09	Ishikawa	Japan	36.5463	136.702	Ethanol	Adult
Aedes japonicus	AR23	LM253-36	4	H4	6.71	2021-01-09	Ishikawa	Japan	36.5463	136.702	Ethanol	Adult
Aedes japonicus	AR24	LM253-37	4	H5	11	2021-01-09	Ishikawa	Japan	36.5463	136.702	Ethanol	Adult
Aedes japonicus	AR25	LM253-38	4	H6	17.3	2021-01-09	Ishikawa	Japan	36.5463	136.702	Ethanol	Adult
Aedes japonicus	AR26	LM253-39	4	H7	5.47	2021-01-09	Ishikawa	Japan	36.5463	136.702	Ethanol	Adult
Aedes japonicus	AR27	LM253-40	4	H8	4.84	2021-01-09	Ishikawa	Japan	36.5463	136.702	Ethanol	Adult
Aedes japonicus	AR28	LM253-41	4	H9	2.01	2021-01-09	Ishikawa	Japan	36.5463	136.702	Ethanol	Adult
Aedes japonicus	AS1	LM254-42	4	H10	7.74	2021-01-09	Sapporo	Japan	43.0748	141.34	Ethanol	Adult
Aedes japonicus	AS2	LM254-43	4	I1	5.85	2021-01-09	Sapporo	Japan	43.0748	141.34	Ethanol	Adult
Aedes japonicus	AS3	LM254-44	4	I2	13	2021-01-09	Sapporo	Japan	43.0748	141.34	Ethanol	Adult
Aedes japonicus	AS4	LM254-45	4	I3	7.27	2021-01-09	Sapporo	Japan	43.0748	141.34	Ethanol	Adult
Aedes japonicus	AS5	LM254-46	4	I4	9.03	2021-01-09	Sapporo	Japan	43.0748	141.34	Ethanol	Adult
Aedes japonicus	AS6	LM254-47	4	I5	19.9	2021-01-09	Sapporo	Japan	43.0748	141.34	Ethanol	Adult
Aedes japonicus	AS7	LM254-48	4	I6	7.84	2021-01-09	Sapporo	Japan	43.0748	141.34	Ethanol	Adult
Aedes japonicus	AS8	LM254-49	4	I7	9.76	2021-01-09	Sapporo	Japan	43.0748	141.34	Ethanol	Adult
Aedes japonicus	AS9	LM254-50	4	I8	14.6	2021-01-09	Sapporo	Japan	43.0748	141.34	Ethanol	Adult
Aedes japonicus	AS10	LM254-51	4	I9	12	2021-01-09	Sapporo	Japan	43.0748	141.34	Ethanol	Adult
Aedes japonicus	AS11	LM254-52	4	I10	12.2	2021-01-09	Sapporo	Japan	43.0748	141.34	Ethanol	Adult
Aedes japonicus	AS12	LM254-53	4	J1	13.9	2021-01-09	Sapporo	Japan	43.0748	141.34	Ethanol	Adult
Aedes japonicus	AS13	LM254-54	4	J2	19.8	2021-01-09	Sapporo	Japan	43.0748	141.34	Ethanol	Adult
Aedes japonicus	AS14	LM254-55	4	J3	9.3	2021-01-09	Sapporo	Japan	43.0748	141.34	Ethanol	Adult
Aedes japonicus	AS15	LM254-56	4	J4	10.6	2021-01-09	Sapporo	Japan	43.0748	141.34	Ethanol	Adult
Aedes japonicus	AS16	LM254-57	4	J5	12.6	2021-01-09	Sapporo	Japan	43.0748	141.34	Ethanol	Adult
Aedes japonicus	AS17	LM254-58	4	J6	17.1	2021-01-09	Sapporo	Japan	43.0748	141.34	Ethanol	Adult
Aedes japonicus	AS18	LM254-59	4	J7	15.3	2021-01-09	Sapporo	Japan	43.0748	141.34	Ethanol	Adult
Aedes japonicus	AS19	LM254-60	4	J8	8.71	2021-01-09	Sapporo	Japan	43.0748	141.34	Ethanol	Adult
Aedes japonicus	AS20	LM254-61	4	J9	14.5	2021-01-09	Sapporo	Japan	43.0748	141.34	Ethanol	Adult
Aedes japonicus		LM279-1	3	J6	2.18	2021-08-16	St. Louis, MO	USA	38.5262	-90.5618	Ethanol + 0C	Adult
Aedes japonicus		LM279-2	3	J7	6.49	2021-08-16	St. Louis, MO	USA	38.5262	-90.5618	Ethanol + 0C	Adult
Aedes japonicus		LM279-3	3	J8	2.86	2021-08-16	St. Louis, MO	USA	38.5262	-90.5618	Ethanol + 0C	Adult
Aedes japonicus		LM279-4	3	J9	6.87	2021-08-16	St. Louis, MO	USA	38.5262	-90.5618	Ethanol + 0C	Adult
Aedes japonicus		LM279-5	3	J10	10.9	2021-08-16	St. Louis, MO	USA	38.5262	-90.5618	Ethanol + 0C	Adult
Aedes japonicus		LM279-6	4	A1	3.03	2021-08-16	St. Louis, MO	USA	38.5262	-90.5618	Ethanol + 0C	Adult
Aedes japonicus		LM279-7	4	A2	5.75	2021-08-16	St. Louis, MO	USA	38.5262	-90.5618	Ethanol + 0C	Adult
Aedes japonicus		LM279-8	4	A3	2.02	2021-08-16	St. Louis, MO	USA	38.5262	-90.5618	Ethanol + 0C	Adult
Aedes japonicus		LM279-9	4	A4	3.07	2021-08-16	St. Louis, MO	USA	38.5262	-90.5618	Ethanol + 0C	Adult
Aedes japonicus		LM279-10	4	A5	3.65	2021-08-16	St. Louis, MO	USA	38.5262	-90.5618	Ethanol + 0C	Adult
Aedes japonicus		LM279-11	4	A6	6.26	2021-08-16	St. Louis, MO	USA	38.5262	-90.5618	Ethanol + 0C	Adult
Aedes japonicus		LM279-12	4	A7	10.5	2021-08-16	St. Louis, MO	USA	38.5262	-90.5618	Ethanol + 0C	Adult
Aedes japonicus		LM279-13	4	A8	4.5	2021-08-16	St. Louis, MO	USA	38.5262	-90.5618	Ethanol + 0C	Adult
Aedes japonicus		LM279-14	4	A9	9.04	2021-08-16	St. Louis, MO	USA	38.5262	-90.5618	Ethanol + 0C	Adult
Aedes japonicus		LM279-15	4	A10	10.1	2021-08-16	St. Louis, MO	USA	38.5262	-90.5618	Ethanol + 0C	Adult
Aedes japonicus		LM279-16	4	B1	6.92	2021-08-16	St. Louis, MO	USA	38.5262	-90.5618	Ethanol + 0C	Adult
Aedes japonicus		LM279-17	4	B2	7.74	2021-08-16	St. Louis, MO	USA	38.5262	-90.5618	Ethanol + 0C	Adult
Aedes japonicus		LM279-18	4	B3	6.65	2021-08-16	St. Louis, MO	USA	38.5262	-90.5618	Ethanol + 0C	Adult
Aedes japonicus		LM279-19	4	B4	3.66	2021-08-16	St. Louis, MO	USA	38.5262	-90.5618	Ethanol + 0C	Adult
Aedes japonicus		LM279-20	4	B5	6.31	2021-08-16	St. Louis, MO	USA	38.5262	-90.5618	Ethanol + 0C	Adult
Aedes japonicus		LM280-26	4	B6	5.83	2021-10-09	College Park, MD	USA	38.9897	-76.9378	Ethanol + 0C	Adult
Aedes japonicus		LM280-27	4	B7	6.49	2021-10-09	College Park, MD	USA	38.9897	-76.9378	Ethanol + 0C	Adult
Aedes japonicus		LM280-28	4	B8	7.75	2021-10-09	College Park, MD	USA	38.9897	-76.9378	Ethanol + 0C	Adult
Aedes japonicus		LM280-29	4	B9	5.32	2021-10-09	College Park, MD	USA	38.9897	-76.9378	Ethanol + 0C	Adult
Aedes japonicus		LM280-30	4	B10	5.62	2021-10-09	College Park, MD	USA	38.9897	-76.9378	Ethanol + 0C	Adult
Aedes japonicus		LM280-31	4	C1	6.16	2021-10-09	College Park, MD	USA	38.9897	-76.9378	Ethanol + 0C	Adult
Aedes japonicus		LM280-32	4	C2	4.98	2021-10-09	College Park, MD	USA	38.9897	-76.9378	Ethanol + 0C	Adult
Aedes japonicus		LM280-33	4	C3	1.27	2021-10-09	College Park, MD	USA	38.9897	-76.9378	Ethanol + 0C	Adult
Aedes japonicus		LM280-34	4	C4	1.35	2021-10-09	College Park, MD	USA	38.9897	-76.9378	Ethanol + 0C	Adult
Aedes japonicus		LM280-35	4	C5	too low	2021-10-09	College Park, MD	USA	38.9897	-76.9378	Ethanol + 0C	Adult
Aedes japonicus		LM280-36	4	C6	too low	2021-10-09	College Park, MD	USA	38.9897	-76.9378	Ethanol + 0C	Adult
Aedes japonicus		LM280-37	4	C7	too low	2021-10-09	College Park, MD	USA	38.9897	-76.9378	Ethanol + 0C	Adult
Aedes japonicus		LM280-38	4	C8	2.25	2021-10-09	College Park, MD	USA	38.9897	-76.9378	Ethanol + 0C	Adult
Aedes japonicus		LM280-39	4	C9	2.51	2021-10-09	College Park, MD	USA	38.9897	-76.9378	Ethanol + 0C	Adult
Aedes japonicus		LM280-40	4	C10	1.09	2021-10-09	College Park, MD	USA	38.9897	-76.9378	Ethanol + 0C	Adult
Aedes japonicus		LM280-41	4	D1	1.37	2021-10-09	College Park, MD	USA	38.9897	-76.9378	Ethanol + 0C	Adult
Aedes japonicus		LM281-1	4	J10	9.86	2022-06-10	Attimis	Italy	46.1981	13.2344	Ethanol	Adult
Aedes japonicus		LM281-2	5	A1	19.2	2022-06-10	Attimis	Italy	46.1981	13.2344	Ethanol	Adult
Aedes japonicus		LM281-3	5	A2	9.89	2022-06-10	Attimis	Italy	46.1981	13.2344	Ethanol	Adult
Aedes japonicus		LM281-4	5	A3	11.9	2022-06-10	Attimis	Italy	46.1981	13.2344	Ethanol	Adult
Aedes japonicus		LM281-5	5	A4	10.2	2022-06-10	Attimis	Italy	46.1981	13.2344	Ethanol	Adult
Aedes japonicus		LM281-6	5	A5	18.9	2022-06-10	Attimis	Italy	46.1981	13.2344	Ethanol	Adult
Aedes japonicus		LM281-7	5	A6	15.1	2022-06-10	Attimis	Italy	46.1981	13.2344	Ethanol	Adult
Aedes japonicus		LM281-8	5	A7	13.4	2022-06-10	Attimis	Italy	46.1981	13.2344	Ethanol	Adult
Aedes japonicus		LM281-9	5	A8	12.9	2022-06-10	Attimis	Italy	46.1981	13.2344	Ethanol	Adult
Aedes japonicus		LM281-10	5	A9	11.7	2022-06-10	Attimis	Italy	46.1981	13.2344	Ethanol	Adult
Aedes japonicus		LM282-1	5	A10	10.5	2022-06-10	Attimis	Italy	46.1981	13.2344	Ethanol	Adult
Aedes japonicus		LM282-2	5	B1	9.22	2022-06-10	Attimis	Italy	46.1981	13.2344	Ethanol	Adult
Aedes japonicus		LM282-3	5	B2	9.82	2022-06-10	Attimis	Italy	46.1981	13.2344	Ethanol	Adult
Aedes japonicus		LM282-4	5	B3	8.51	2022-06-10	Attimis	Italy	46.1981	13.2344	Ethanol	Adult
Aedes japonicus		LM282-5	5	B4	13.4	2022-06-10	Attimis	Italy	46.1981	13.2344	Ethanol	Adult
Aedes japonicus		LM282-6	5	B5	10.6	2022-06-10	Attimis	Italy	46.1981	13.2344	Ethanol	Adult
Aedes japonicus		LM282-7	5	B6	6.97	2022-06-10	Attimis	Italy	46.1981	13.2344	Ethanol	Adult
Aedes japonicus		LM282-8	5	B7	12.1	2022-06-10	Attimis	Italy	46.1981	13.2344	Ethanol	Adult
Aedes japonicus		LM282-9	5	B8	6.65	2022-06-10	Attimis	Italy	46.1981	13.2344	Ethanol	Adult
Aedes japonicus		LM282-10	5	B9	10.8	2022-06-10	Attimis	Italy	46.1981	13.2344	Ethanol	Adult
Aedes japonicus		LM283-1	5	B10	16.5	2022-06-08	Clauzetto	Italy	46.2412	12.9058	Ethanol	Larva
Aedes japonicus		LM283-2	5	C1	2.06	2022-06-08	Clauzetto	Italy	46.2412	12.9058	Ethanol	Larva
Aedes japonicus		LM283-3	5	C2	6.52	2022-06-08	Clauzetto	Italy	46.2412	12.9058	Ethanol	Larva
Aedes japonicus		LM283-4	5	C3	7.02	2022-06-08	Clauzetto	Italy	46.2412	12.9058	Ethanol	Larva
Aedes japonicus		LM283-5	5	C4	1.71	2022-06-08	Clauzetto	Italy	46.2412	12.9058	Ethanol	Larva
Aedes japonicus		LM283-6	5	C5	7.76	2022-06-08	Clauzetto	Italy	46.2412	12.9058	Ethanol	Larva
Aedes japonicus		LM283-7	5	C6	3.02	2022-06-08	Clauzetto	Italy	46.2412	12.9058	Ethanol	Larva
Aedes japonicus		LM283-8	5	C7	12.5	2022-06-08	Clauzetto	Italy	46.2412	12.9058	Ethanol	Larva
Aedes japonicus		LM283-9	5	C8	3.84	2022-06-08	Clauzetto	Italy	46.2412	12.9058	Ethanol	Larva
Aedes japonicus		LM283-10	5	C9	13.1	2022-06-08	Clauzetto	Italy	46.2412	12.9058	Ethanol	Larva
Aedes japonicus		LM283-11	5	C10	7.32	2022-06-08	Clauzetto	Italy	46.2412	12.9058	Ethanol	Larva
Aedes japonicus		LM283-12	5	D1	3.3	2022-06-08	Clauzetto	Italy	46.2412	12.9058	Ethanol	Larva
Aedes japonicus		LM283-13	5	D2	2.56	2022-06-08	Clauzetto	Italy	46.2412	12.9058	Ethanol	Larva
Aedes japonicus		LM283-14	5	D3	6.72	2022-06-08	Clauzetto	Italy	46.2412	12.9058	Ethanol	Larva
Aedes japonicus		LM283-15	5	D4	4.44	2022-06-08	Clauzetto	Italy	46.2412	12.9058	Ethanol	Larva
Aedes japonicus		LM283-16	5	D5	11.6	2022-06-08	Clauzetto	Italy	46.2412	12.9058	Ethanol	Larva
Aedes japonicus		LM283-17	5	D6	11	2022-06-08	Clauzetto	Italy	46.2412	12.9058	Ethanol	Larva
Aedes japonicus		LM283-18	5	D7	6.44	2022-06-08	Clauzetto	Italy	46.2412	12.9058	Ethanol	Larva
Aedes japonicus		LM283-19	5	D8	9.32	2022-06-08	Clauzetto	Italy	46.2412	12.9058	Ethanol	Larva
Aedes japonicus		LM283-20	5	D9	5.46	2022-06-08	Clauzetto	Italy	46.2412	12.9058	Ethanol	Larva
Aedes japonicus		LM284-1	5	D10	3.82	2022-06-08	Clauzetto	Italy	46.2283	12.918	Ethanol	Larva
Aedes japonicus		LM284-2	5	E1	2.93	2022-06-08	Clauzetto	Italy	46.2283	12.918	Ethanol	Larva
Aedes japonicus		LM284-3	5	E2	4.73	2022-06-08	Clauzetto	Italy	46.2283	12.918	Ethanol	Larva
Aedes japonicus		LM284-4	5	E3	2.87	2022-06-08	Clauzetto	Italy	46.2283	12.918	Ethanol	Larva
Aedes japonicus		LM284-5	5	E4	2.94	2022-06-08	Clauzetto	Italy	46.2283	12.918	Ethanol	Larva
Aedes japonicus		LM285-1	5	E5	1.93	2022-06-08	Travesio	Italy	46.1907	12.8705	Ethanol	Larva
Aedes japonicus		LM285-2	5	E6	1.65	2022-06-08	Travesio	Italy	46.1907	12.8705	Ethanol	Larva
Aedes japonicus		LM285-3	5	E7	too low	2022-06-08	Travesio	Italy	46.1907	12.8705	Ethanol	Larva
Aedes japonicus		LM285-4	5	E8	1.61	2022-06-08	Travesio	Italy	46.1907	12.8705	Ethanol	Larva
Aedes albopictus		HMIP330B	6	A1	1.02	2022-06-05	Barcelona	Spain			Lysis buffer	Adult
Aedes albopictus		HMIP331B	6	A2	too low	2022-06-05	Barcelona	Spain			Lysis buffer	Adult
Aedes albopictus		HMIP332B	6	A3	1.34	2022-06-05	Barcelona	Spain			Lysis buffer	Adult
Aedes albopictus		HMIP333B	6	A4	7.02	2022-06-13	Blanes	Spain	41.6768	2.80272		Adult
Aedes albopictus		HMIP334B	6	A5	too low	2022-06-21	Blanes	Spain	41.6757	2.79375		Adult
Aedes albopictus		HMIP335B	6	A6	too low	2022-06-29	Lloret de Mar	Spain	41.7013	2.83533		Adult
Aedes albopictus		HMIP336B	6	A7	2.6	2022-09-24	Blanes	Spain	41.6757	2.79375	Lysis buffer	Adult
Aedes albopictus		HMIP337B	6	A8	5.1	2022-09-24	Blanes	Spain	41.6757	2.79375	Lysis buffer	Adult
Aedes albopictus		HMIP348B	6	A9	1.04	2022-09-20	Barcelona	Spain	41.3824	2.155	Lysis buffer	Adult
Aedes albopictus		HMIP349B	6	A10	too low	2022-09-20	Barcelona	Spain	41.3824	2.155	Lysis buffer	Adult
Aedes albopictus		HMIP350B	6	B1	too low	2022-09-20	Barcelona	Spain	41.3824	2.155	Lysis buffer	Adult
Aedes albopictus		HMIP351B	6	B2	1.06	2022-09-20	Barcelona	Spain	41.3824	2.155	Lysis buffer	Adult
Aedes albopictus		HMIP352B	6	B3	too low	2022-09-20	Barcelona	Spain	41.3824	2.155	Lysis buffer	Adult
Aedes albopictus		HMIP353B	6	B4	1.97	2022-09-06	Badalona	Spain	41.4555	2.25413	Lysis buffer	Adult
Aedes albopictus		HMIP354B	6	B5	too low	2022-09-06	Badalona	Spain	41.4555	2.25413	Lysis buffer	Adult
Aedes albopictus		HMIP355B	6	B6	1.31	2022-09-06	Badalona	Spain	41.4555	2.25413	Lysis buffer	Adult
Aedes albopictus		HMIP356B	6	B7	too low	2022-09-06	Badalona	Spain	41.4555	2.25413	Lysis buffer	Adult
Aedes albopictus		HMIP357B	6	B8	too low	2022-09-06	Badalona	Spain	41.4555	2.25413	Lysis buffer	Adult
Aedes albopictus		HMIP358B	6	B9	too low	2022-09-06	Badalona	Spain	41.4555	2.25413	Lysis buffer	Adult
Aedes albopictus		HMIP359B	6	B10	too low	2022-09-06	Badalona	Spain	41.4555	2.25413	Lysis buffer	Adult
Aedes albopictus		HMIP360B	6	C1	too low	2022-09-06	Badalona	Spain	41.4555	2.25413	Lysis buffer	Adult
Aedes albopictus		HMIP361B	6	C2	too low	2022-09-10	Badalona	Spain	41.4555	2.25413	Lysis buffer	Adult
Aedes albopictus		HMIP362B	6	C3	too low	2022-09-10	Badalona	Spain	41.4555	2.25413	Lysis buffer	Adult
Aedes albopictus		HMIP363B	6	C4	too low	2022-09-10	Badalona	Spain	41.4555	2.25413	Lysis buffer	Adult
Aedes albopictus		351B	6	C5	1.44	2017-10-04	Molins de Rei	Spain	41.4119	2.02312	Absolute ethanol	Adult
Aedes albopictus		354B	6	C6	1.43	2017-10-05	Molins de Rei	Spain	41.4119	2.02312	Absolute ethanol	Adult
Aedes albopictus		360B	6	C7	too low	2017-10-05	Molins de Rei	Spain	41.4119	2.02312	Absolute ethanol	Adult
Aedes albopictus		363B	6	C8	2.87	2017-10-09	Molins de Rei	Spain	41.4119	2.02312	Absolute ethanol	Adult
Aedes albopictus		366B	6	C9	1.07	2017-10-10	Molins de Rei	Spain	41.4119	2.02312	Absolute ethanol	Adult
Aedes albopictus		367B	6	C10	too low	2017-10-10	Molins de Rei	Spain	41.4119	2.02312	Absolute ethanol	Adult
Aedes albopictus		380B	6	D1	too low	2017-10-16	Molins de Rei	Spain	41.4119	2.02312	Absolute ethanol	Adult
Aedes albopictus		382B	6	D2	1.65	2017-10-16	Molins de Rei	Spain	41.4119	2.02312	Absolute ethanol	Adult
Aedes albopictus		394B	6	D3	1.37	2017-10-17	Molins de Rei	Spain	41.4119	2.02312	Absolute ethanol	Adult
Aedes albopictus		395B	6	D4	too low	2017-10-17	Molins de Rei	Spain	41.4119	2.02312	Absolute ethanol	Adult
Aedes albopictus		406B	6	D5	too low	2017-10-17	Molins de Rei	Spain	41.4119	2.02312	Absolute ethanol	Adult
Aedes albopictus		409B	6	D6	1.69	2017-10-18	Molins de Rei	Spain	41.4119	2.02312	Absolute ethanol	Adult
Aedes albopictus		410B	6	D7	1.55	2017-10-18	Molins de Rei	Spain	41.4119	2.02312	Absolute ethanol	Adult
Aedes albopictus		414B	6	D8	too low	2017-10-18	Molins de Rei	Spain	41.4119	2.02312	Absolute ethanol	Adult
Aedes albopictus		415B	6	D9	2.06	2017-10-18	Molins de Rei	Spain	41.4119	2.02312	Absolute ethanol	Adult
Aedes albopictus		420B	6	D10	3.84	2017-10-18	Molins de Rei	Spain	41.4119	2.02312	Absolute ethanol	Adult
Aedes albopictus		421B	6	E1	1.04	2017-10-18	Molins de Rei	Spain	41.4119	2.02312	Absolute ethanol	Adult
Aedes albopictus		432B	6	E2	too low	2017-10-23	Molins de Rei	Spain	41.4119	2.02312	Absolute ethanol	Adult
Aedes albopictus		436B	6	E3	too low	2017-10-23	Molins de Rei	Spain	41.4119	2.02312	Absolute ethanol	Adult
Aedes albopictus		440B	6	E4	too low	2017-10-23	Molins de Rei	Spain	41.4119	2.02312	Absolute ethanol	Adult
Aedes albopictus		446B	6	E5	1.14	2017-10-24	Molins de Rei	Spain	41.4119	2.02312	Absolute ethanol	Adult
Aedes albopictus		447B	6	E6	1.28	2017-10-24	Molins de Rei	Spain	41.4119	2.02312	Absolute ethanol	Adult
Aedes albopictus		452B	6	E7	1.23	2017-10-25	Molins de Rei	Spain	41.4119	2.02312	Absolute ethanol	Adult
Aedes albopictus		456B	6	E8	1.39	2017-10-30	Molins de Rei	Spain	41.4119	2.02312	Absolute ethanol	Adult
Aedes albopictus		463B	6	E9	too low	2017-10-30	Molins de Rei	Spain	41.4119	2.02312	Absolute ethanol	Adult
Aedes albopictus		469B	6	E10	too low	2017-10-31	Molins de Rei	Spain	41.4119	2.02312	Absolute ethanol	Adult
Aedes albopictus		475B	6	F1	1.52	2017-10-31	Molins de Rei	Spain	41.4119	2.02312	Absolute ethanol	Adult
Aedes albopictus		478B	6	F2	1.99	2017-11-06	Molins de Rei	Spain	41.4119	2.02312	Absolute ethanol	Adult
Aedes albopictus		481B	6	F3	1.7	2017-11-06	Molins de Rei	Spain	41.4119	2.02312	Absolute ethanol	Adult
Aedes albopictus		483B	6	F4	too low	2017-11-07	Molins de Rei	Spain	41.4119	2.02312	Absolute ethanol	Adult
Aedes albopictus		899B	6	F5	3.66	2017-10-19	Molins de Rei	Spain	41.4119	2.02312	Absolute ethanol	Larva
Aedes albopictus		900B	6	F6	3.16	2017-10-19	Molins de Rei	Spain	41.4119	2.02312	Absolute ethanol	Larva
Aedes albopictus		904B	6	F7	2.11	2017-10-19	Molins de Rei	Spain	41.4119	2.02312	Absolute ethanol	Larva
Aedes albopictus		907B	6	F8	4.47	2017-10-19	Molins de Rei	Spain	41.4119	2.02312	Absolute ethanol	Larva
Aedes albopictus		910B	6	F9	4.04	2017-10-11	Molins de Rei	Spain	41.4119	2.02312	Absolute ethanol	Larva
Aedes albopictus		912B	6	F10	3.17	2017-10-11	Molins de Rei	Spain	41.4119	2.02312	Absolute ethanol	Larva
Aedes albopictus		913B	6	G1	2.48	2017-10-11	Molins de Rei	Spain	41.4119	2.02312	Absolute ethanol	Larva
Aedes albopictus		919B	6	G2	3.19	2017-10-11	Molins de Rei	Spain	41.4119	2.02312	Absolute ethanol	Larva
Aedes albopictus		950B	6	G3	2.84	2017-07-27	Molins de Rei	Spain	41.4119	2.02312	Absolute ethanol	Larva
Aedes albopictus		956B	6	G4	1.05	2017-08-31	Molins de Rei	Spain	41.4119	2.02312	Absolute ethanol	Larva
Aedes albopictus		957B	6	G5	2.1	2017-08-31	Molins de Rei	Spain	41.4119	2.02312	Absolute ethanol	Larva
Aedes albopictus		959B	6	G6	3.27	2017-08-31	Molins de Rei	Spain	41.4119	2.02312	Absolute ethanol	Larva
Aedes albopictus		960B	6	G7	too low	2017-08-31	Molins de Rei	Spain	41.4119	2.02312	Absolute ethanol	Larva
Aedes albopictus		962B	6	G8	3.28	2017-08-31	Molins de Rei	Spain	41.4119	2.02312	Absolute ethanol	Larva
Aedes albopictus		963B	6	G9	2.14	2017-08-31	Molins de Rei	Spain	41.4119	2.02312	Absolute ethanol	Larva
Aedes albopictus		965B	6	G10	4.65	2017-09-07	Molins de Rei	Spain	41.4119	2.02312	Absolute ethanol	Larva
Aedes albopictus		967B	6	H1	7.7	2017-09-07	Molins de Rei	Spain	41.4119	2.02312	Absolute ethanol	Larva
Aedes albopictus		968B	6	H2	2.7	2017-09-07	Molins de Rei	Spain	41.4119	2.02312	Absolute ethanol	Larva
Aedes albopictus		977B	6	H3	2.1	2017-09-14	Molins de Rei	Spain	41.4119	2.02312	Absolute ethanol	Larva
Aedes albopictus		979B	6	H4	too low	2017-09-14	Molins de Rei	Spain	41.4119	2.02312	Absolute ethanol	Larva
Aedes albopictus		986B	6	H5	4.34	2017-09-14	Molins de Rei	Spain	41.4119	2.02312	Absolute ethanol	Larva
Aedes albopictus		1017B	6	H6	1.25	2017-09-29	Molins de Rei	Spain	41.4119	2.02312	Absolute ethanol	Larva
Aedes albopictus		1020B	6	H7	1.75	2017-09-29	Molins de Rei	Spain	41.4119	2.02312	Absolute ethanol	Larva
Aedes albopictus		1022B	6	H8	5.71	2017-09-29	Molins de Rei	Spain	41.4119	2.02312	Absolute ethanol	Larva
Aedes albopictus		1030B	6	H9	1.52	2017-10-06	Molins de Rei	Spain	41.4119	2.02312	Absolute ethanol	Larva
Aedes albopictus		1036B	6	H10	2.8	2017-10-06	Molins de Rei	Spain	41.4119	2.02312	Absolute ethanol	Larva
Aedes albopictus		1038B	6	I1	too low	2017-10-06	Molins de Rei	Spain	41.4119	2.02312	Absolute ethanol	Larva
Aedes albopictus		1042B	6	I2	too low	2017-10-11	Molins de Rei	Spain	41.4119	2.02312	Absolute ethanol	Larva
Aedes albopictus		1045B	6	I3	too low	2017-10-11	Molins de Rei	Spain	41.4119	2.02312	Absolute ethanol	Larva
Aedes albopictus		1046B	6	I4	2.78	2017-10-11	Molins de Rei	Spain	41.4119	2.02312	Absolute ethanol	Larva
Aedes albopictus		1047B	6	I5	1.74	2017-10-11	Molins de Rei	Spain	41.4119	2.02312	Absolute ethanol	Larva
Aedes albopictus		1050B	6	I6	2.48	2017-10-11	Molins de Rei	Spain	41.4119	2.02312	Absolute ethanol	Larva
Aedes albopictus		1051B	6	I7	4.37	2017-10-11	Molins de Rei	Spain	41.4119	2.02312	Absolute ethanol	Larva
Aedes albopictus		1055B	6	I8	too low	2017-10-26	Molins de Rei	Spain	41.4119	2.02312	Absolute ethanol	Larva
Aedes albopictus		1079B	6	I9	1.51	2017-10-26	Molins de Rei	Spain	41.4119	2.02312	Absolute ethanol	Larva
Aedes albopictus		1095B	6	I10	3.7	2017-10-27	Molins de Rei	Spain	41.4119	2.02312	Absolute ethanol	Larva
Aedes albopictus		1098B	6	J1	1.28	2017-10-27	Molins de Rei	Spain	41.4119	2.02312	Absolute ethanol	Larva
Aedes albopictus		1102B	6	J2	too low	2017-10-27	Molins de Rei	Spain	41.4119	2.02312	Absolute ethanol	Larva
Aedes albopictus		1103B	6	J3	1.56	2017-10-27	Molins de Rei	Spain	41.4119	2.02312	Absolute ethanol	Larva
Aedes albopictus		1105B	6	J4	1.3	2017-10-27	Molins de Rei	Spain	41.4119	2.02312	Absolute ethanol	Larva
Aedes albopictus		1113B	6	J5	1.39	2017-11-02	Molins de Rei	Spain	41.4119	2.02312	Absolute ethanol	Larva
Aedes albopictus		1114B	6	J6	too low	2017-11-02	Molins de Rei	Spain	41.4119	2.02312	Absolute ethanol	Larva
Aedes albopictus		1116B	6	J7	1.48	2017-11-02	Molins de Rei	Spain	41.4119	2.02312	Absolute ethanol	Larva
Aedes albopictus		1122B	6	J8	1.39	2017-11-02	Molins de Rei	Spain	41.4119	2.02312	Absolute ethanol	Larva
Aedes albopictus		1127B	6	J9	too low	2017-11-02	Molins de Rei	Spain	41.4119	2.02312	Absolute ethanol	Larva
Aedes albopictus		1130B	6	J10	4.6	2017-11-03	Molins de Rei	Spain	41.4119	2.02312	Absolute ethanol	Larva
