# Supplementary material for: Mosquito bacterial communities show stage-specific patterns relevant for vector ecology and AMR surveillance
Source: Research Square preprint supplement (doi:10.21203/rs.3.rs-7544775/v1), 2025-10-09
Supplement: Supplementary file 2 [file 260cb1eacd1e8d160c5d293a.xlsx]

## Sheet: Sheet1
Factor	Df	SumOfSqs	MeanSqs	F	R2	Pr(>F)
Species	1	10.2577	10.2577	39.7287	0.0614169	0.0001
Stage	2	11.4764	5.7382	22.2244	0.0687136	0.0001
Location	6	17.8336	2.97227	11.5118	0.106777	0.0001
Residual	489	126.257	0.258194		0.755949
Total	498	167.018	0.335377		1
