# Supplementary material for: Mosquito bacterial communities show stage-specific patterns relevant for vector ecology and AMR surveillance
Source: Research Square preprint supplement (doi:10.21203/rs.3.rs-7544775/v1), 2025-10-09
Supplement: Supplementary file 3 [file d5c13368d6f36a9225e52867.xlsx]

## Sheet: Sheet1
Diversity indices of the bacterial communities between countries
Country	Chao1 Index	Shannon Index	Simpson Index	Inverse Simpson Index	Evenness Index
Netherlands	336	4.56931	0.975717	41.1805	0.785494
Japan	540	4.61302	0.972547	36.4259	0.733206
Austria	127	3.4713	0.950405	20.1633	0.716591
Hungary	342	4.09414	0.960842	25.5373	0.701675
Italy	299	3.98096	0.95944	24.6547	0.69836
France	205	3.69181	0.937254	15.9372	0.693557
Spain	789	4.39724	0.968106	31.3541	0.659181
USA	310	3.72402	0.926524	13.6098	0.649172
Diversity indices of the bacterial communities between the two mosquito species from Spain
Mosquito Species	Chao1 Index	Shannon Index	Simpson Index	Inverse Simpson Index	Evenness Index
Aedes japonicus	687	4.91404	0.984607	64.9642	0.752264
Aedes albopictus	411	4.3646	0.976012	41.6871	0.725186
Diversity indices of the bacterial communities between the two mosquito developmental stages (whenever the tow stages where available - see Table 1 and Table S1 for details)
Developmental stage	Chao1 Index	Shannon Index	Simpson Index	Inverse Simpson Index	Evenness Index
Larvae	398	6.26784	0.971172	34.6889	1.047
Adults	924	6.56622	0.97041	33.7952	0.96156
