# Supplementary material for: Mosquito bacterial communities show stage-specific patterns relevant for vector ecology and AMR surveillance
Source: Research Square preprint supplement (doi:10.21203/rs.3.rs-7544775/v1), 2025-10-09
Supplement: Supplementary file 4 [file fca0a33557f6a93352ef9b62.xlsx]

## Sheet: France
Larvae only	Adults only	Shared
Beijerinckia	03196G20	3713
Bosea	1124	Acidovorax
Citrifermentans	117490112	Acinetobacter
Dechloromonas	A4b	Aeromonas
IMCC26207	Abiotrophia	AllorhizobiumNeorhizobiumPararhizobiumRhizobium
Iamia	AbsconditabacterialesSR1	Altererythrobacter
Kaistia	Acetobacterium	Ancylobacter
Lacihabitans	Acidibacter	Arcicella
Lactococcus	Aerococcus	Arenimonas
LiUU11161	Alcanivorax	Bdellovibrio
Mesorhizobium	Algoriphagus	Blfdi19
NS9marinegroup	Anaerococcus	Brevundimonas
Prosthecobacter	Aquabacterium	Caulobacter
Pseudoxanthomonas	Atopobium	Chloroplast
R7C24	Aurantimicrobium	Chryseobacterium
Rubellimicrobium	Babeliales	Clostridiumsensustricto1
Runella	Bacillus	Cutibacterium
SM2D12	Bacteriovorax	Devosia
Serratia	Bacteroides	Edaphobaculum
Sphingorhabdus	BacteroidetesVC2.1Bac22	Emticicia
Terrimonas	Blastocatella	Enterobacter
	Brachybacterium	Ferruginibacter
	Brevibacterium	Flavobacterium
	Bryobacter	Fluviicola
	C39	GKS98freshwatergroup
	CL50029marinegroup	Gemmatimonas
	Campylobacter	Hydrogenophaga
	CandidatusBacilloplasma	Iodobacter
	CandidatusMegaira	Janthinobacterium
	CandidatusPeribacteria	Limnobacter
	CandidatusPlanktoluna	Limnohabitans
	CandidatusStoquefichus	Methylophilus
	Cellvibrio	Methylotenera
	Cloacibacterium	Mitochondria
	Collimonas	Mycobacterium
	Commensalibacter	NS1112marinegroup
	Corynebacterium	Nevskia
	Coxiella	Novosphingobium
	Curvibacter	OM27clade
	Cytophaga	P3OB42
	DEV007	Paucibacter
	Delftia	Pedobacter
	Dialister	Peredibacter
	Diptera	Phaselicystis
	Dongia	Polaromonas
	Duganella	Pseudomonas
	Elstera	Pseudorhodobacter
	Enhydrobacter	Rhizobacter
	Exiguobacterium	Rhodobacter
	Fenollaria	Rhodoferax
	Finegoldia	Roseococcus
	Gracilibacteria	Roseomonas
	Haemophilus	SAR324cladeMarinegroupB
	Herbaspirillum	Saccharimonadales
	Hirschia	Sphingopyxis
	Hyphomicrobium	Spirosoma
	JG30KFCM45	Stenotrophomonas
	Janibacter	Terrimicrobium
	Ketobacter	Unassigned
	LWQ8	Undibacterium
	Lactobacillus	Variovorax
	Lawsonella	Vicinamibacteraceae
	Legionella	env.OPS17
	LeptolyngbyaPCC6306	uncultured
	Leptothrix
	Longimicrobiaceae
	Marinomonas
	Megasphaera
	Methylobacillus
	MethylobacteriumMethylorubrum
	Methyloversatilis
	Mycoplasma
	Nocardia
	Nocardioides
	OLB8
	OM60NOR5clade
	Opitutus
	Pajaroellobacter
	Paludibacter
	Pannonibacter
	Pantoea
	Paracoccus
	Pectobacterium
	Pelomonas
	Peptoclostridium
	Peptoniphilus
	Phreatobacter
	Polynucleobacter
	Prevotella
	Prosthecomicrobium
	Pseudarcicella
	Pseudonocardia
	Reyranella
	Rheinheimera
	Rhodococcus
	Rhodoluna
	Romboutsia
	Roseisolibacter
	Ruminiclostridium
	Rurimicrobium
	SCGCAAA011D5
	SWB02
	Sericytochromatia
	Shewanella
	Silvanigrella
	Sphingobium
	Sphingomonas
	Staphylococcus
	Streptococcus
	Streptomyces
	Sulfurifustis
	Sva0996marinegroup
	TM7x
	Terasakiella
	Thermomonas
	Thiopseudomonas
	Turneriella
	UKL131
	UnknownFamily
	Varibaculum
	Veillonella
	Vogesella
	Xanthomonas
	hgcIclade
	mle127

## Sheet: Hungary
Larvae only	Adults only	Shared
A4b	1124	03196G20
Acetobacterium	117490112	6714
Acidibacter	AAP99	Acidovorax
Afipia	AbsconditabacterialesSR1	Acinetobacter
Agitococcuslubricusgroup	Acetoanaerobium	Aeromonas
Anaerosinus	Acidaminobacter	Alkanindiges
Anaerosporomusa	Acidiphilium	AllorhizobiumNeorhizobiumPararhizobiumRhizobium
Arcobacter	Actinomycetospora	Altererythrobacter
Asaia	Aeromicrobium	Amaricoccus
Aurantisolimonas	Agromyces	Ancylobacter
Azonexus	Alcanivorax	Aquabacterium
Azospira	Algoriphagus	Arcicella
Azospirillum	Aliihoeflea	Aurantimicrobium
BacteroidetesVC2.1Bac22	Alistipes	Bacillus
Beijerinckia	Alloprevotella	Bacteriovorax
C39	Aquicella	Bacteroides
Camelimonas	Aquimonas	Bdellovibrio
CandidatusAccumulibacter	Arenimonas	Blastomonas
CandidatusChloroploca	Aureimonas	Blfdi19
Caulobacter	B17BS	Bosea
Cellulomonas	BacteroidetesBD22	Brevundimonas
Cellvibrio	Brachybacterium	Bryobacter
Chitinibacter	Bradymonadales	CL50029marinegroup
Chitinimonas	Bradyrhizobium	Chloroplast
Chthoniobacter	Caenimonas	ChristensenellaceaeR7group
Clavibacter	CandidatusPeribacteria	Chryseobacterium
Clostridiumsensustricto1	CandidatusSaccharimonas	Cloacibacterium
Clostridiumsensustricto10	CandidatusWoesebacteria	Clostridiumsensustricto13
Clostridiumsensustricto9	Chryseomicrobium	Corynebacterium
Comamonas	Clostridiumsensustricto18	Cutibacterium
Curvibacter	Conchiformibius	Dechloromonas
Cytophaga	Conexibacter	Delftia
Dechlorobacter	Crenothrix	Devosia
Desulfovibrio	Crocinitomix	Dyadobacter
Dinghuibacter	D052	Dysgonomonas
Dongia	DSSD61	Edaphobaculum
Fibrobacter	Dolosigranulum	Emticicia
Finegoldia	Duganella	Enhydrobacter
Flectobacillus	Egicoccus	Ferribacterium
Fonticella	Enterobacter	Ferruginibacter
GKS98freshwatergroup	Epulopiscium	Flavobacterium
Gardnerella	EscherichiaShigella	Fluviicola
Gordonibacter	Euzebya	Fusibacter
Haematobacter	Exiguobacterium	Gastranaerophilales
HafniaObesumbacterium	Filifactor	Gemmatimonas
Haliangium	Flavihumibacter	Hirschia
IMCC26207	Flavisolibacter	Hydrogenophaga
Ignatzschineria	Fontimonas	Hyphomicrobium
Ilumatobacter	Fusobacterium	Iamia
JGI0001001H03	Gemella	Inhella
KD310	Gilliamella	JG30KFCM45
Kaistia	GittGS136	Kocuria
LWQ8	Glutamicibacter	Lacibacter
Lactobacillus	Gracilibacteria	Lacihabitans
Lacunisphaera	Granulicatella	Lautropia
Leifsonia	Haemophilus	Legionella
Leptothrix	Haliscomenobacter	Lentimicrobium
Longivirga	Hydrocarboniphaga	Leucobacter
Macellibacteroides	Hymenobacter	Limnobacter
Methylocystis	Hyphomonas	Limnohabitans
Methylomonas	Janibacter	Massilia
Morganella	KD496	Mesorhizobium
Nannocystis	KI89Aclade	Methylophilus
Niveispirillum	Kluyvera	Methylotenera
NostocPCC8976	Knoellia	Mitochondria
Novispirillum	Lawsonella	Mucilaginibacter
OPB41	Luteolibacter	Mycobacterium
PHOSHE36	Magnetospirillum	NS1112marinegroup
Paludibacter	Maribacter	NS9marinegroup
Paludibaculum	Marmoricola	Nevskia
Paludisphaera	MethylobacteriumMethylorubrum	Nocardiopsis
Paraclostridium	Methylophaga	Novosphingobium
Parafrigoribacterium	Methylopila	P3OB42
PeM15	Methyloversatilis	Paucibacter
Pelosinus	Microbulbifer	Pedobacter
Phaeospirillum	Micrococcus	Peptoniphilus
Pleomorphomonas	Microvirga	Phaselicystis
Psychrobacter	Moraxella	Phenylobacterium
Raoultibacter	Myceligenerans	Phreatobacter
Rhodoblastus	Niabella	Polynucleobacter
Rhodoplanes	Nitrosomonas	Prevotella
Rhodopseudomonas	Nocardioides	Prosthecobacter
Roseomonas	Olsenella	Pseudarcicella
Ruminiclostridium	Ornithinimicrobium	Pseudomonas
Runella	PAUC26f	Pseudorhodobacter
Rurimicrobium	Paenibacillus	Pseudoxanthomonas
SJA15	Pajaroellobacter	R7C24
Sandaracinobacter	Pantoea	Reyranella
Sandarakinorhabdus	Paracoccus	Rheinheimera
Sulfurospirillum	Parcubacteria	Rhizobacter
Tabrizicola	Pelomonas	Rhodobacter
Taibaiella	Peredibacter	Rhodococcus
Terrimicrobium	Phycicoccus	Rhodoferax
Terrisporobacter	Planococcus	Roseisolibacter
Trichococcus	Polaromonas	Roseococcus
UBA12409	Polycyclovorans	Rubellimicrobium
Vibrio	Polymorphobacter	Rudanella
WCHB132	Porphyrobacter	SM2D12
Weissella	Porphyromonas	Saccharimonadales
Xanthobacter	Promicromonospora	Shinella
alphaIcluster	Pseudarthrobacter	Sphingobium
	Pseudoclavibacter	Sphingomonas
	Pseudohongiella	Sphingopyxis
	Pseudonocardia	Sphingorhabdus
	Ralstonia	Staphylococcus
	Ramlibacter	Stenotrophomonas
	Rathayibacter	Streptococcus
	Rhodoluna	Terrimonas
	Romboutsia	Unassigned
	Roseicyclus	Undibacterium
	Sandaracinus	Vicinamibacteraceae
	Sanguibacter	Yersinia
	Sediminibacterium	Zoogloea
	Selenomonas	env.OPS17
	Sericytochromatia	uncultured
	Silvanigrella
	Skermanella
	Solirubrobacter
	Sphaerotilus
	Sphingobacterium
	Sporichthya
	Sulfitobacter
	Sulfuricurvum
	SynechococcusCC9902
	Truepera
	Tsukamurella
	UnknownFamily
	Varibaculum
	Vermiphilaceae
	Verrucomicrobium
	Verticiella
	YooniaLoktanella
